1 **ENHANCED RECOMBINATION AMONG SARS-COV-2OMICRON VARIANTS**  
2 **CONTRIBUTES TO VIRAL IMMUNE ESCAPE.**

3 **Rishad Shiraz<sup>1,2</sup>, Shashank Tripathi<sup>1,2,\*</sup>**

4 <sup>1</sup>Center for Infectious Disease Research, Microbiology & Cell Biology Department, Indian  
5 Institute of Science, Bengaluru, India

6 <sup>2</sup>Microbiology & Cell Biology Department, Indian Institute of Science, Bengaluru, India

7 \*Correspondence: [shashankt@iisc.ac.in](mailto:shashankt@iisc.ac.in)

8 **ABSTRACT**

9 SARS-CoV-2 virus evolution occurs as a result of antigenic drift and shift. Although  
10 antigenic drift has been extensively studied, antigenic shift, which for SARS-CoV-2 occurs  
11 through genetic recombination, has been examined scarcely. To gain a better understanding  
12 of the emergence and prevalence of recombinant SARS-CoV-2 lineages through time and  
13 space, we analyzed SARS-CoV-2 genome sequences from public databases. Our study  
14 revealed an extraordinary increase in the emergence of SARS-CoV-2 recombinant lineages  
15 during the Omicron wave, particularly in Northern America and Europe. This phenomenon  
16 was independent of sequencing density or genetic diversity of circulating SARS-CoV-2  
17 strains. In SARS-CoV-2 genomes, recombination breakpoints were found to be more  
18 concentrated in the 3' UTR followed by ORF1a. Additionally, we noted enrichment of  
19 certain amino acids in the spike protein of recombinant lineages, which have been reported to  
20 confer immune escape from neutralizing antibodies, increase ACE2 receptor binding, and  
21 enhance viral transmission in some cases. Overall, we report an important and timely  
22 observation of accelerated recombination in the currently circulating Omicron variants and  
23 explore their potential contribution to viral fitness, particularly immune escape.

24 **INTRODUCTION**

25 RNA viruses constitute the majority of emerging and re-emerging human pathogens. These  
26 viruses are known to accumulate genetic mutations at a higher rate, compared to other  
27 infectious agents with DNA genomes (1). This is primarily due to the error-prone action of  
28 viral RNA-dependent RNA polymerase (RdRP) and the lack of viral proofreading enzymes.  
29 Such mutations are known as 'Antigenic Drift' which is gradual, incremental and provides  
30 the genetic diversity essential for viral fitness. These mutations contribute to viral zoonosis,

31 immune escape, enhanced transmission, altered tropism and pathogenesis (2-4). SARS-CoV-  
32 2 has a ~30 kb long ssRNA genome which is also replicated by an error-prone RdRP  
33 (NSP12) introducing  $8 \times 10^{-4}$  nucleotide substitution/site/year(5). Although SARS-CoV-2  
34 encodes for an exonuclease enzyme (NSP14) with proofreading ability, it has shown  
35 remarkable antigenic drift to evade infection and vaccine-mediated immunity and enhance  
36 viral transmission during progressive waves by different variants of concern (VOCs) (6-12).  
37 Another way, by which sudden large-scale genetic changes appear in the RNA virus genomes  
38 is called ‘Antigenic Shift’, which happens either by genetic reassortment or by genetic  
39 recombination (13-15). Genetic reassortment is known to underlie the emergence of Influenza  
40 A virus pandemic strains, however, it is limited to viruses with a segmented genome (13, 16).  
41 Genetic recombination, on the other hand, can happen in both segmented as well as non-  
42 segmented viral genomes. It has been reported to contribute to viral adaptation in cases of  
43 Polio, HIV, and HCV (14, 17, 18).

44 Genetic recombination in the RNA virus genomes happens through molecular processes such  
45 as template switching and homologous recombination (19). It requires co-infection of the  
46 host with parent strains, which are usually co-circulating in the same location (20). Genetic  
47 recombination is a shared feature of Sarbecovirus evolution and is believed to have  
48 contributed to the emergence of SARS-CoV, MERS as well as SARS-CoV-2 (21, 22).  
49 Recombination events in the SARS-CoV-2 genome during COVID-19 pandemic have been  
50 examined before in specific contexts (15, 20, 23-25). The first recombinant lineage reported,  
51 named XA appeared first in the UK and continued to circulate for a limited time (20). Later,  
52 recombinant lineage XB sequences were reported in the USA though it emerged before XA,  
53 with substantial forward circulation (15). Recombinants between VOCs were reported later,  
54 such as XC parented by Alpha and Delta that emerged in Japan, although with limited  
55 forward circulation (23).

56 A comprehensive analysis of the current status of recombinant SARS-CoV-2 lineages, their  
57 evolutionary history, phylogenetic relationship and contribution to viral evolution during the  
58 COVID-19 pandemic has been lacking. To understand the prevalence and significance of  
59 genetic recombination events in the SARS-CoV-2 genome, we analysed the publicly  
60 available whole genome datasets, spanning the entire COVID-19 pandemic. We observed a  
61 striking escalation in the appearance of recombinant lineage during the Omicron wave,  
62 although the first major recombinant lineage appeared during the Alpha wave.  
63 Geographically, the majority of recombinant lineages emerged in Northern America and

64 Northern European countries, especially in the UK, subsequently spreading to different parts  
65 of the world. Detailed analysis of the nucleotide sequences of recombinant lineages revealed  
66 the untranslated regions (UTRs), especially the 3' UTR to be a recombination hotspot.  
67 Among coding regions, recombination breakpoints were most prevalent in ORF1a. At the  
68 protein level, we observed conserved specific amino acid changes in the NSP14 exonuclease  
69 of recombinant lineages parented by Omicron VOC, which may have a potential role in the  
70 enhanced recombination frequency. Interestingly there were multiple mutations enriched in  
71 the Spike protein of recombinant lineages, which have been reported to provide resistance  
72 against neutralizing antibodies, strengthen ACE2 receptor binding and enhance viral  
73 transmission. Overall, this study provides timely observation of escalation in the appearance  
74 of recombinant SARS-CoV-2 lineages during Omicron wave and provides detailed insight  
75 into the functional relevance of genetic changes acquired through recombination, especially  
76 in immune escape.

## 77 **RESULTS**

### 78 **SARS-CoV2 Omicron Variant wave coincided with an extraordinary escalation in the** 79 **emergence of recombinant lineages.**

80 To understand the role of recombination in SARS-CoV-2 evolution, we analysed 1,206,055  
81 complete SARS-CoV-2 genome sequences deposited in the NCBI database and all the  
82 recombinant lineage sequences deposited in the GISAID database collected between  
83 December 2019 to July 2022 (26, 27). Although recombination is one of the important  
84 strategies utilised by RNA viruses, SARS-CoV2 unlike other coronaviruses showed modest  
85 recombination (24), with only three recombinant lineages reported in the first 2 years of the  
86 pandemic, up to November 2021 [FIG1A]. However, subsequently in the next seven months,  
87 between December 2021 to July 2022, 28 new recombinant lineages emerged, tallying the  
88 total number of recombinant lineages from 3 to 31. This was a more than 1 order of  
89 magnitude increase in the number of new recombinant lineages. Next, we checked the  
90 timeline of appearance and period of circulation of the recombinant lineages based on data  
91 available in the GISAID (26). We observed that the first recombinant lineage of SARS-CoV2  
92 was XB which appeared in July 2020 and was prevalent till September 2021. During these 5-  
93 months, two more recombinant lineages emerged, XA in January 2021 and XC in August  
94 2021. Both these lineages had a limited circulation period of around 2 months. The last XC  
95 lineage sequence was collected in October 2021, and for the next 2 months till mid-December

96 2021, no recombinant lineage sequences were detected. However subsequently, the number  
97 of recombinant lineages escalated rapidly. In December 2021, three new recombinant  
98 lineages XT, XF and XH emerged. While January of 2022 recorded the emergence of 11 new  
99 recombinant lineages namely XG, XAC, XD, XS, XJ, XE, XU, XN, XM, XAH and XV,  
100 February of 2022 recorded 9 new recombinant lineages namely XAB, XL, XK, XQ, XAA,  
101 XR, XAF, XAD and XAE, March of 2022 recorded 2 recombinant lineages namely XZ and  
102 XY, and remaining XAG recombinant lineage emerged in April 2022. This increased  
103 frequency of recombination events, coincided with the peak of the Omicron wave, especially  
104 between December 2021 to January 2022 [S1A]. Next challenge was to understand whether  
105 detection of enhanced SARS-CoV-2 recombination events was due to a natural increase in  
106 the emergence of recombinant lineages or was a by-product of increased worldwide SARS-  
107 CoV-2 sequencing. For this, we examined the percentage prevalence of recombinant lineages  
108 sequence submissions over the COVID-19 pandemic timeline [S1B]. For each of the 29  
109 recombinant lineages other than XD and XT, when they recorded maximum percentage  
110 prevalence, more than 1 in every 1000 SARS-CoV2 genomes sequenced belonged to these  
111 recombinant lineages. In the cases of XD and XT, they reported a sequence detection  
112 frequency of more than 1 in every 2000 SARS-CoV2 genomes sequenced during their peak  
113 percentage prevalence. These frequencies are suggestive of recombinant lineage detections  
114 not being an associated consequence of increased sequence surveillance efforts, but indeed  
115 due to increased natural emergence of recombinant lineages. To understand the prevalence of  
116 specific recombinant lineages through the pandemic, we analysed the total number of  
117 recombinant sequences from different lineages (in GISAID) over time [FIG1B]. The XB  
118 recombinant lineage, first emerged in July 2020 (earlier than alpha variant-driven pandemic  
119 waves), and it peaked in July of 2021 constituting ~9% of all SARS-CoV2 sequences [S1B].  
120 Another recombinant lineage with a higher prevalence was XE, which was still circulating in  
121 July 2022. To understand the relationship between the emergence of recombinant lineages  
122 with other significant non-recombinant lineages, we compared the timeline of their  
123 emergence and circulation during the COVID-19 pandemic. Results showed a clear regime  
124 change in December 2021, with the fall of delta variant lineages and the emergence of  
125 omicron variant lineages [FIG1C]. It was evident that the surge of the omicron variant  
126 perfectly coincided with the increased emergence of recombinant lineages [S1A].  
127 Furthermore, we examined the total number of unique SARS-CoV-2 lineages present at any  
128 given time during the pandemic, to see whether increased recombination was linked to  
129 increased available genetic diversity [S1C]. We did not observe any increase in the number of

130 lineages detected per day during the rapid upsurge in recombinant lineages. This suggests the  
 131 sudden extraordinary upsurge in the emergence of recombinant lineages during the omicron  
 132 wave of the pandemic is not due to the overall increase in genetic diversity of SARS-CoV-2  
 133 lineages.

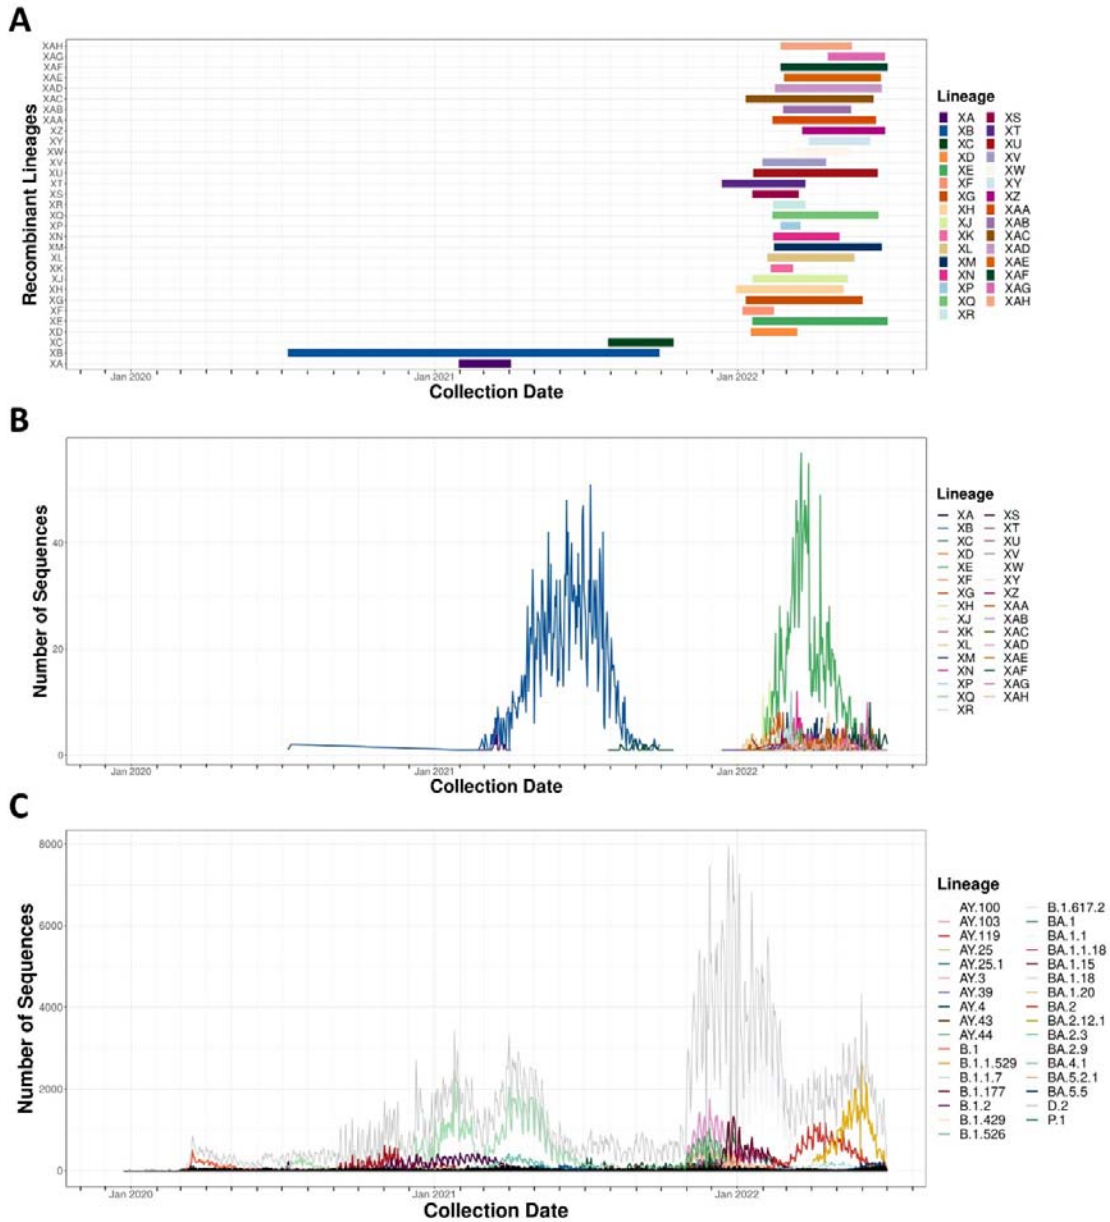

134 **Figure 1: Timeline of SARS-CoV-2 recombinant lineage emergence and circulation.** (A)  
 135 Timeline of SARS-CoV2 recombinant lineages with Y axis showing recombinant lineages,  
 136 X-axis showing the sequence collection date. Horizontal coloured bars indicate the period  
 137 between the first and last detection of the corresponding colour-coded recombinant lineage.  
 138 (B) Prevalence of SARS-CoV-2 recombinant lineages over time with Y axis showing the  
 139 daily number of sequences reported, X-axis showing the sequence collection date having axis

140 ticks indicating months. Each coloured line in the graph shows the daily number of sequences  
141 collected belonging to the corresponding recombinant lineage, with lineage colours the same  
142 as Fig1A. (C) Prevalence of all lineages of SARS-CoV-2 over time with Y axis showing a  
143 daily number of sequences reported, X-axis showing the sequence collection date having axis  
144 ticks indicating months. The Grey line in the graph represents the total number of sequences  
145 collected, while less prevalent lineages with less than 150 sequences collected on the day of  
146 its maximum peak are represented in black. Each coloured line other than black and grey in  
147 the graph represents major SARS-CoV-2 lineages with at least 150 of the lineage sequence  
148 collected on the day of its maximum peak. X axis of all three graphs ranges from 1<sup>st</sup>  
149 December 2019 to 1<sup>st</sup> July 2022 with axis ticks indicating months and are aligned making  
150 them temporally comparable to each other.

151

### 152 **Europe and North America have been the Hotspots for the emergence and spread of** 153 **SARS-CoV-2 recombinant Lineages.**

154 Before the Omicron wave, recombinant lineages of SARS-CoV-2 were few and had limited  
155 geographical spread. To understand if the sudden increase in recombinant lineages during the  
156 Omicron wave was localized to specific regions, we analysed the geographic distribution of  
157 recombinant lineages compared to the cumulative spread of the SARS-CoV2 through the  
158 COVID-19 pandemic [FIG2A]. We observed that, although recombinant lineages spread  
159 across the world, they were more concentrated in Europe, North and Central American  
160 regions, followed by Asia, South America and least Australia and Africa. To test for possible  
161 geographic bias in recombinant lineage emergence, we analysed the percentage distribution  
162 of each recombinant lineage per country followed by marking the country of first detection  
163 [FIG2B]. As sequencing efforts of SARS-CoV2 genomes are geographically skewed with  
164 developed countries contributing more to the sequencing data (28), the first detection of  
165 recombinant lineage sequence in a country could be a mere consequence of higher  
166 sequencing efforts. But if a country recorded both first detection and the highest prevalence  
167 of a particular recombinant lineage, that country is identified as the country of emergence for  
168 that recombinant lineage. Out of the 28 recombinant lineages detected post-emergence of  
169 omicron variant, 16 lineages emerged in European countries as they were first detected and  
170 most prevalent in these countries. Out of these 16 recombinant lineages, a maximum number  
171 of lineages (7) namely XE, XF, XL, XN, XP, XQ and XR emerged in the UK, and 3 lineages  
172 XM, XAB and XAD emerged in Germany, and another 3 lineages XG, XH and XV emerged  
173 in Denmark, XJ emerged in Finland while XAH emerged from Slovenia. The XK  
174 recombinant lineage emerged in Belgium and was the only recombinant lineage that did not  
175 spread beyond the country of the first detection. Out of 28 recombinant lineages detected  
176 post-emergence of Omicron, 4 lineages namely XS, XY, XZ and XAA were first detected

177 and remained most prevalent in the USA, and XAF emerged from Costa Rica representing  
 178 Central America.

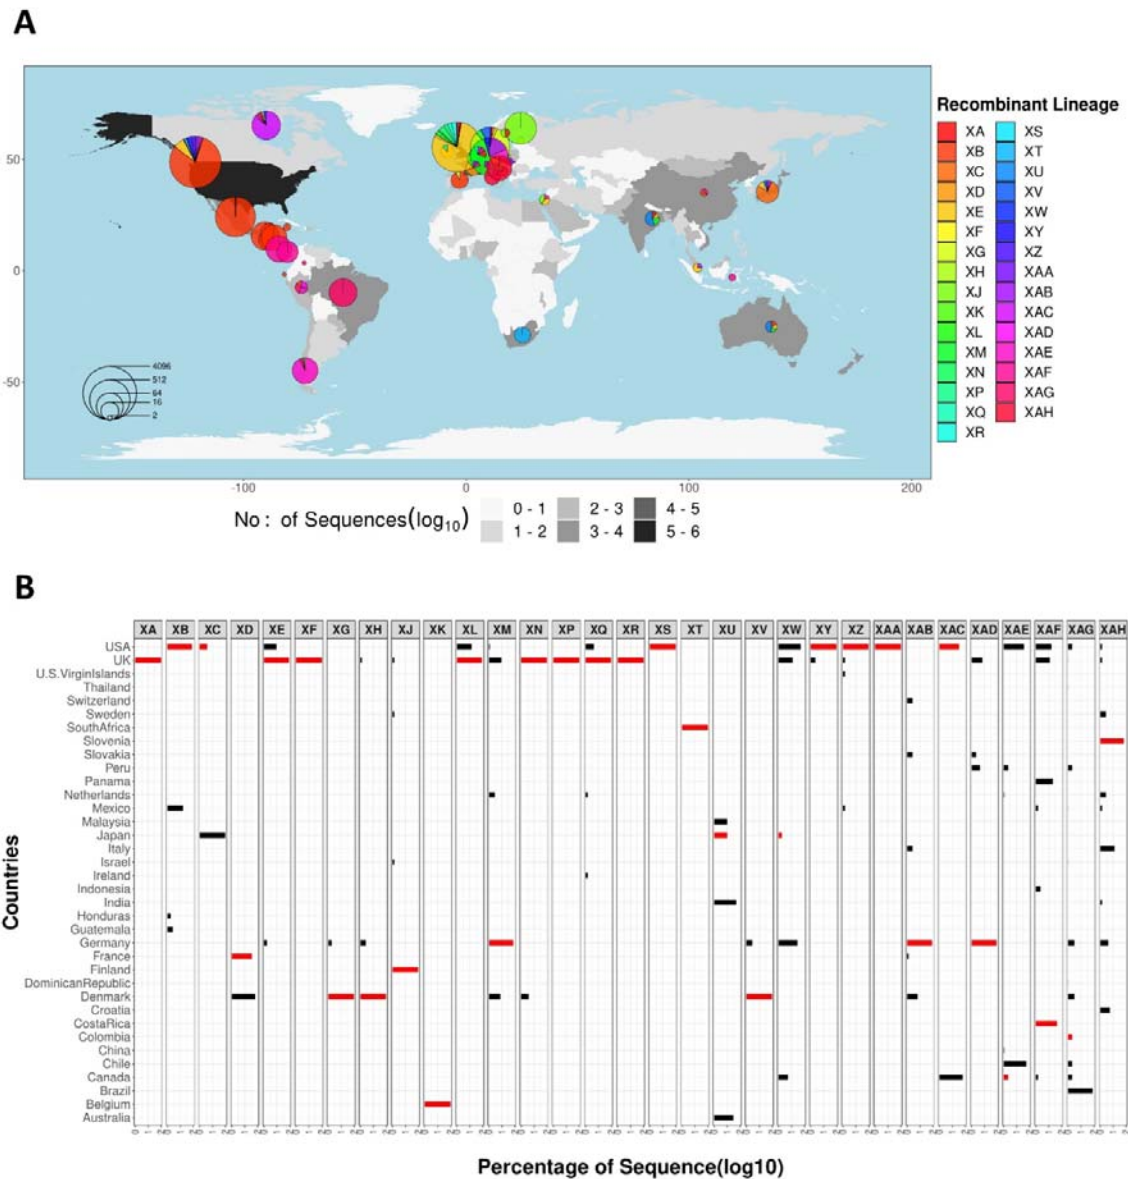

179

180 **Figure 2: Global geographic spread, percentage geographic distribution and country of**  
 181 **the first detection of SARS-CoV2 recombinant lineages.** (A) Geographic distribution of  
 182 SARS-CoV2 recombinant lineages with X and Y axis representing longitude and latitude  
 183 respectively. The map fill colour of each country is a gradient of grey representing the  
 184 number of SARS-CoV2 sequences collected and deposited onto the NCBI database from  
 185 each country (in log10 scale) with dark grey representing more sequences (Legends  
 186 positioned at the bottom). The pie chart in each country represents the distribution of  
 187 recombinant lineage sequences collected from that country, with different colours  
 188 representing different recombinant lineages (Legends positioned on the right side). The radius

189 of the pie chart is proportional to the log<sub>2</sub> number of all recombinant lineage sequences  
190 collected from that country(Legends positioned inside the map in the bottom left). (B)  
191 Facetted horizontal Bar graph representing percentage geographic distribution of each  
192 recombinant lineage, with lineage names corresponding to the facet mentioned on the top.  
193 For each facet, X-axis shows the percentage of that lineage sequence(in log<sub>10</sub> scale) and the  
194 Y axis shows countries with at least 10% of any recombinant lineage sequence. Bars marked  
195 in red indicate the country from where the first sequence of that recombinant lineage was  
196 collected.

197

198 The XT lineage was exclusively detected in South Africa, representing the African continent.  
199 In cases of XD, XU, XW, XAC, XAE and XAG, although they were first detected in France,  
200 Japan, Japan, USA, Canada and Colombia respectively, they showed maximum prevalence in  
201 Denmark, India, USA, Canada, Chile and Brazil. Here country of the first detection is not  
202 correlating with the country of maximum prevalence, indicating the spread of the  
203 recombinant lineage beyond the country of origin. These lineages could have either emerged  
204 in the country where they were first detected but had limited circulation, or country of  
205 maximum prevalence where it was not initially detected. Of the other three recombinant  
206 lineages detected before the omicron wave, XA was only detected in the UK, while XB  
207 emerged in the USA where it was first detected and circulated in maximum prevalence with  
208 spread limited to North and Central America (15). In the case of XC, although more than  
209 90% of sequences were detected in Japan, its first sequence was collected from the US. Here  
210 even, the country of the first detection is different from the country of maximum prevalence.

211

212 **The majority of SARS-CoV-2 recombinant lineages belong to Omicron monophyletic**  
213 **group.**

214 To understand the genealogical distribution of recombinant lineages, a phylogenetic analysis  
215 was performed [FIG3]. Maximum-likelihood phylogenetic tree of SARS-CoV2 lineages was  
216 inferred using lineage representative sequences rooted in the A lineage, which is the closest  
217 relative to RatG13 (29). To analyse if any of these 31 recombinant lineages are phylogenetic  
218 duplicates assigned with different names, other than analysing one sequence each in the case  
219 of non-recombinant lineages, 3 representative sequences each of recombinant lineages were  
220 analysed in the phylogenetic tree. Here we could identify, intra-recombinant lineage  
221 sequences of all the 31 recombinant lineages clustering together to be genealogically close to  
222 each other than any other lineage. We could observe intra-recombinant lineage sequences to  
223 be phylogenetically closer to each other than inter-recombinant lineage sequences, validating



224 all the 31 recombinant lineages to be unique lineages resulting from exclusive recombination  
 225 events.

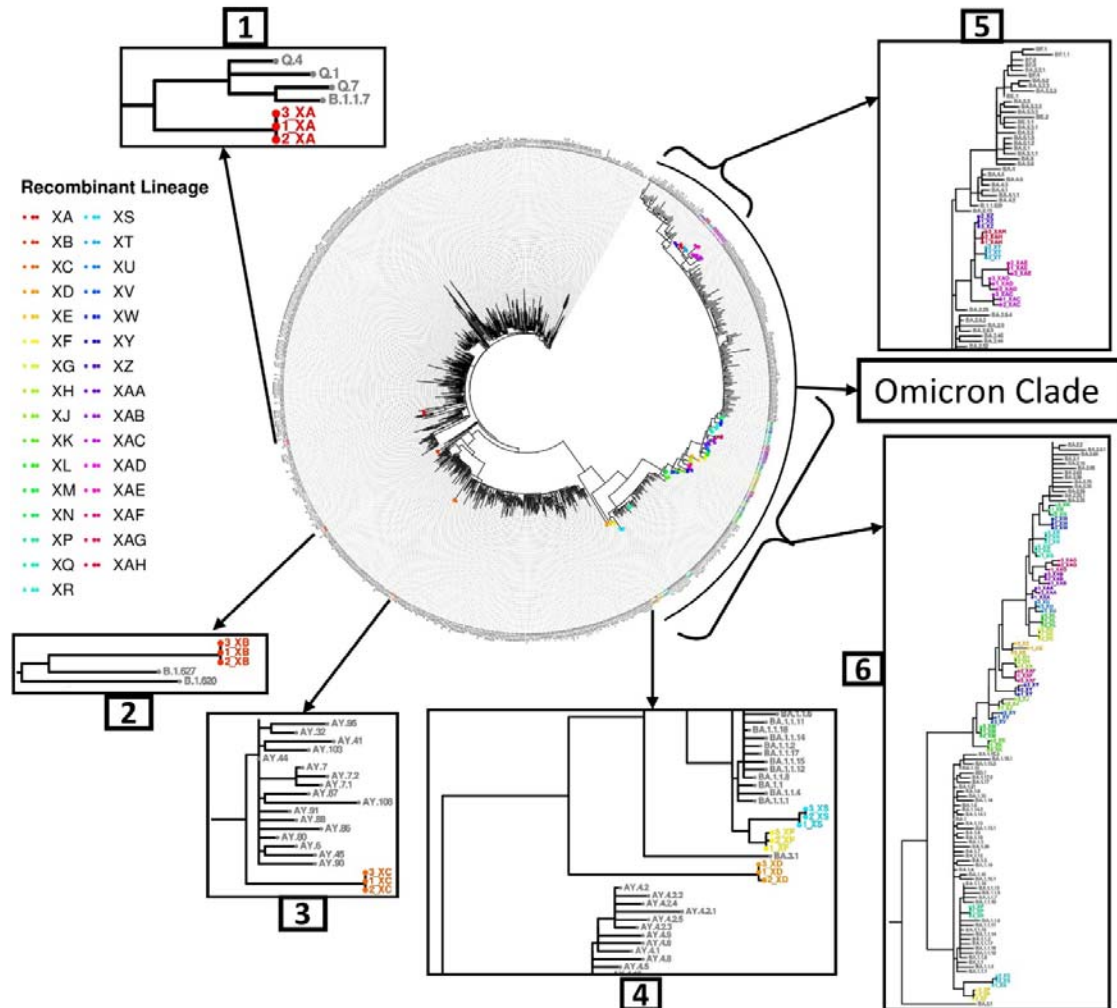

226

227 **Fig 3: Phylogenetic tree of SARS-CoV2 and genealogical distribution of recombinant**  
 228 **lineages:** Phylogram in circular layout at the centre represents consensus phylogenetic tree of  
 229 SARS-CoV2 with three sequences each of recombinant lineages and one sequence each of  
 230 other lineages. Tip labels are lineage names, with the number of the sequence mentioned  
 231 followed by an underscore used before the lineage name in the case of recombinant lineage  
 232 sequences. Recombinant lineage sequence tip labels and tip points are labelled in colours  
 233 other than black (Legends positioned to the left), while all other lineage sequences are  
 234 coloured black. 5 insets show zoomed portions of the phylogenetic tree in a rectangular  
 235 layout. Inset 1 – Shows XA recombinant lineage sequences and all lineage representative  
 236 sequences sharing the same parent node. Inset 2 – Shows XB recombinant lineage sequences  
 237 and all lineage representative sequences in two immediate consecutive parent nodes. Inset 3 –  
 238 Shows XC recombinant lineage sequences with some lineage representative sequences

239 sharing immediate consecutive parent nodes. Inset 4 – Shows XD recombinant lineage  
240 sequences with part of lineage representative sequence clade sharing the same parent node.  
241 Inset 5 – Shows XT, XZ, XAC, XAD, XAE and XAH, and neighbouring lineage  
242 representative sequences. Inset 6 – Shows XF, XS, XP, XK, XM, XV, XJ, XJ, XY, XAF,  
243 XH, XE, XG, XL, XU, XAA, XAB, XAG, XQ, XR, XW and XN, and neighbouring lineage  
244 representative sequences.

245

246 The XA recombinant lineage aligned neighbouring alpha variant clade sharing a common  
247 parent node [Fig3: Inset 1]. The XB recombinant lineage near B.1.627 lineage sharing a  
248 common node [Fig3: Inset 2]. The XC recombinant lineage aligned near delta variant  
249 lineages sharing a common parent node to delta variant subclade [Fig3: Inset 3]. While XD  
250 recombinant lineage aligned near omicron lineages sharing a common parent node to omicron  
251 monophyletic group [Fig3: Inset 4]. All the remaining 27 of the total 31 recombinant lineages  
252 were present in Omicron's clade. XS, XF and XP were all present inside omicron's subclade  
253 BA.1 of which, XS and XF were sister groups sharing a common divergence point, with XS  
254 being genetically distant [Fig 3: Inset 6]. XZ, XAH, XT, XAE, XAD and XAC together form  
255 a subclade in the omicron monophyletic group [Fig 3: Inset 5]. This subclade and BA.2.29  
256 lineage share a common parent node and are in the BA.2 subclade. The rest of the 18  
257 recombinant lineages aligned themselves between BA.1 omicron sub-clade and BA.2  
258 omicron sub-clade [Fig 3: Inset 6]. When arranged in the order of closeness to BA.2, they are  
259 XN, XW, XR, XQ, XAG, XAB, XAA, XU, XL, XG, XE, XH, XAF, XY, XJ, XV, XM and  
260 XK with former being closer to BA.2 sub-clade and latter being closer to BA.1 sub-clade.

261

262 **The majority of SARS-CoV-2 recombinant lineages emerged through recombination**  
263 **between parents of the Omicron variant type.**

264 The next step was to understand parent lineages which recombine to form recombinant  
265 lineages. Clues regarding the clades in which potential parent lineages could be present were  
266 available ([cov-lineage.org](#)). We identified the most likely parent lineages and the  
267 corresponding recombination breakpoint regions in their genomes according to 3SEQ for all  
268 the recombinant lineages, except for XB, XP and XW for which the data were insufficient  
269 [FIG 4A; S.Table 1]. Both 3SEQ, as well as RDP5 using the default settings, were unable to  
270 detect recombination events on these three lineage sequences. Parent sequences of XB were  
271 previously reported to be B.1.631 and B.1.634 (15). Of the three recombinant lineages that  
272 emerged before the omicron wave, XA is recombinant of the alpha variant sub-lineage (Q4)

273 and B.1.177.18, while XC recombinant of an alpha variant sub-lineage (B.1.1.7) and a delta  
274 variant sub-lineage (AY.44). Remaining all 26 recombinant lineages originated from parents  
275 of omicron lineages. Among them XD, XF and XS were co-parented by sub-lineages of  
276 omicron subclade BA.1 and delta variant sub-lineages. Of the remaining recombinant  
277 lineages, 23 were co-parented by BA.1 sub-lineages and BA.2(stealth omicron) sub-lineages,  
278 both of which are omicron sub-clades. Summing up, 2 recombinant lineages (XA, XC) were  
279 co-parented by alpha variant sub-lineages, and 4 (XC, XD, XF, XS) were co-parented by  
280 delta variant sub-lineages, 26 were co-parented by omicron variant sub-lineages of which 23  
281 had omicron sub-lineages as both the parents. To substantiate the evidence of true parent  
282 lineages for each of the recombinant lineages, the circulation time span for each of the  
283 recombinant lineages and their corresponding parent lineages were analysed [FIG4A]. We  
284 observed significant overlap between recombinant lineage time spans and corresponding  
285 parent lineage time spans further substantiating the authenticity of the parent lineages.  
286 Mosaic structures in each recombinant lineage genome with nucleotide positions inherited  
287 from parent 1, parent 2 and breakpoint regions inferred according to 3SEQ were visualized to  
288 understand the genetic makeup of each of the recombinant lineages [FIG4B]. We did not find  
289 any obvious pattern in recombination with a minimum length of recombinant segment  
290 ranging from 2189 nucleotides in XC recombinant lineage to more than 13123 nucleotides in  
291 XV recombinant lineage. We further analysed the single nucleotide polymorphism (SNP)  
292 patterns with respect to Wuhan Hu 1 strain as a reference, in recombinant and corresponding  
293 parent lineages to identify SNPs inherited from each parent [S2A]. We identified the mosaic  
294 structure of SNPs in the recombinant lineages correlating with the corresponding identified  
295 parent lineages validating recombinant lineages and corresponding parent lineages. To  
296 understand if there were recombination hotspots in the genome, where most recombination  
297 breakpoint regions fall, and if increased recombination with the advent of omicron variant  
298 was due to the development of a recombination hotspot in the genome, recombination  
299 breakpoint regions of all the recombinant lineages across the genome were analysed [Fig4C].  
300 Recombination breakpoint 1 was observed to be spread across the genome predominantly in  
301 the ORF1ab region, with no specific pattern or hotspots detected. But when we survey  
302 recombination breakpoint 2 of all recombinant lineages, even though it is outside the ORF1ab  
303 region, 60 per cent of it is observed in the 3'UTR region [Fig4C]. Next, we sought to  
304 understand if any region of a particular parent lineage or variant was preferably enriched in  
305 specific regions of the genome in recombinant lineages [S3B]. Parent variant percentage  
306 distribution at each nucleotide position in the genome of recombinant lineages was analysed.

307 We observed more than 75 per cent of recombinant lineages inherited spike sequences from  
 308 BA.2 sub-lineage parents [S2B]. The overall majority of the recombination events took place  
 309 among the same variants, with a recombination hotspot in 3' UTR and potential enrichment  
 310 of Spike from BA.2 sub-lineage.

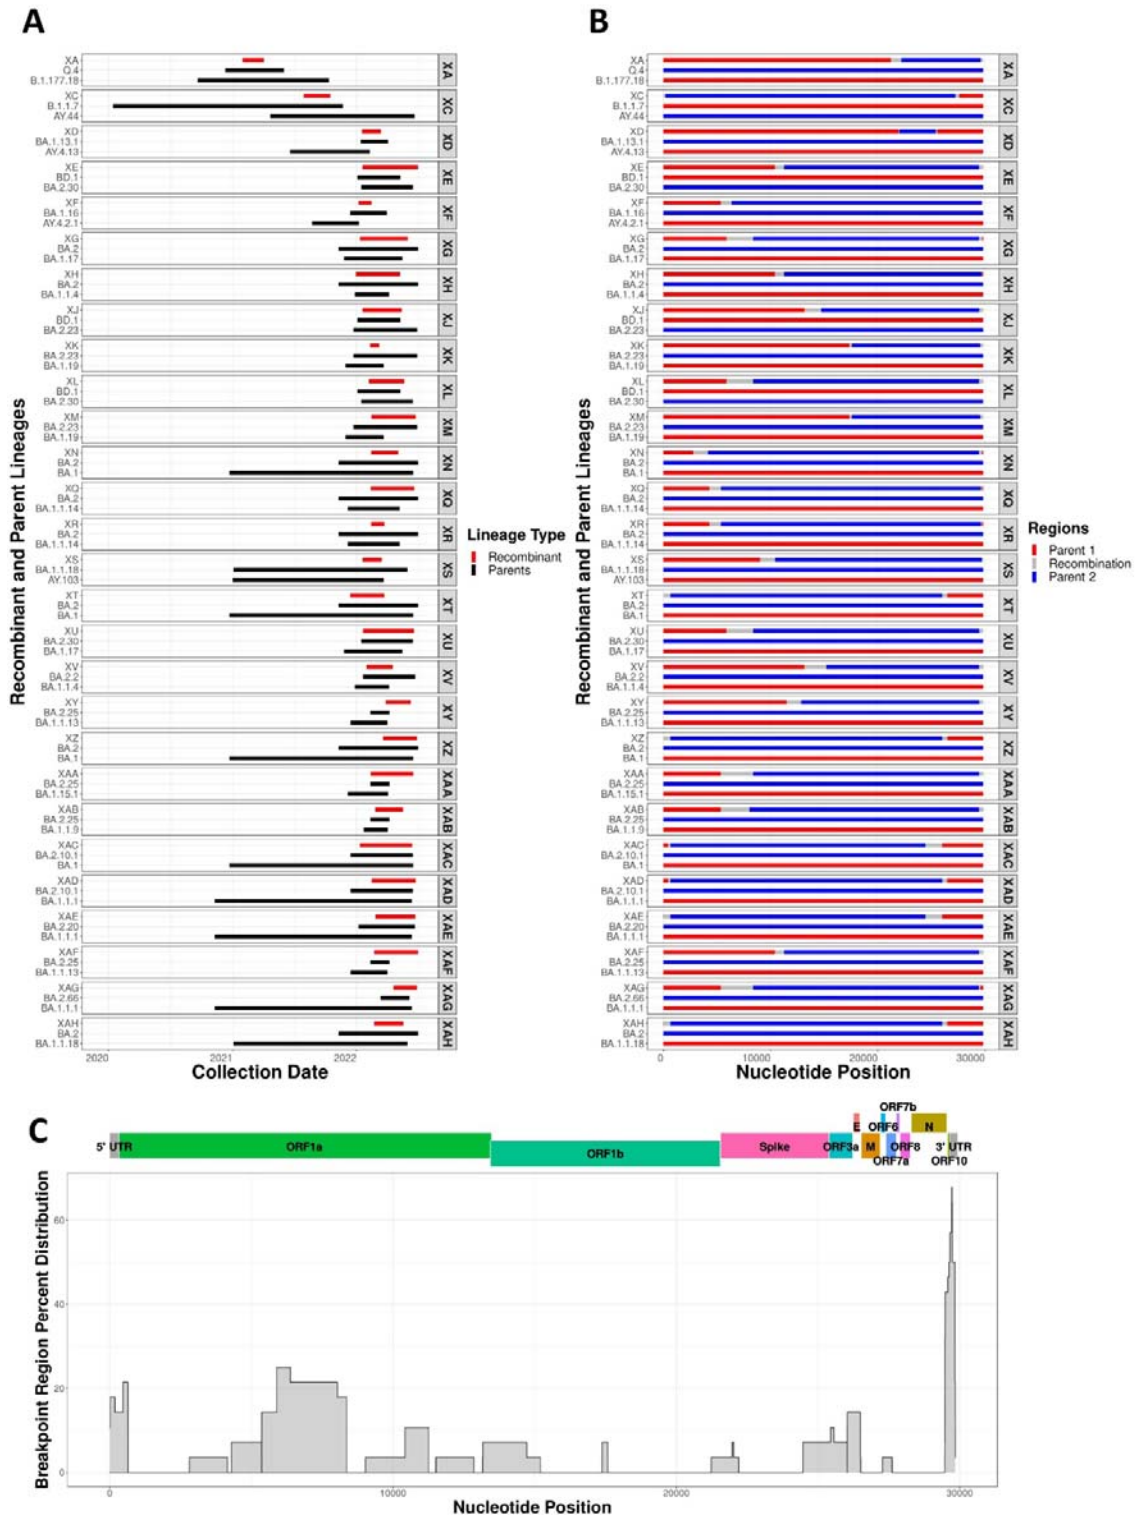

311 **Figure 4: Co-circulation detection, mosaicism and breakpoint region distribution of**  
312 **recombinant lineages with best-identified parent lineages using 3SEQ :** (A) Facetted  
313 timeline of recombinant lineages and corresponding parent lineages, where each facet  
314 representing a recombinant lineage with the facet mentioned to the right side of each facet.  
315 The Common X-axis shows the collection date of sequences. Each facet has a unique Y axis  
316 having recombinant and parent lineages, with recombinant lineages on top. Horizontal bars  
317 indicate the time span between the first and last detection of the corresponding lineage. Red  
318 bars indicate recombinant lineages and black bars for parent lineages. (B) Facetted mosaic  
319 structure representation of recombinant lineage genomes and corresponding parent lineages  
320 with common X-axis showing nucleotide sequence position in SARS-CoV2 genome. Y-axis  
321 and facets remain the same as in Fig4A. Coloured segments of red and blue indicate regions  
322 from each of the parents, with grey segments representing breakpoint regions predicted by  
323 3SEQ. (C) Percentage of breakpoint regions falling in each nucleotide position of all  
324 recombinant lineage genomes with X-axis showing nucleotide position in the genome, Y axis  
325 showing the percentage of breakpoints detected in corresponding nucleotide, ORF regions  
326 and UTRs are mapped onto the genome and marked on top with dark grey segments indicate  
327 5' UTR and 3' UTR regions while different colours showing different ORFs with names  
328 marked including ORF1a, ORF1b, Spike, ORF3a, E(Envelope), M(Membrane), ORF6,  
329 ORF7a, ORF7b, ORF8, N(Nucleocapsid Protein) and ORF10.

330

331 **Comparative analysis of the nucleotide and amino acid sequences of SARS-CoV-2**  
332 **recombinant lineages.**

333 Next, we examined nucleotide sequence variations between genomes of different SARS-  
334 CoV2 recombinant lineages [S5A]. We identified differential frequencies of nucleotide  
335 polymorphic sites in different regions of the genome ranging from 4.6 sites/100 nucleotide  
336 positions in ORF8 to 0.41 sites per 100 nucleotide positions in ORF1b. In the case of spike  
337 protein, we observed an intermediate 2.56 polymorphic sites per 100 nucleotide position with  
338 98 inter-recombinant lineage polymorphic sites [S5B]. Compared to that, in the spike protein  
339 of recombinant lineages formed post omicron emergence, polymorphic site frequency is  
340 reduced to 1.72 polymorphic sites per 100 nucleotide position with 66 nucleotide  
341 polymorphic sites. The sense nucleotide variations leading to amino acid changes are the  
342 primary driver of viral evolution. To understand the amino acid level changes introduced  
343 through recombination events, we analysed inter-recombinant lineage amino acid  
344 polymorphism in all the 12 ORFs [Fig5A]. We identified alternative stop codon positions in  
345 ORF8 of some recombinant lineages, where early stop codons were identified. Truncated  
346 ORF8 proteins having early stop codons are reported in some other lineages of SAR-CoV2  
347 (30). Like nucleotide polymorphic site frequency, we observed a differential number of  
348 amino acid polymorphic sites in different ORFs ranging from 7.37 sites per 100 amino acid  
349 positions in ORF8 protein to 0.7 sites/100 amino acid positions in ORF1b.

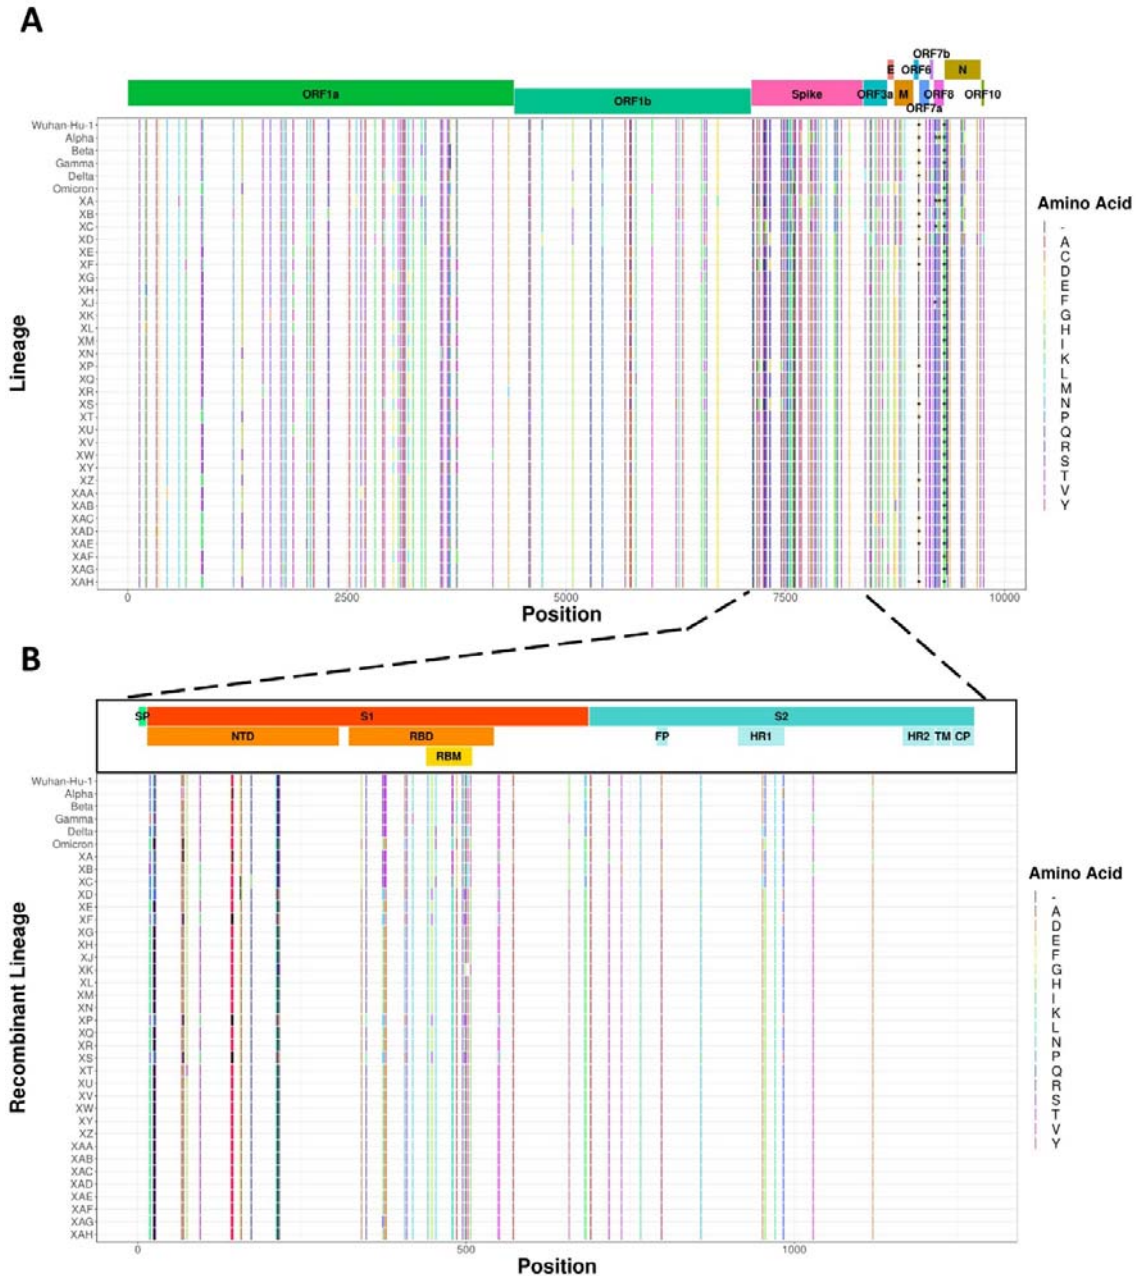

350

351 **Figure 5: SARS-CoV2 proteome amino acid inter-recombinant lineage polymorphic**  
 352 **sites with the spotlight on spike protein:** (A) SARS-CoV2 proteome polymorphic amino  
 353 acid positions are marked using “|”, with black indicating a gap in the amino acid position  
 354 and different colours representing different amino acids (Colour legends mark amino acids  
 355 with one letter amino acid codes). “\*” represents stop codons. Corresponding amino acids in  
 356 the inter-recombinant lineage polymorphic sites of Wuhan-Hu-1 strain, Alpha variant(B.1.1.7  
 357 lineage), Beta variant(B.1.351 lineage), Gamma variant(P.1 lineage), Delta variant(B.1.617.2  
 358 lineage) and omicron variant(B.1.1.529 lineage) are included for comparison. Each of the 12  
 359 ORF regions was mapped and marked on top in different colours including ORF1a, ORF1b,  
 360 Spike, ORF3a, E(Envelope), M(Membrane), ORF6, ORF7a, ORF7b, ORF8, N(Nucleocapsid

361 Protein) and ORF10 (B) SARS-CoV2 Spike protein inter-recombinant lineage amino acid  
362 polymorphic sites with both X and Y axis remaining same as Fig5A Different colours  
363 representing different amino acids and black indicating a gap in the amino acid  
364 position(Colour legends mark amino acids with one letter amino acid codes). Spike ORF sub-  
365 regions were mapped and marked on top. Regions marked include SP(Signal Peptide), S1,  
366 S2, NTD(N-Terminal Domain), RBD(Ribosome Binding Domain), RBM(Ribosome Binding  
367 Motif), FP(Fusion Peptide), HR1(Heptad Repeat 1), HR2(Heptad Repeat 2),  
368 TM(Transmembrane region) and CP(Cytoplasmic region). Different colours mark different  
369 spike subregions with S1 and subregions represented in shades of orange, while S2 and sub-  
370 regions are represented in shades of cyan.

371

372 Spike protein exhibited an amino acid polymorphic site frequency of 1.72 sites per 100 amino  
373 acid positions with 64 amino acid polymorphic sites [Fig5B]. Of these 64 sites, 25 of these  
374 sites were identified in the N-terminal domain (NTD) region with a frequency of 8.5  
375 polymorphic sites per 100 amino acid positions, 20 of them in the RBD (Receptor Binding  
376 Domain) region with 8.9 polymorphic sites/100 amino acid positions, 1 site in fusion protein  
377 region with 5.5 polymorphic sites per 100 amino acid positions and 5 sites in Heptad repeat 1  
378 with a frequency of 6.8 polymorphic sites per 100 amino acid positions. When we compare  
379 only among recombinant lineages formed post omicron emergence, there are 34 amino acid  
380 polymorphic sites, 22 sites are in NTD with the frequency of 7.48 polymorphic sites per 100  
381 amino acid positions, 9 sites in RBD with 4.03 polymorphic sites per 100 amino acid  
382 positions and 1 site in Heptad repeat 1 region with a frequency of 1.37 polymorphic sites per  
383 100 amino acid positions. The recombination events in coronaviruses involve the action of  
384 exonuclease (Nsp14) and other viral polymerase components. It was previously reported that  
385 Nsp14 plays an important role in the recombination of coronaviruses (31). To understand if  
386 the increased emergence of recombinant lineages parenting omicron variant sublineages, was  
387 due to any specific change in the replication and proof-reading machinery in the parent  
388 lineages, we analysed the Nsp14 protein sequence in all the recombinant parent lineages and  
389 major VOCs [S4A]. We were able to identify I42V mutation conserved across parent lineages  
390 belonging to the omicron variant as well as in the Omicron variant parent lineage (B.1.1.529)  
391 [S4B]. As RdRp (Nsp12) and Helicase(Nsp13) play important roles in the replication (32),  
392 we analysed both the protein sequences but did not find any specific amino acid conservation  
393 pattern in parent lineages from omicron lineage, potentially ruling out their role in heightened  
394 emergence of recombinant lineages post-emergence of omicron variant [S5A; S5B]. As  
395 Nsp10 plays an important role in Nsp14 function acting as a cofactor, we even analysed its

396 amino acid sequence and here also we did not find any specific mutation conservation pattern  
397 in omicron variant recombinant parent lineages [S5C].

398 **Spike protein of SARS-CoV-2 recombinant lineages has an enrichment of amino acid**  
399 **changes that impart immune escape.**

400 Spike protein of SARS-CoV-2 is crucial for immune escape and viral fitness and has shown  
401 significant sequence variability, potentially due to immune pressure (3). We examined  
402 whether Spike protein of recombinant lineages had any specific pattern of amino acid  
403 enrichment, especially in the key functional domains. For this, we calculated the amino acid  
404 residue conservation score in the spike protein of parent lineages of omicron recombinant  
405 lineages relative to non-recombinant omicron lineages (Relative conservation score)  
406 [FIG6A]. We identified 28 residues relatively conserved, of which 16 residues reside in the  
407 NTD region of the spike, 9 residues in the RBD region and 1 residue in the HR-1 region of  
408 the spike. Analysing the spike protein three-dimensional structure showed most of these  
409 conserved residues reside exposed on the surface [FIG6B]. Of the 28 relative conserved  
410 residues, 11 of them are different from Wuhan Hu 1 strain reference sequence, indicating  
411 although non-recombinant omicron lineages underwent variation at the other 17 sites, they  
412 were not selected in the recombinant lineages potentially due to their combinatorial or  
413 individual deleterious nature in resulting recombinant viruses. Now we sought to understand  
414 the significance of all these 11 specific conserved mutated positions in spike protein different  
415 from the Wuhan Hu 1 reference strain [Table 1]. 6 of these conserved amino acid positions  
416 namely 19, 24, 25, 26, 27 and 213 are located in NTD region while rest 5 of them namely  
417 371, 376, 405, 408 and 493 are located in RBD region. All conserved mutations in the NTD  
418 region of I19T, del24-26+A27S and V213G are reported to cause significant evasion from  
419 neutralisation antibodies (nAbs) targeting the NTD. Similarly, all conserved mutations in the  
420 RBD region namely S371F, T376A, D405N, R408S and Q493R play significant roles in  
421 vaccine evasion, broad sarbecovirus neutralizing antibodies escape, poor cross-reactivity  
422 among SARS-CoV2 lineages, ACE2 competing antibodies escape and resistance to  
423 therapeutic monoclonal antibodies against SARS-CoV2 (7, 33-35). Mutation in Q493 residue  
424 lineages play a crucial role in immune and vaccine evasion. Analysing these conserved sites  
425 in each of the recombinant lineages shows amino acid variation from the conserved residue in  
426 primarily 4 lineages in most of the sites, namely XD, XF, XS and XP [Supplementary Table  
427 2]. Out of these, XD, XF and XS only have a single omicron parent which is BA.1  
428 sublineage, and the other parent, a delta variant sublineage. In the case of XP recombinant



429 lineage, tracking the parent lineages still remains a challenge due to insufficient data. For all  
430 the other recombinant lineages parented by both omicron parent lineages, namely BA.1  
431 sublineages and BA.2 sublineages, conserved residue remains unchanged in all positions of  
432 these recombinant lineages, except in case XAG at spike amino acid position 371.

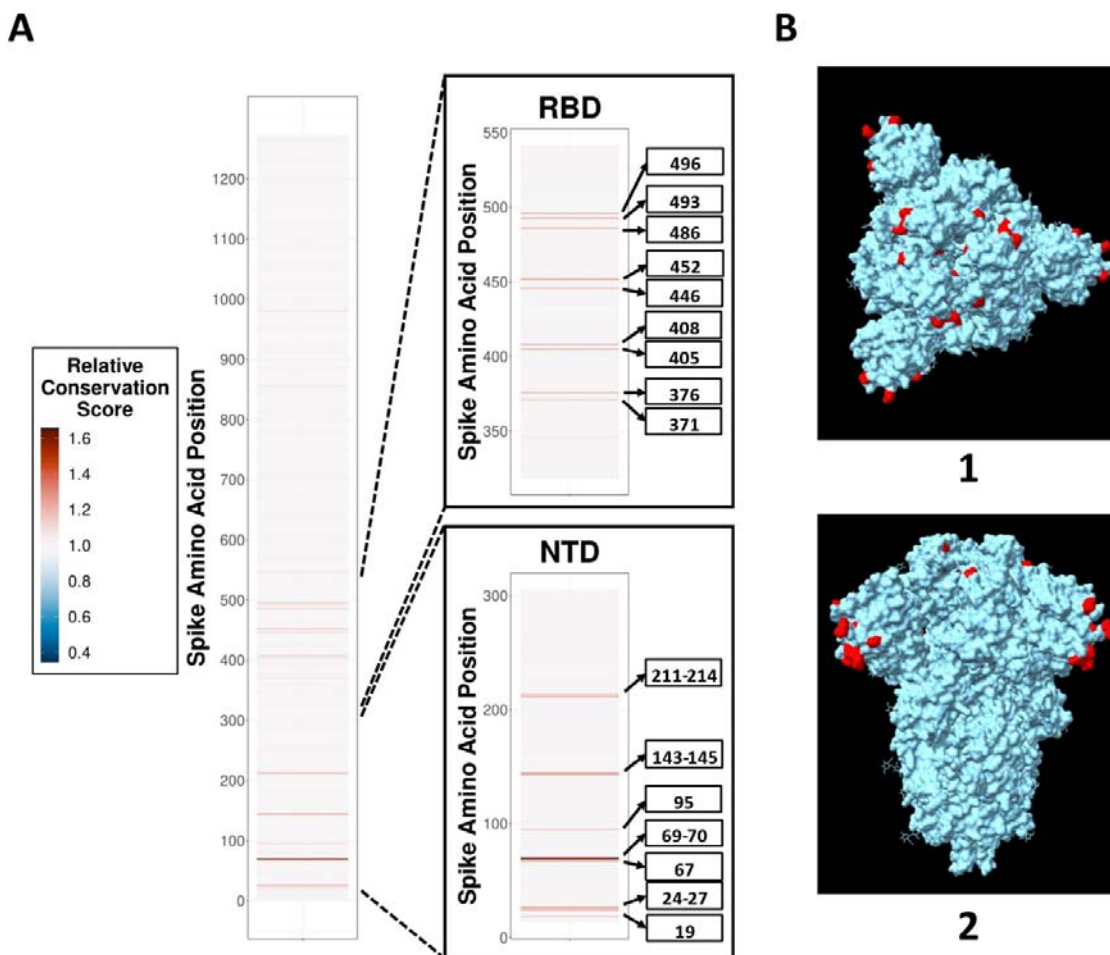

433

434 **Figure 6: SARS-CoV2 spike relative conserved residues in recombinant lineages and**  
435 **their structural visualization:** (A) Relative residue conservation score of recombinant  
436 lineages with at least one omicron variant parent, relative to non-recombinant omicron  
437 variant lineages with red coloured residues relatively more conserved among recombinant  
438 lineages than non-recombinant omicron variant lineages. There is only Y-axis here which  
439 shows the amino acid position in spike protein. There are two insets: Inset RBD – Relative  
440 residue conservation score of RBD zoomed in, with residues having more than 1.1 relative  
441 residue conservation score named; Inset NTD – Relative residue conservation score of NTD  
442 zoomed in, with residues having more than 1.1 relative residue conservation score marked  
443 and named. (B) 3D structure of spike glycoprotein trimer in prefusion closed  
444 configuration(PDB ID–6VXX) with red coloured residues showing conserved amino acid  
445 positions in recombinant lineages with at least one omicron variant parent relative to non-

446 recombinant omicron variant lineages. There are 2 insets: Inset 1 – Top view of the spike;  
 447 Inset 2 – Side view of the spike.

448

| Amino acid Position | Wuhan Reference Residue | Recombinant Conserved Residue | Relative Conservation Score | Significance                                                                                                                                                                                                                                                                                                                                                                            | Reference |
|---------------------|-------------------------|-------------------------------|-----------------------------|-----------------------------------------------------------------------------------------------------------------------------------------------------------------------------------------------------------------------------------------------------------------------------------------------------------------------------------------------------------------------------------------|-----------|
| 19                  | T                       | I                             | 1.18                        | T19I: Significant evasion from NTD-targeted neutralizing antibodies (nAbs)                                                                                                                                                                                                                                                                                                              | (34)      |
| 24                  | L                       | -                             | 1.18                        | del24-26+A27S: Loss in neutralization activity of NTD-directed monoclonal antibodies(mAbs)                                                                                                                                                                                                                                                                                              | (34)      |
| 25                  | P                       | -                             | 1.18                        | del25-27 : Significant evasion from NTD-targeted neutralizing antibodies ;<br>del24-26+A27S: Loss in neutralization activity of NTD-directed monoclonal antibodies                                                                                                                                                                                                                      | (33, 34)  |
| 26                  | P                       | -                             | 1.18                        | del25-27 : Significant evasion from NTD-targeted neutralizing antibodies ;<br>del24-26+A27S: Loss in neutralization activity of NTD-directed monoclonal antibodies                                                                                                                                                                                                                      | (33, 34)  |
| 27                  | A                       | S                             | 1.23                        | A27S: Reduce spike sensitivity to neutralization by sera from BNT/BNT vaccinated individuals;<br>del24-26+A27S: Loss in neutralization activity of NTD-directed monoclonal antibodies                                                                                                                                                                                                   | (34, 35)  |
| 213                 | V                       | G                             | 1.13                        | V213G: Reduce spike sensitivity to neutralization by sera from BNT/BNT vaccinated individuals                                                                                                                                                                                                                                                                                           | (35)      |
| 371                 | S                       | F                             | 1.13                        | S317F: Induce large-scale escapes of broad sarbecovirus neutralizing antibodies ;<br>Reduce spike sensitivity to neutralization by BNT/BNT sera in the range of 2 to 5 fold                                                                                                                                                                                                             | (7, 35)   |
| 376                 | T                       | A                             | 1.18                        | T376 mutation helps ACE2 competing antibodies escape                                                                                                                                                                                                                                                                                                                                    | (7)       |
| 405                 | D                       | N                             | 1.17                        | D405N: Significant escape of BA.1 lineage omicron-specific neutralizing antibodies ;<br>Induce large-scale escapes of broad sarbecovirus neutralizing antibodies ;<br>D405 mutation helps ACE2 competing antibodies escape ;<br>Alters the antigenic surface that disrupts the binding of antibodies;<br>The main reason for poor crossreactivity among BA.2/BA.3/BA.4/BA.5 sublineage. | (7)       |
| 408                 | R                       | S                             | 1.2                         | R408S: Induce large-scale escapes of broad sarbecovirus neutralizing antibodies<br>R408 mutation helps ACE2 competing antibodies escape ;<br>Alters the antigenic surface that disrupts the binding of antibodies;                                                                                                                                                                      | (7)       |
| 493                 | Q                       | R                             | 1.23                        | Q493R: Emerges during bamlanivimab/etesevimab cocktail treatment ;<br>Causes resistance to bamlanivimab and etesevimab ;<br>Q493 is critical for binding to Class 2 and 3 antibodies ;<br>Q493 mutations increase binding affinity to the ACE2                                                                                                                                          | (36)      |

449

450 **Table 1: SARS-CoV2 spike relative conserved mutated positions in recombinant**  
 451 **lineages with discovered relevance in viral transmission and immune escape.** Column 1:  
 452 SARS-CoV2 spike relative conserved mutated positions in recombinant lineages; Column 2:  
 453 Wuhan Hu 1 strain reference sequence residue at the conserved positions; Column 3: Amino  
 454 acid residue conserved among recombinant lineages(with at least one omicron variant parent  
 455 lineage) at that relative conserved positions; Column 4: Relative conservation score of each  
 456 conserved position; Column 5: Reported significance of the conserved mutation in the  
 457 relative conserved position; Column 6: References reporting the significance of the conserved  
 458 mutations in the relative conserved positions.

## 459 **DISCUSSION**

460 Genetic recombination is known to occur at different rates among RNA virus families and  
461 plays a crucial role in viral evolution, emergence and epidemiology (19). It has been reported  
462 to contribute to altered viral host-tropism, enhanced virulence, host immune evasion and  
463 development of resistance to antivirals (37). It is very common for Retroviruses and other  
464 positive sense RNA viruses and is rarely observed in the case of negative sense RNA viruses.  
465 In the case of HIV, genetic recombination has contributed to the emergence of highly  
466 prevalent recombinant forms with improved viral fitness(18). Similarly, in the case of HCV,  
467 recombinant lineages have been reported to circulate widely for a prolonged period of time  
468 (38). Among Sarbecoviruses, recombination is commonly observed, although at varying rates  
469 (24, 29). For seasonal human coronaviruses (HCoVs) 229E, HKU1, NL63 and OC43,  
470 frequent recombination is observed between individual genomes and rarely between different  
471 clades (24). It is considered a key contributor to the emergence of new HCoVs including  
472 SARS-CoV, MERS and SARS-CoV-2 (22). Genetic recombination in RNA viruses is akin to  
473 sexual reproduction where a chimeric progeny is generated with shared genetic features from  
474 parental strains. At the molecular level recombination requires genetic sequence similarity  
475 between parents, which allows template switching by the viral RNA polymerase during viral  
476 genome replication. This requires co-infection of the host cell with both parental strains,  
477 which are usually different lineages of the same virus or related viruses, are co-circulating in  
478 the same location and present within the same host (37). In our analysis, we have  
479 demonstrated that increased recombination events observed during the Omicron wave were  
480 not due to higher genomic sampling or co-circulating genetic diversity (Supplementary Fig  
481 2B). We observed that the majority of recombinant lineages emerged in Northern America  
482 and Europe. These geographical regions comprise global travel hotspots, which could  
483 contribute to the introduction and co-circulation of multiple SARS-CoV-2 lineages (39),  
484 which in turn could undergo recombination. Prolonged infection of immunocompromised  
485 individuals can lead to the emergence of new SARS-CoV-2 variants and has been postulated  
486 as responsible for the emergence of Omicron VOC in south Africa (40). Similar events could  
487 also underlie the emergence of recombinant lineages from the individuals with prolonged co-  
488 infection with parent strains. RNA viruses replicate at a rapid rate and have a large  
489 population size to maintain genetic diversity which is necessary to overcome selection  
490 pressure. As a mechanistic by-product of rapid and error-prone replication, they can  
491 accumulate deleterious mutations. Recombination is an evolutionarily conserved mechanism

492 through which RNA viruses purge deleterious mutations (37). Acquisition of advantageous  
493 genetic features through recombination is rarely observed in RNA viruses (37). Interestingly  
494 in our study, we observed genetic fixation of amino acid residues in the key domain of Spike  
495 protein of recombinant Omicron lineages, which can facilitate immune escape.

496

497 The spike protein of SARS-CoV-2 is the key determinant of viral tropism, transmission and  
498 pathogenesis (41, 42). It is also the primary target of host immune response, especially  
499 antibody-mediated neutralization (43). Spike protein binds to the ACE2 receptor on the host  
500 cell surface through its receptor binding domain, which is the main target of neutralizing  
501 antibodies (43). Other domains of Spike, such as the N terminal domain and heptad repeats  
502 are also functionally important and targeted by the host antibodies (44, 45). Through the  
503 course of the COVID-19 pandemic, SARS-CoV-2 has continuously acquired a range of  
504 amino acid changes, which have facilitated resistance to or escape from host antibodies (6-  
505 12). These mutations accumulated more rapidly in the Omicron VOC, allowing escape from  
506 the host and vaccine-mediated immunity and causing widespread infections (6-12). Another  
507 altered feature of the omicron Spike has been amino acid changes that strengthened binding  
508 to ACE2 receptor and enhanced viral transmission (46). In our analysis, we compared the  
509 amino acid conservation in the Spike protein of recombinant Omicron lineage when  
510 compared to non-recombinant Omicron lineages. We found a number of amino acids  
511 relatively conserved in the recombinant Omicron lineages, especially in the RBD and NTD  
512 regions, which have been reported to facilitate escape from neutralizing antibodies (Fig6;  
513 Table 1) (7, 34, 35). Some conserved amino acids were also reported to improve ACE2  
514 binding and/or enhance viral transmission (Table 1) (36). These data suggest an active role of  
515 accelerated recombination during the Omicron wave, in the selection of amino acids that  
516 facilitated escape from host immunity and improved viral fitness. The Spike protein also  
517 happens to be a key target of host T-cell mediated immunity (47). It will be interesting to  
518 examine whether recombination events contributed to the escape of SARS-CoV-2 from T-  
519 cell-mediated cellular immunity as well. A limitation of studies inferring viral evolution  
520 based on genomic surveillance data is the bias introduced due to differences in sampling  
521 intensity across geographical regions. This applies to SARS-CoV-2 as well, where the  
522 disparity in genomic surveillance is obvious (48); hence the conclusions regarding the origin,  
523 prevalence and relative frequency of different lineages must be drawn with caution. At the  
524 same time, this also highlights the paramount importance of the active genomic surveillance

525 of SARS-CoV-2, in humans as well as animal reservoirs, to understand the drivers and  
526 direction of viral evolution.

527

## 528 **Ideas and Speculation**

529 Recombination in RNA virus genomes is executed by viral RNA polymerase, which in turn  
530 requires enzymatic assistance of other non-structural proteins. For SARS-CoV-2 the NSP14  
531 exonuclease has been reported to play a key role in genetic recombination (31). In the case of  
532 SARS-CoV-2, we observed an amino acid change I42V, which was conserved in Omicron  
533 lineage and not found in other VOCs (Sup Figure 4). 3D modelling of the enzyme shows  
534 residue 42 is not proximal to the RNA binding pocket. Nevertheless, it will be interesting to  
535 examine whether this I42V change has any forbearance on enhanced recombination rates  
536 observed among SARS-CoV-2 of Omicron lineages. Another interesting observation of our  
537 study is the concentration of recombination breakpoints in the 3' UTR of the parent lineages.  
538 This region serves as the initiation point for viral genome replication and has important  
539 regulatory roles in the same (49). It will be important to explore if there are specific sequence  
540 and RNA secondary changes in the 3' UTR of the Omicron lineages SARS-CoV-2, which  
541 could be responsible for accelerated recombination. Furthermore, recombination can lead to  
542 a genetic shift allowing the virus to jump the host-species barrier between animal reservoirs  
543 and humans, resulting in an outbreak (22, 50). It is well established that SARS-CoV-2 has  
544 now spread to a range of non-human species, however genomic surveillance in these species  
545 is very limited (50, 51). Although the prevalence of recombinant SARS-CoV-2 lineages  
546 remains low currently, considering the enhanced frequency of recombination events and  
547 expanded host range of SARS-CoV-2, it is a matter of concern vis-à-vis the emergence of  
548 new VOCs in future, especially from Zoonotic origin.

549

## 550 **MATERIALS AND METHODS**

### 551 **Sequences, metadata and protein structure retrieval**

552 Recombinant Sequences - All Recombinant lineage sequences with a collection date between  
553 1<sup>st</sup> November 2019 and 14<sup>th</sup> July 2022 were retrieved from the GISAID database on 14<sup>th</sup> July  
554 2022 (26). These were filtered to discard incomplete sequences with lengths less than 29000  
555 nucleotides, gapped sequences having more than 5% ambiguous nucleotide positions, and

556 sequences with no sequence collection date information available. Corresponding sequence  
557 metadata information was also retrieved from the same database.

558 Control Sequences - All 1,206,055 complete SARS-CoV2 sequences (Taxid: 2697049)  
559 deposited in the NCBI Virus database (27), isolated between 31<sup>st</sup> October 2019 and 14<sup>th</sup> July  
560 2022 were retrieved on 14<sup>th</sup> July 2022 with appropriate filters including 1) genome size  
561 should be between 29000 and 31000 nucleotides, 2) sequences with more than 1% of  
562 ambiguous nucleotides positions are avoided, 3) sequences isolated from lab hosts are  
563 avoided. Corresponding sequence metadata information including geographic location,  
564 country of isolation, length of the sequence, collection date of the sequence and pangolin  
565 lineage of the sequence were retrieved from the same database.

566 Reference Sequence - Wuhan Hu-1 reference strain genome sequence, all ORF nucleotide  
567 sequences and Nsp10, Nsp12, Nsp13 and Nsp14 protein sequences were retrieved from the  
568 NCBI database (52).

569 Protein Structure - 3-D structures of SARS-CoV2 spike in prefusion closed (PDB ID :  
570 6VXX) and Nsp14 protein in complex with Nsp10 and RNA (PDB ID : 7N0B) were  
571 retrieved in .pdb format from Protein Data Bank (PDB) (53-55).

## 572 **Analysis, segregation and scoring of sequences**

573 Sequences collected from both GISAID as well as NCBI Virus databases were independently  
574 segregated and clustered into separate lineages using the Phylogenetic Assignment of Named  
575 Global Outbreak LINEages (PANGOLIN) assignment tool (26, 27, 56, 57). PANGOLIN tool  
576 updated to the latest version of v4.1.2 was utilised, with Constellations version v0.1.10 and  
577 Scorpio version v0.3.17. PANGOLIN data was updated to the latest release version v1.8.  
578 After lineage segregation and clustering, sequences categorised as lineage unassigned by the  
579 PANGOLIN tool were discarded.

580 NextClade with the latest SARS-CoV2 dataset was utilised to score lineage segregated  
581 sequences based on overall quality control scores (QC score), both for recombinant as well as  
582 a control set of sequences(58) (<https://clades.nextstrain.org>). Overall QC score is an  
583 aggregated score compiling individual missing data score, mixed sites score, private  
584 mutations score, mutation clusters score, scoring based on premature stop codons and  
585 frameshifts score. Sequences with bad and mediocre scores were discarded, and further best  
586 three sequences with 'good' QC categorisation from each lineage were extracted into separate

587 files. These sequences were further utilised for phylogenetic analysis, spike inter-recombinant  
588 mutation mapping and recombination analysis.

### 589 **Phylogenetic analysis of the sequences**

590 Wuhan Hu-1 reference strain genome sequence, the best overall QC scoring sequence from  
591 each control lineage with recombinant lineages removed and the top 3 overall QC scoring  
592 sequences from each recombinant lineage together underwent masking and multiple sequence  
593 alignment using the alignment option of the PANGOLIN tool (57). The maximum likelihood  
594 tree was inferred using IQ-TREE 2 utilising the GTR+ $\Gamma$  model of nucleotide substitution,  
595 minimum branch length of 0.000000001 nucleotide substitutions persite and ultrafast  
596 bootstrapping with 1000 replicates (59, 60). The phylogenetic tree was rooted in the A  
597 lineage which is closest to RatG13 (29).

### 598 **Identification and Visualisation of Recombination Breakpoints and parent lineages**

599 The top 3 overall QC score sequences from all potential parent lineages and corresponding  
600 recombinant lineages together underwent multiple sequence alignment using  
601 MAFFT(Multiple Alignment using Fast Fourier Transform) automatic configuration(61).  
602 Mosaic structure and recombination breakpoint regions between these aligned sequence's  
603 parent and recombinant lineages were detected using 3SEQ (62). If 3SEQ was unable to find  
604 the parent then, potential parent lineages used to find the breakpoint region were sequentially  
605 subsampled and breakpoints with those subsampled parents were detected. In cases where  
606 3SEQ failed even after subsampling, then we tried predicting parent and breakpoint regions  
607 with RDP5 in the default configuration (63).

608 Recombination events were visually verified using a snipit  
609 (<https://github.com/aineniambh/snipit>). For each recombinant lineage, the top three overall  
610 QC scoring sequences from both identified parent lineages, reference (Wuhan Hu-1 strain)  
611 genome sequence and top three best QC scoring corresponding recombinant lineage  
612 sequences underwent multiple sequence alignment using MAFFT followed by visualisation  
613 of single nucleotide polymorphisms relative to the reference sequence using snipit  
614 tool(61),(<https://github.com/aineniambh/snipit>). Region inherited from one of the parents in  
615 both recombinant lineage sequences as well as that parent sequences were manually marked  
616 for each recombinant lineage visualising the recombination event.

617 **Lineage consensus sequence generation and mapping of inter-lineage sequence**  
618 **polymorphisms**

619 The top 5 overall QC scoring sequences from all lineages(both recombinant and non-  
620 recombinant) were extracted and stored in separate files. These sequences were aligned  
621 separately using MAFFT in automatic configuration (61). These aligned sequences were  
622 trimmed with parameter -gt 0.5 to remove all amino acid positions which are gaps in more  
623 than 50 percent of sequences(64). This trimmed sequences underwent consensus sequence  
624 generation with gap filling using an in-house generated program scripted in R. Blastn was  
625 used to identify each of the ORF sequence start and end points in recombinant lineage  
626 consensus sequences(65). These sequences together with Wuhan Hu 1 reference sequence  
627 were aligned using MAFFT in automatic configuration and inter-lineage nucleotide  
628 polymorphism was identified using Rstudio(61, 66). Scripts for the same are available.

629 For each of the 31 recombinant lineages and other non-recombinant lineages, the lineage  
630 consensus sequence was used as subject sequence libraries, with the Wuhan Hu-1 reference  
631 sequence of each ORFs as the query sequence and the following blastn parameters of -  
632 subject\_besthit, -max\_hsp 1, -gap open 0 and -gap extend 0. In each of these blastn output  
633 files, one nucleotide position is subtracted from the start position to make it into a bed file  
634 suitable for bedtools (67). ORF sequences from each of the 31 recombinant lineages  
635 consensus sequences were extracted using bedtools providing the above-generated bed file  
636 coordinates. Frameshift was introduced in ORF1b of each of the recombinant lineages.

637 ORF sequences from each of the lineages and the reference Wuhan Hu 1 ORF sequences  
638 were translated into a protein sequence using EMBOSS Transeq tool, multiple sequences  
639 aligned using MAFFT in automatic configuration, and inter-lineage amino acid  
640 polymorphism identified using Rstudio(61, 66).

641 **Residue conservation analysis and 3D structural visualisation**

642 Spike sequences from each of the lineages' consensus sequences were extracted using  
643 bedtools providing above generated bed file coordinates. Consensus spike sequence from  
644 each of the lineages was translated into a protein sequence using EMBOSS Transeq tool (66).  
645 These control lineages spike sequences and recombinant lineages spike sequences were  
646 together aligned using MAFFT using automatic configuration and trimmed using trial with  
647 parameters -gt 0.5(61). Omicron lineage spike sequences without recombinant lineages and  
648 recombinant lineage spike sequences were extracted and split into two respective files.



649 Conservation scores of each residue of spike recombinant lineages with at least one omicron  
650 parent relative to omicron were calculated in Rstudio utilising a customised version of  
651 conserv function in Bio3D package (68).

652 3D structure of the spike in prefusion closed structure(PDB ID : 6VXX) and Nsp14 in  
653 complex with Nsp10 and RNA(PDB ID : 7N0B) retrieved from PDB were visualised using  
654 CHIMERAX (53-55, 69).

## 655 **Graphical Visualisation and analysis**

656 All graphical images were plotted and visualised using RStudio. Packages including ggmap  
657 (<https://github.com/dkahle/ggmap>), map (<https://CRAN.R-project.org/package=maps>),  
658 RColorBrewer (<https://CRAN.R-project.org/package=RColorBrewer>), scales  
659 (<https://CRAN.R-project.org/package=scales>), gridExtra ([https://CRAN.R-](https://CRAN.R-project.org/package=gridExtra)  
660 [project.org/package=gridExtra](https://CRAN.R-project.org/package=gridExtra)), scatterpie ([https://CRAN.R-](https://CRAN.R-project.org/package=scatterpie)  
661 [project.org/package=scatterpie](https://CRAN.R-project.org/package=scatterpie)), ggtree, treeio, tidyverse, treedataverse, writexl  
662 (<https://CRAN.R-project.org/package=writexl>), seqinr ([https://CRAN.R-](https://CRAN.R-project.org/package=seqinr)  
663 [project.org/package=seqinr](https://CRAN.R-project.org/package=seqinr)), zoo (<https://CRAN.R-project.org/package=zoo>) and  
664 Biostrings (<https://bioconductor.org/packages/Biostrings>) were utilised for data analysis  
665 and visualisation. Scripts for the same are available (70-72)

## 666 **Acknowledgments**

667 We gratefully acknowledge all data contributors, i.e., the Authors and their Originating  
668 laboratories responsible for obtaining the specimens, and their Submitting laboratories for  
669 generating the genetic sequence and metadata and sharing via the GISAID Initiative, on  
670 which this research is based. 3D structural visualisations performed using UCSF ChimeraX,  
671 developed by the Resource for Biocomputing, Visualization, and Informatics at the  
672 University of California, San Francisco, with support from National Institutes of Health R01-  
673 GM129325 and the Office of Cyber Infrastructure and Computational Biology, National  
674 Institute of Allergy and Infectious Diseases. This work is supported by research grants from  
675 Crypto Fund, SERB, and DBT-BIRAC to ST Lab. RS is supported by fellowship support  
676 from CSIR.

## 677 **Competing Interests**

678 Authors have no competing interests.

679 SUPPLEMENTARY FIGURES & TABLES

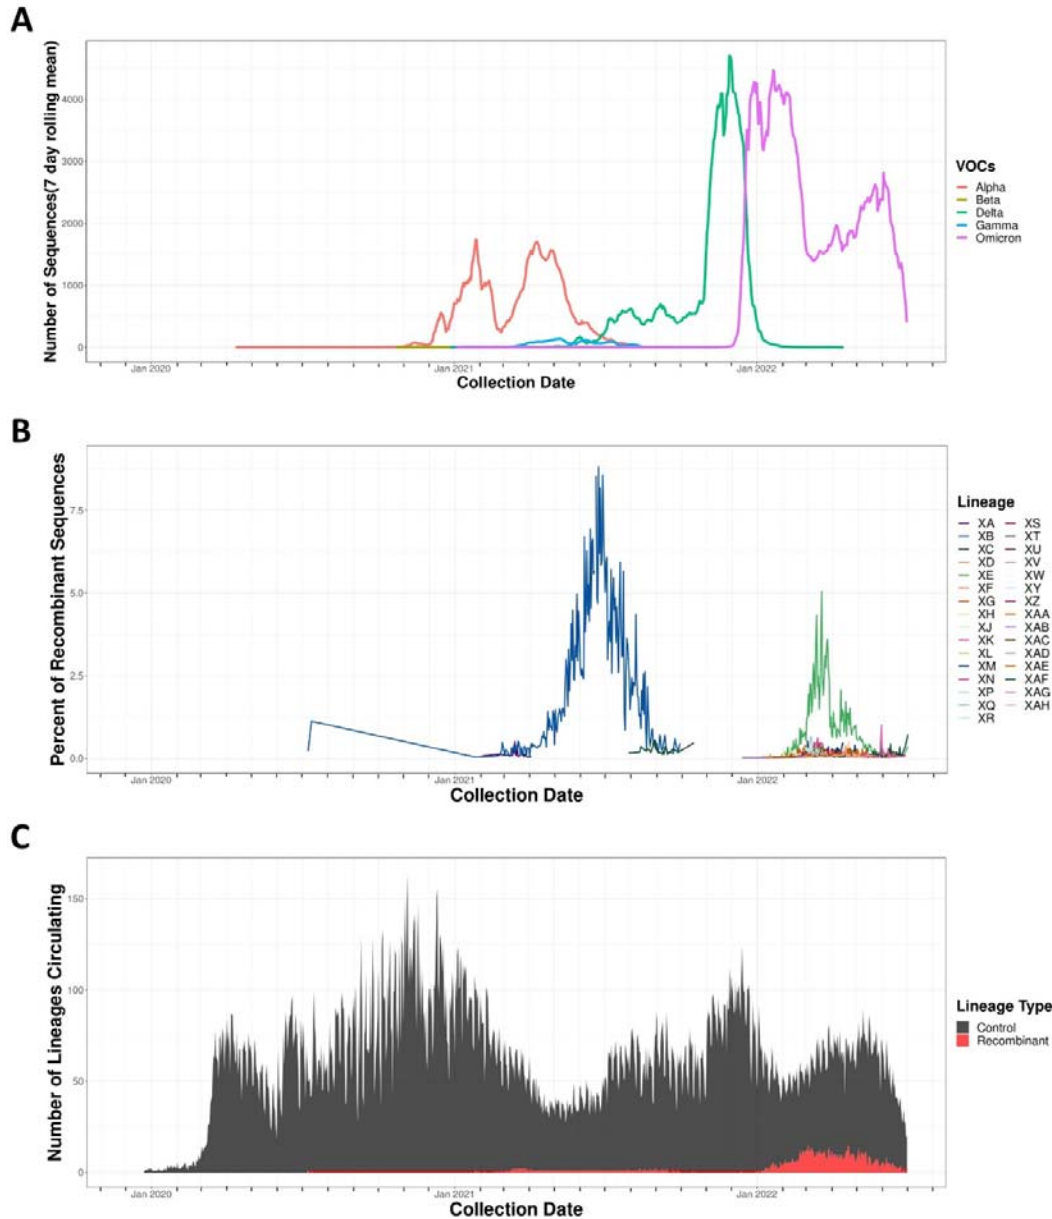

680 **Supplementary Figure 1: Temporal Distribution of SARS-CoV2 VOCs sequences,**  
681 **percentage temporal distribution of SARS-CoV2 recombinant lineage sequences and a**  
682 **daily number of lineages circulating:** (A) Prevalence of SARS-CoV2 variants of  
683 concerns(VOC) with X-axis showing date of sequence collection, Y-axis showing several  
684 sequences collected and deposited in 7 days rolling average. Different VOCs are represented  
685 in unique colours. (B) Percentage of sequences belonging to each recombinant lineage with  
686 X-axis and Y-axis same as that of Supplementary Figure 1A. Different recombinant lineages  
687 are represented in unique colours which is the same as that used to represent recombinant  
688 lineages in FIG1A. (C) Area curve showing the number of unique lineages prevalent daily,  
689 with the X-axis representing the collection date of the lineage sequence, the Y-axis

690 representing the number of unique lineages circulating each day and colours representing the  
691 type of lineage(recombinant – red, all lineages – dark grey. X axis of all three graphs ranges  
692 from 1<sup>st</sup> December 2019 to 1<sup>st</sup> July 2022 with axis ticks indicating months and are aligned  
693 making them temporally comparable to each other.

694

695

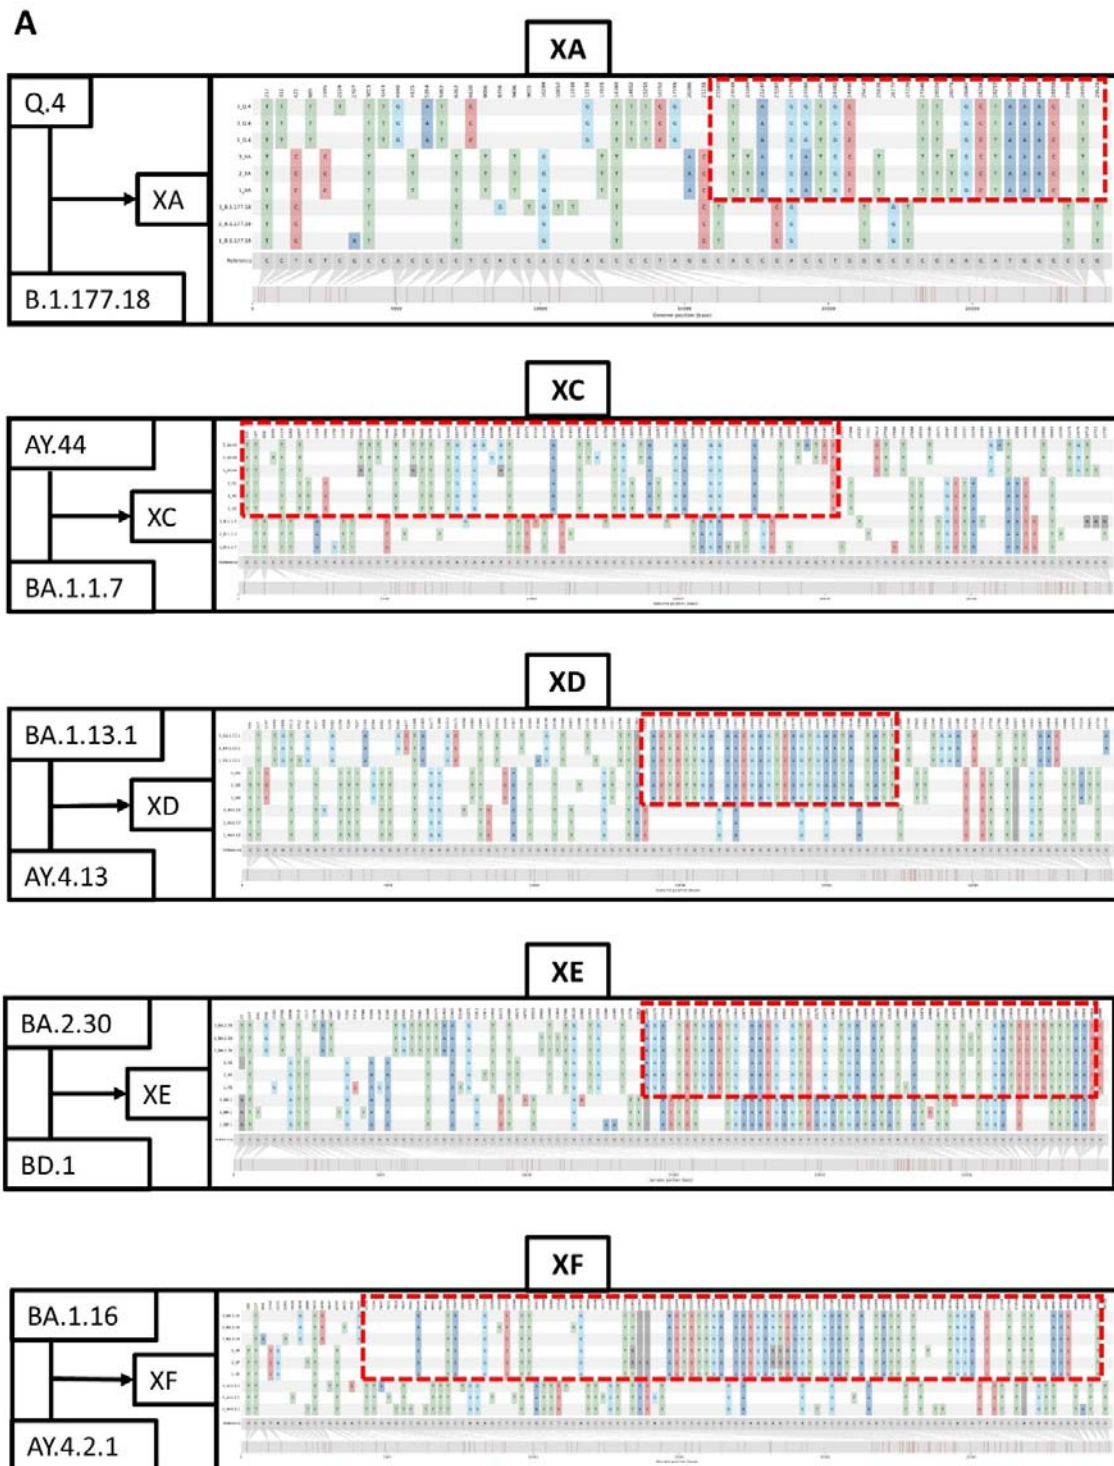



700

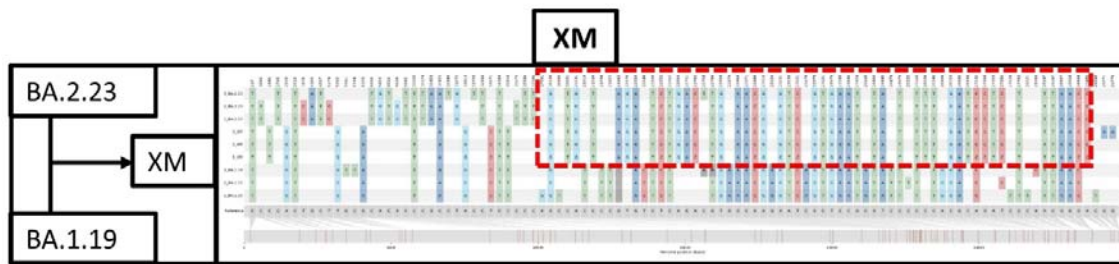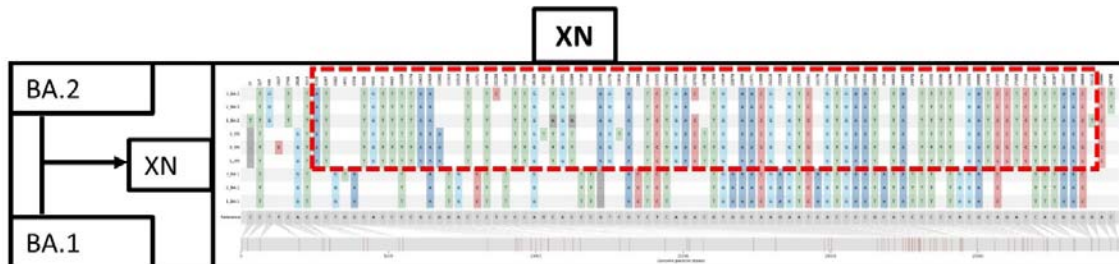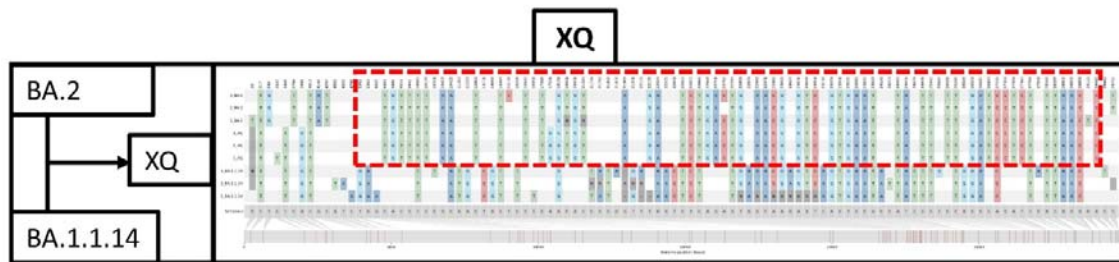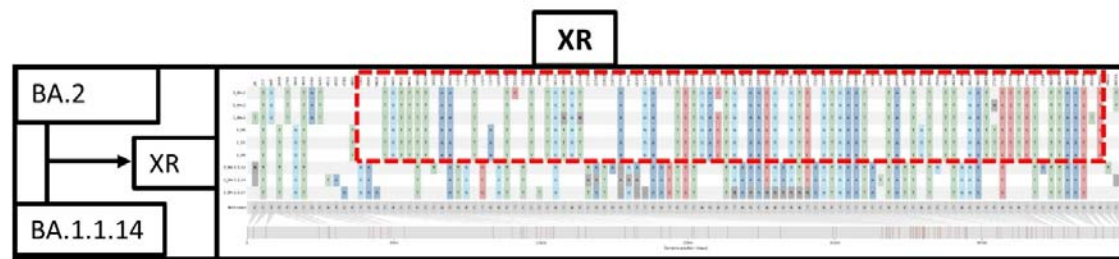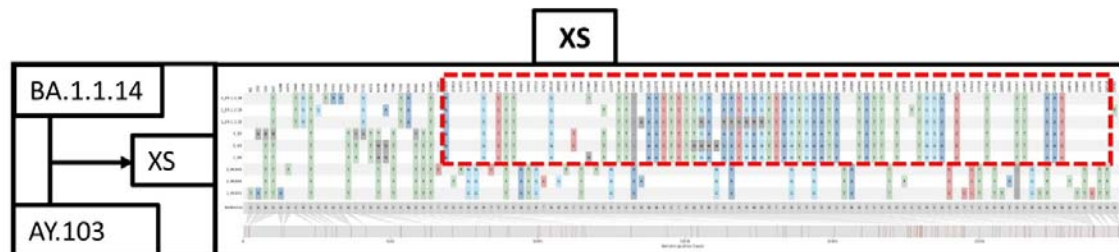

701

702

703

704

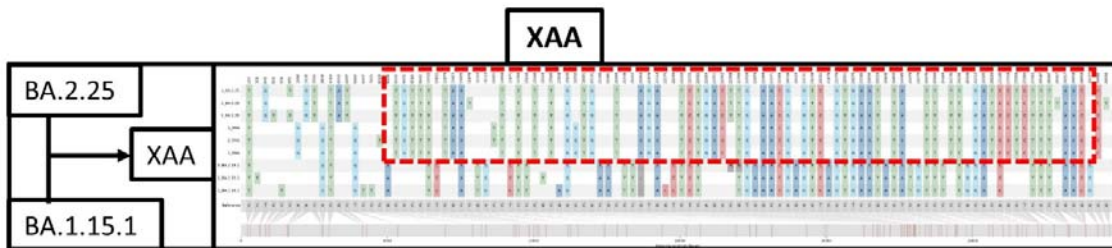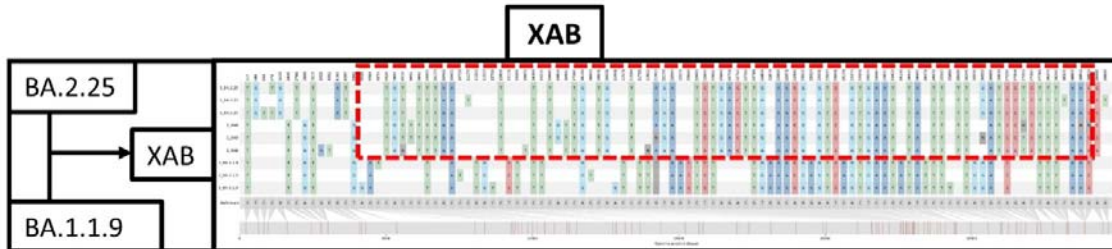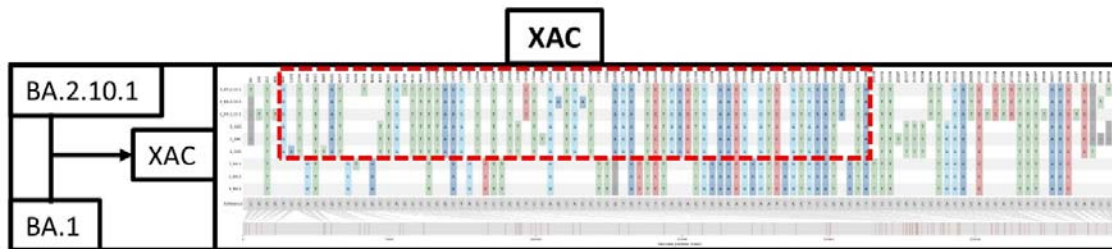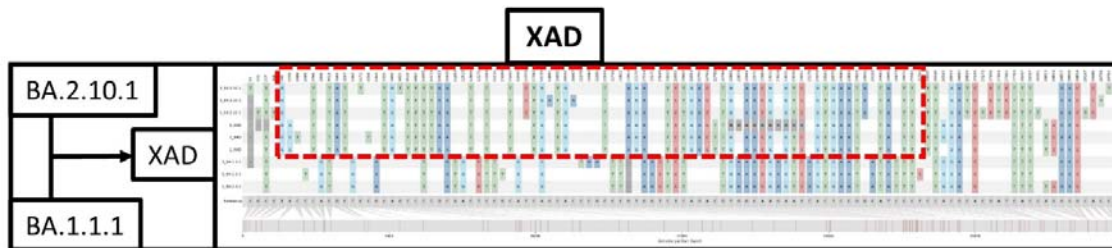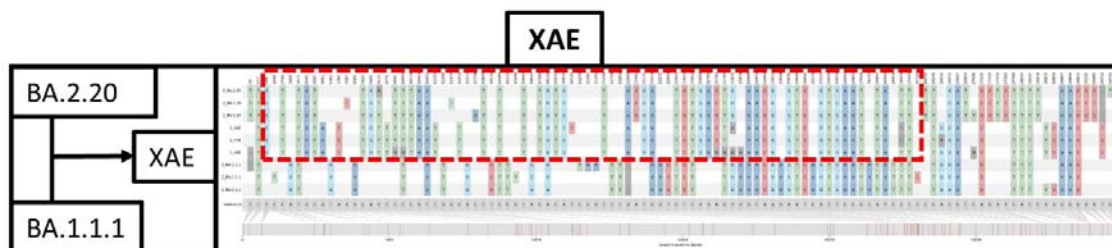

705

706

707

708

709

710

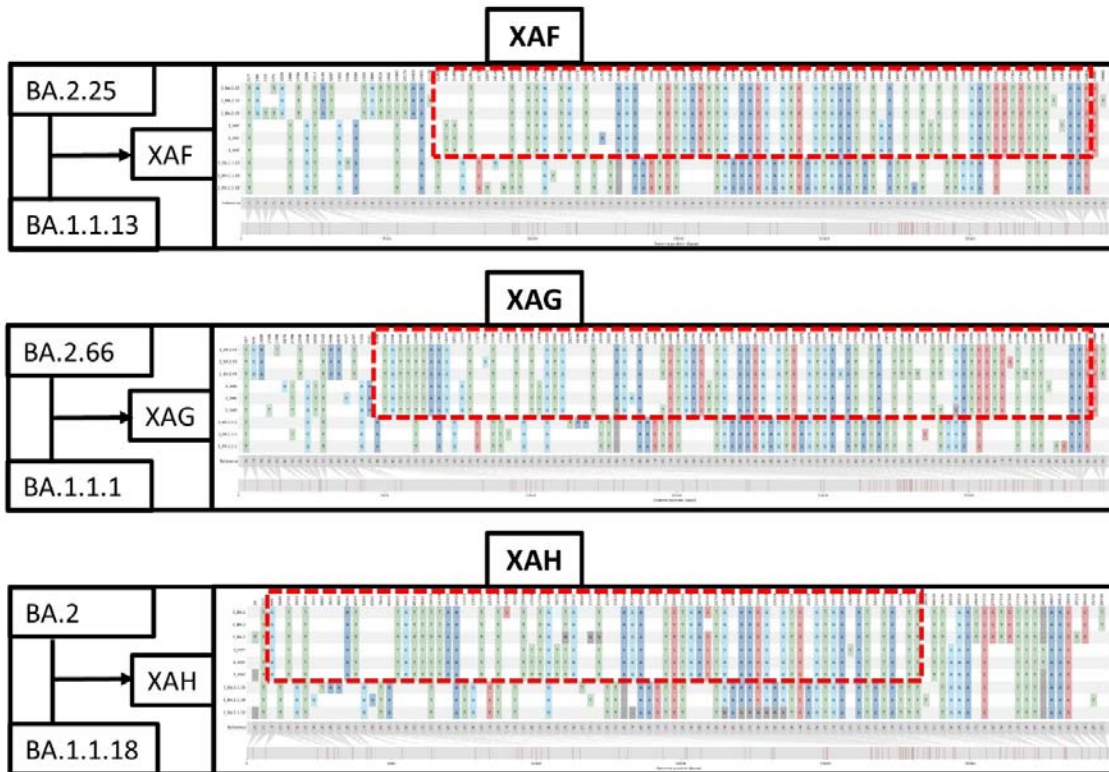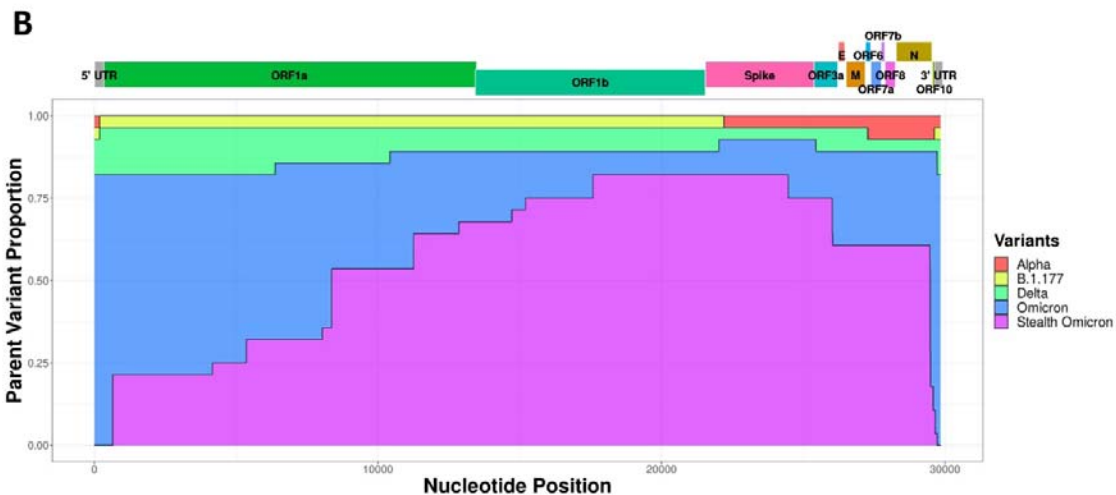

711

712 **Supplementary Figure 2: Genome Single Nucleotide Polymorphisms distribution of**  
 713 **recombinant lineages and their identified parental lineages showing mosaicism and**  
 714 **parent variant proportion distribution in recombinant lineages: (A)** Single nucleotide  
 715 polymorphisms patterns in recombinant lineage sequences and parental lineage sequence with  
 716 respect to reference Wuhan Hu 1 strain nucleotide sequence using snipit. Top three sequences  
 717 represent parent 1, middle three sequences belong to corresponding recombinant lineage  
 718 sequence, and bottom three sequence are parent 2 lineage sequences. Red rectangular box in  
 719 each image with broken lines represents minimum region in recombinant lineage inherited  
 720 from parent 1 as predicted by 3SEQ with rest of the recombinant lineage region inherited

721 from parent 2 lineage. Black box to the right have names of the parent and recombinant  
 722 lineages mentioned in text boxes with arrows directing from parents to recombinant lineage.  
 723 (B) For each nucleotide position in the genome, proportions of recombinant lineages  
 724 inheriting that nucleotide position from each parent lineage are represented in a stacked area  
 725 curve. X axis shows genome nucleotide position, Y axis shows parent variant proportion  
 726 distribution. Different colours represent the proportion contributed by different variants  
 727 While 5' and 3' Untranslated Regions (UTRs) are mapped and marked on top in dark grey,  
 728 each of the 12 ORF regions are represented in different colours including ORF1a, ORF1b,  
 729 Spike, ORF3a, E(Envelope), M(Membrane), ORF6, ORF7a, ORF7b, ORF8, N(Nucleocapsid  
 730 Protein) and ORF10.

731

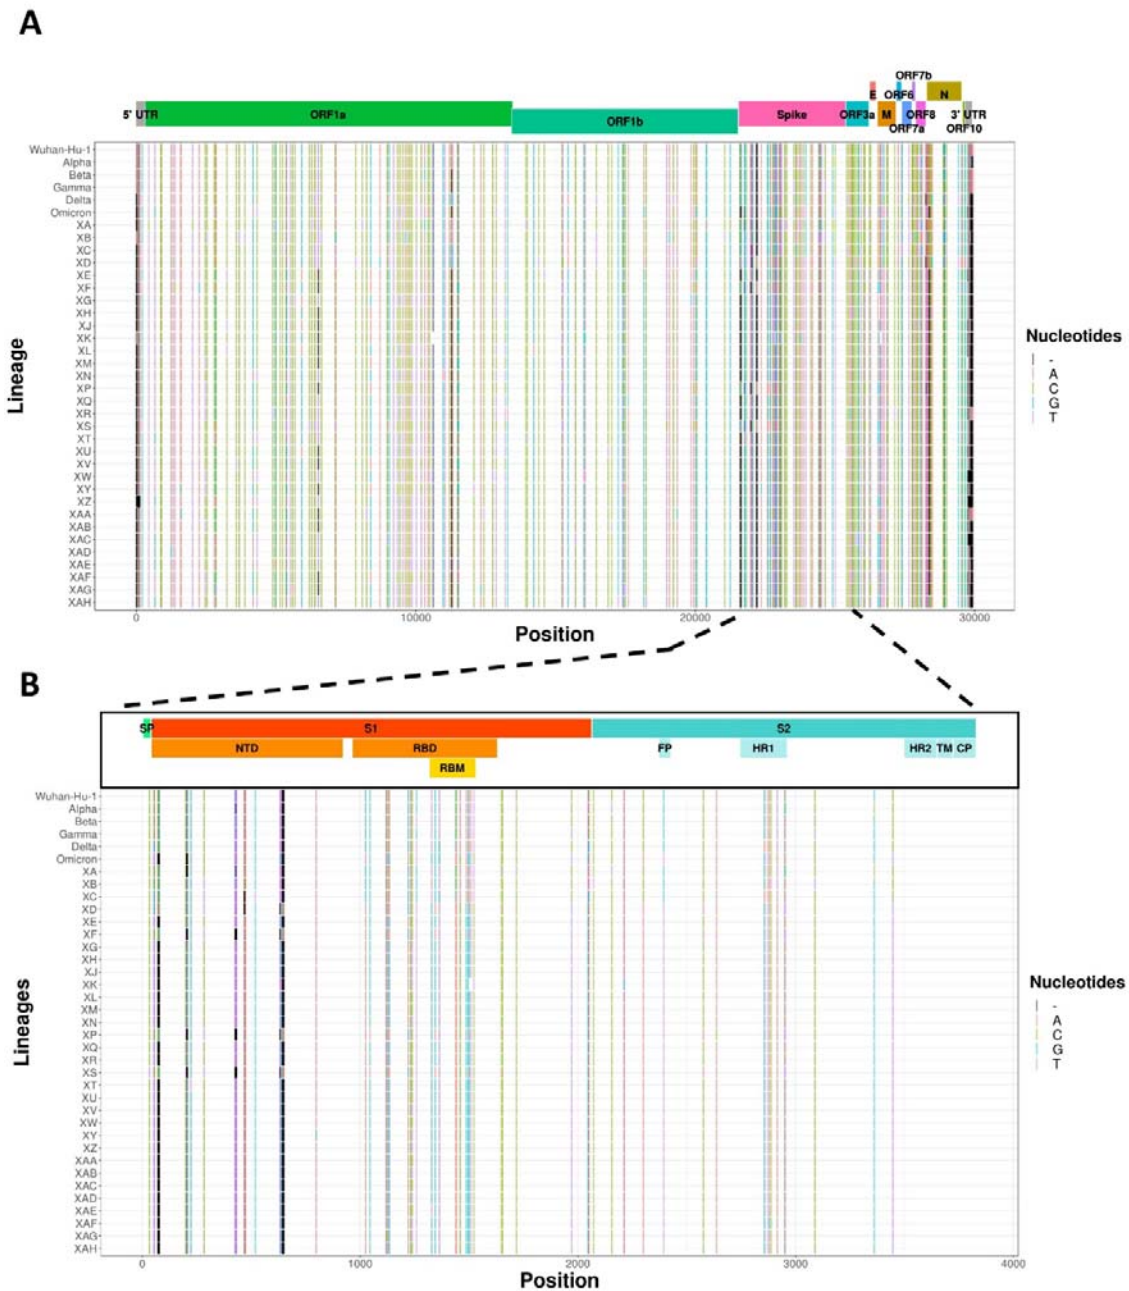



732 **Supplementary Figure 3: SARS-CoV2 genome inter-recombinant lineage nucleotide**  
733 **polymorphic sites with the spotlight on spike :** (A) SARS-CoV2 polymorphic nucleotide  
734 positions mapping with X-axis representing nucleotide position in the genome, Y-axis  
735 representing lineages, nucleotides in the inter-recombinant lineage polymorphic positions  
736 marked using “[ ]”, with black indicating a gap in the nucleotide position and different colours  
737 representing different nucleotides (Colour legends mark nucleotides with one letter codes).  
738 Corresponding nucleotides in the inter-recombinant lineage polymorphic sites of Wuhan-Hu-  
739 1 strain, Alpha variant(B.1.1.7 lineage), Beta variant(B.1.351 lineage), Gamma variant(P.1  
740 lineage), Delta variant(B.1.617.2 lineage) and omicron variant(B.1.1.529 lineage) are  
741 included for comparison. While 5’ and 3’ Untranslated Regions(UTRs) are mapped and  
742 marked on top in dark grey, each of the 12 ORF regions is represented in different colours  
743 including ORF1a, ORF1b, Spike, ORF3a, E(Envelope), M(Membrane), ORF6, ORF7a,  
744 ORF7b, ORF8, N(Nucleocapsid Protein) and ORF10. (B) SARS-CoV2 Spike ORF inter-  
745 recombinant lineage nucleotide polymorphic sites with both X-axis, Y-axis and colour  
746 schemes for nucleotides remaining the same as Supplementary Figure 3A. Spike ORF sub-  
747 regions were mapped and marked on top. Regions marked include SP(Signal Peptide), S1,  
748 S2, NTD(N-Terminal Domain), RBD(Ribosome Binding Domain), RBM(Ribosome Binding  
749 Motif), FP(Fusion Peptide), HR1(Heptad Repeat 1), HR2(Heptad Repeat 2),  
750 TM(Transmembrane region) and CP(Cytoplasmic region). Different colours mark different  
751 spike subregions with S1 and subregions represented in shades of orange, while S2 and sub-  
752 regions are represented in shades of cyan.

753

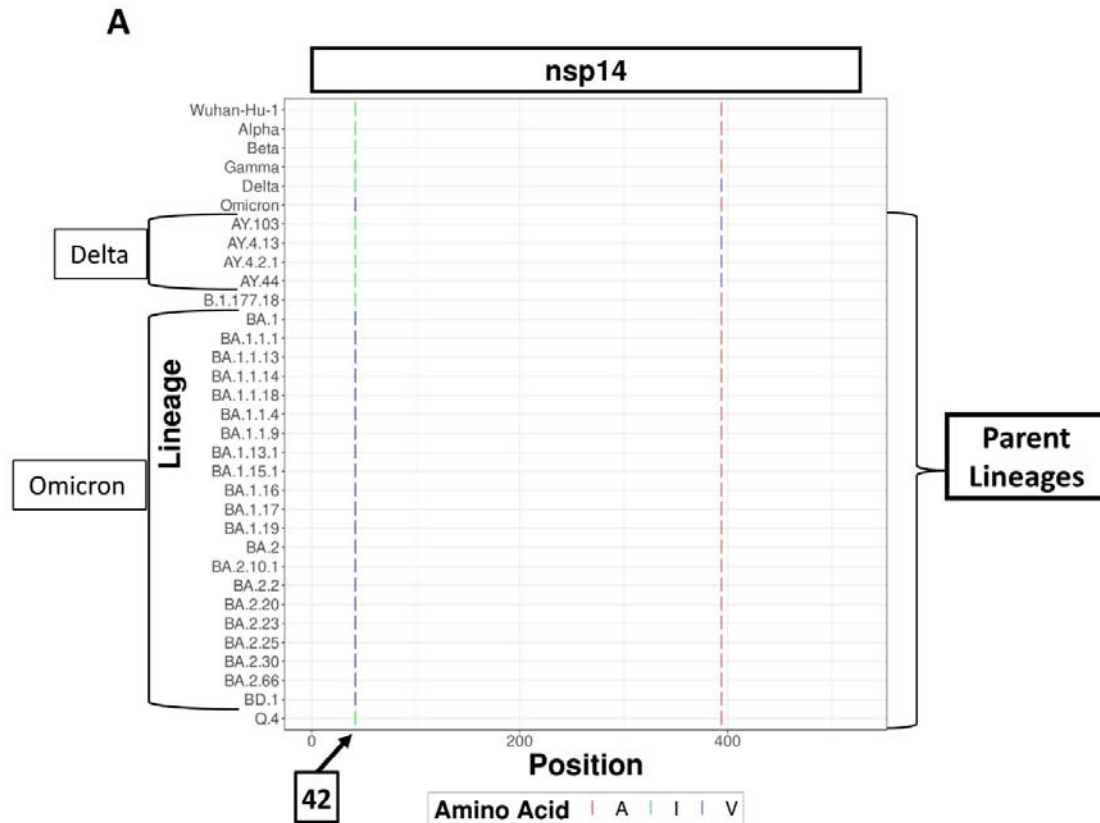

**B**

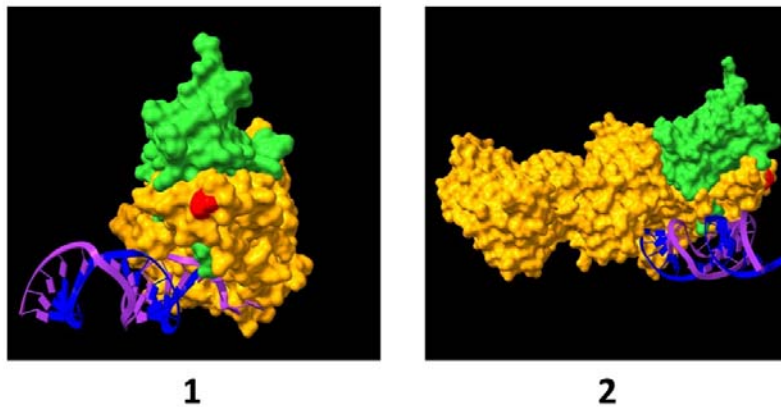

754 **Supplementary Figure 4: SARS-CoV2 Nsp14 recombinant parent lineage amino acid**  
 755 **polymorphism compared to VOCs :** (A) Recombinant parent Inter-lineage amino acid polymorphic  
 756 positions in Nsp14 with respect to reference Wuhan-hu 1 strain sequence, Alpha Variant(B.1.1.7),  
 757 Beta Variant(B.1.351), Gamma Variant(P.1), Delta Variant(B.1.617.2) and Omicron  
 758 Variant(B.1.1.529) were marked with “|”, with different colours representing different amino  
 759 acids(Colour legends mark amino acids with one letter amino acid codes).X axis represent amino acid  
 760 position and Y axis represent lineages. Amino acid residue specifically conserved in omicron is named  
 761 and pointed on the x-axis. (B) 3D structural visualisation of SARS-CoV2 Nsp10-Nsp14-RNA  
 762 complex showing amino acid position conserved over all the omicron recombinant parent genomes.  
 763 Here orange coloured residues represent Nsp14, lime-green-coloured residues represent Nsp10,  
 764 magenta-coloured RNA strands represent Template strand(T-strand), blue-coloured RNA strands  
 765 represent Product strand(P-strand) and red-coloured residues show the conserved residues in Nsp14.  
 766 There are 2 insets: Inset 1 – Top view of Nsp10-Nsp14-RNA complex(PDB ID–7N0B); Inset 2 – Side  
 767 view of Nsp10-Nsp14-RNA complex(PDB ID–7N0B).

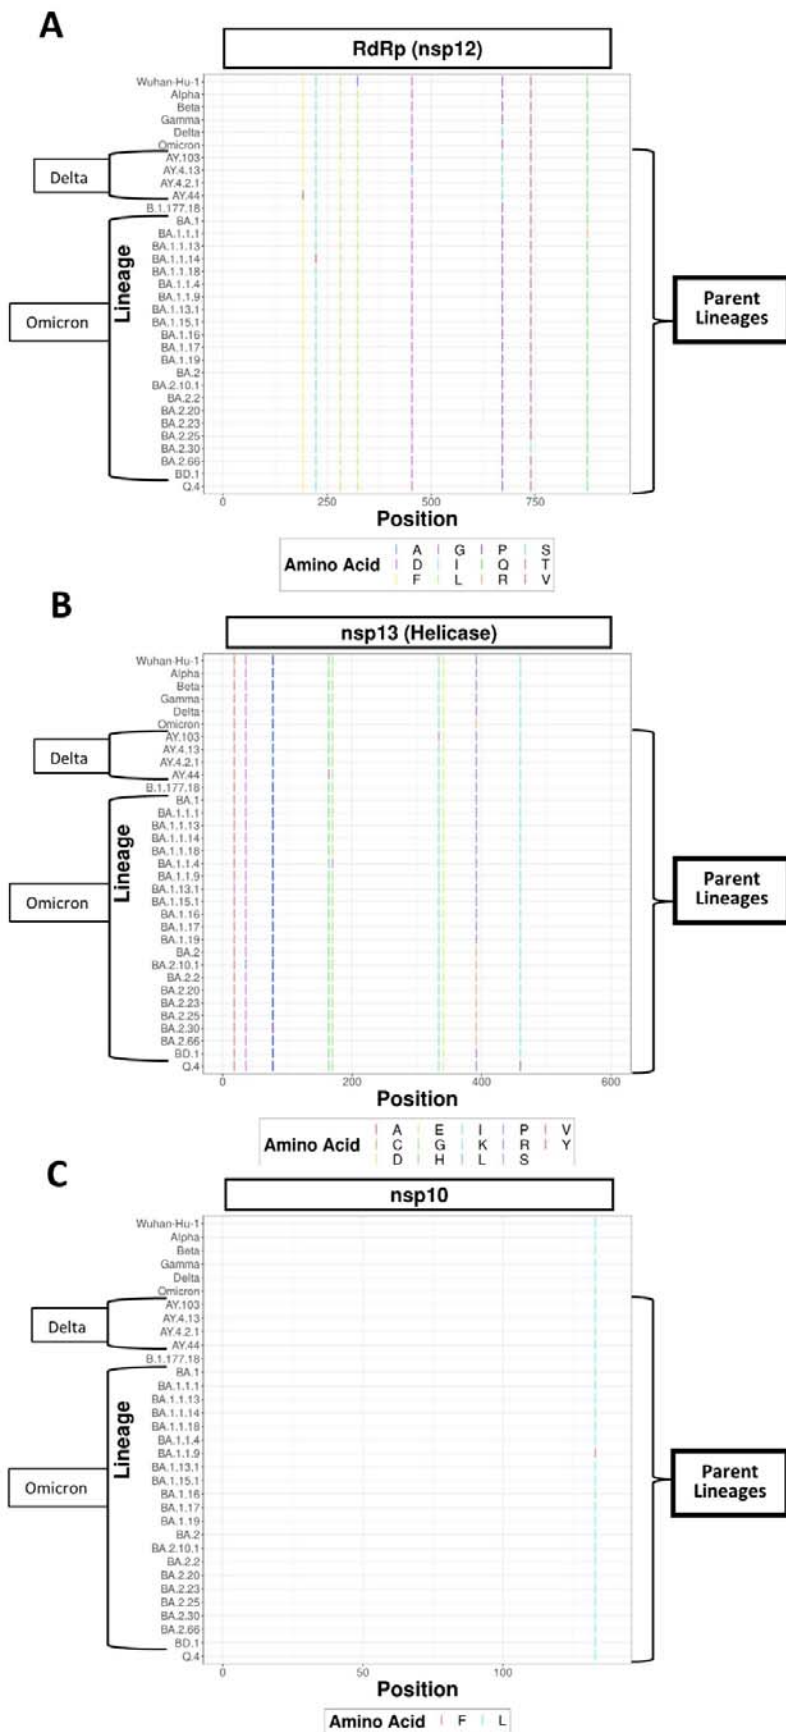

769 **Supplementary Figure 5: SARS-CoV2 RdRp, Helicase and Nsp10 recombinant parent lineage**  
 770 **amino acid polymorphism compared to VOCs:** Recombinant parent Inter-lineage amino acid  
 771 polymorphic positions in the respective protein with respect to reference Wuhan-hu 1 strain sequence,  
 772 Alpha Variant(B.1.1.7), Beta Variant(B.1.351), Gamma Variant(P.1), Delta Variant(B.1.617.2) and  
 773 Omicron Variant(B.1.1.529) were marked with “|”, with different colours representing different amino  
 774 acids(Colour legends mark amino acids with one letter amino acid codes) X axis represent amino acid  
 775 position and Y axis represent lineages.. Legends are positioned to the bottom of each of the figures (A)  
 776 Nsp12 (RdRp) (B) Nsp13 (Helicase) (C) Nsp 10

777

| Sl.No | Recombinant | Parent 1   | Parent 2  | Breakpoint 1 | Breakpoint 2 | Minimum Recombination Length | Corrected P-Value |
|-------|-------------|------------|-----------|--------------|--------------|------------------------------|-------------------|
| 1     | XA          | B.1.177.18 | Q.4       | 21231-22202  | 29621-29842  | 7419                         | 1.610225e-04      |
| 2     | XC          | B.1.1.7    | AY.44     | 0-185        | 27273-27613  | 2189                         | 6.708708e-03      |
| 3     | XD          | AY.4.13    | BA.1.13.1 | 21971-22026  | 25445-25559  | 3416                         | 1.613894e-11      |
| 4     | XE          | BD.1       | BA.2.30   | 10423-11262  | 29477-29833  | 10393                        | 1.055551e-05      |
| 5     | XF          | AY.4.2.1   | BA.1.16   | 5362-6377    | 29718-29842  | 5331                         | 7.833950e-04      |
| 6     | XG          | BA.1.17    | BA.2      | 5900-8368    | 29477-29735  | 5937                         | 4.943610e-02      |
| 7     | XH          | BA.1.1.4   | BA.2      | 10423-11262  | 29721-29735  | 10433                        | 2.180247e-05      |
| 8     | XJ          | BD.1       | BA.2.23   | 13171-14720  | 29486-29842  | 13123                        | 1.742797e-06      |
| 9     | XK          | BA.1.19    | BA.2.23   | 17377-17581  | 29581-29833  | 11887                        | 7.295525e-06      |
| 10    | XL          | BD.1       | BA.2.30   | 5900-8368    | 29477-29833  | 5873                         | 2.087721e-02      |
| 11    | XM          | BA.1.19    | BA.2.23   | 17377-17581  | 29581-29833  | 11965                        | 1.950017e-07      |
| 12    | XN          | BA.1       | BA.2      | 2808-4159    | 29468-29726  | 2840                         | 2.021308e-02      |
| 13    | XQ          | BA.1.1.14  | BA.2      | 4297-5361    | 29653-29735  | 4329                         | 1.044316e-02      |
| 14    | XR          | BA.1.1.14  | BA.2      | 4297-5361    | 29653-29735  | 4329                         | 1.044316e-02      |
| 15    | XS          | AY.103     | BA.1.1.18 | 9029-10424   | 29724-29848  | 8490                         | 7.608834e-07      |
| 16    | XT          | BA.1       | BA.2      | 0-645        | 26027-26496  | 3099                         | 1.170613e-03      |
| 17    | XU          | BA.1.17    | BA.2.30   | 5900-8368    | 29486-29842  | 5886                         | 3.232664e-02      |
| 18    | XV          | BA.1.1.4   | BA.2.2    | 13162-15206  | 29477-29833  | 13113                        | 1.235832e-06      |
| 19    | XY          | BA.1.1.13  | BA.2.25   | 11513-12855  | 29486-29842  | 11422                        | 1.587070e-06      |
| 20    | XZ          | BA.1       | BA.2      | 0-645        | 26036-26505  | 3084                         | 1.793280e-04      |
| 21    | XAA         | BA.1.15.1  | BA.2.25   | 5362-8368    | 29477-29833  | 5335                         | 2.156955e-02      |
| 22    | XAB         | BA.1.1.9   | BA.2.25   | 5362-8037    | 29477-29833  | 5331                         | 6.071835e-03      |
| 23    | XAC         | BA.1       | BA.2.10.1 | 464-645      | 24470-26026  | 4194                         | 3.870232e-02      |
| 24    | XAD         | BA.1.1.1   | BA.2.10.1 | 464-645      | 26027-26496  | 3651                         | 1.828807e-02      |
| 25    | XAE         | BA.1.1.1   | BA.2.20   | 20-645       | 24470-26026  | 3484                         | 9.056439e-03      |
| 26    | XAF         | BA.1.1.13  | BA.2.25   | 10423-11262  | 29477-29833  | 10341                        | 4.120909e-06      |
| 27    | XAG         | BA.1.1.1   | BA.2.66   | 5362-8368    | 29468-29582  | 5508                         | 4.731625e-02      |
| 28    | XAH         | BA.1.1.18  | BA.2      | 20-645       | 26027-26496  | 3210                         | 2.533694e-02      |

778

779 **Supplementary Table 1:** Identified best recombination parent lineages and breakpoint regions of  
 780 each recombinant lineages inferred according to 3SEQ.Column 1: Serial number; Column 2:  
 781 Recombinant lineage that results from recombination; Column 3: First Parent lineage involved in  
 782 recombination; Column 4: Second Parent lineage involved in recombination; Column 5: Region of the  
 783 first Breakpoint in the genome; Column 6: Region of the second Breakpoint in the genome; Column  
 784 7: Minimum length of the recombinant segments; Column 8: Dunn-Sidak correction of p, in mantissa-  
 785 exponent format

786

787

| Amino acid Position | Wuhan Reference Residue | Recombinant Conserved Residue | Relative Conservation Score | Significance                                                                                                                                                                                                                                                                                                                                                             | Reference | XD | XE | XF | XG | XH | XJ | XK | XL | XM | XN | XP | XQ | XR | XS | XT | XU | XV | XW | XY | XZ | XAA | XAB | XAC | XAD | XAE | XAF | XAG | XAH |   |
|---------------------|-------------------------|-------------------------------|-----------------------------|--------------------------------------------------------------------------------------------------------------------------------------------------------------------------------------------------------------------------------------------------------------------------------------------------------------------------------------------------------------------------|-----------|----|----|----|----|----|----|----|----|----|----|----|----|----|----|----|----|----|----|----|----|-----|-----|-----|-----|-----|-----|-----|-----|---|
| 19                  | T                       | I                             | 1.18                        | T19I: Significant evasion from NTD-targeted neutralizing antibodies (nAbs)                                                                                                                                                                                                                                                                                               | (34)      | R  | I  | T  | I  | I  | I  | I  | I  | I  | I  | T  | I  | I  | T  | I  | I  | I  | I  | I  | I  | I   | I   | I   | I   | I   | I   | I   | I   |   |
| 24                  | L                       | -                             | 1.18                        | del24-26+A27S: Loss in neutralization activity of NTD-directed monoclonal antibodies (mAbs)                                                                                                                                                                                                                                                                              | (34)      | L  | -  | L  | -  | -  | -  | -  | -  | -  | -  | L  | -  | -  | L  | -  | -  | -  | -  | -  | -  | -   | -   | -   | -   | -   | -   | -   |     |   |
| 25                  | P                       | -                             | 1.18                        | del25-27 : Significant evasion from NTD-targeted neutralizing antibodies; del24-26+A27S: Loss in neutralization activity of NTD-directed monoclonal antibodies                                                                                                                                                                                                           | (33, 34)  | P  | -  | P  | -  | -  | -  | -  | -  | -  | -  | P  | -  | -  | P  | -  | -  | -  | -  | -  | -  | -   | -   | -   | -   | -   | -   | -   |     |   |
| 26                  | P                       | -                             | 1.18                        | del25-27 : Significant evasion from NTD-targeted neutralizing antibodies (nAbs); del24-26+A27S - Loss in neutralization activity of NTD-directed monoclonal antibodies                                                                                                                                                                                                   | (33, 34)  | P  | -  | P  | -  | -  | -  | -  | -  | -  | -  | P  | -  | -  | P  | -  | -  | -  | -  | -  | -  | -   | -   | -   | -   | -   | -   | -   |     |   |
| 27                  | A                       | S                             | 1.23                        | A27S: Reduce spike sensitivity to neutralization by sera from BNT/BNT vaccinated individuals; del24-26+A27S: Loss in neutralization activity of NTD-directed monoclonal antibodies                                                                                                                                                                                       | (34, 35)  | S  | S  | A  | S  | S  | S  | S  | S  | S  | S  | A  | S  | S  | A  | S  | S  | S  | S  | S  | S  | S   | S   | S   | S   | S   | S   | S   |     |   |
| 213                 | V                       | G                             | 1.13                        | V213G: Reduce spike sensitivity to neutralization by sera from BNT/BNT vaccinated individuals                                                                                                                                                                                                                                                                            | (35)      | P  | G  | P  | G  | G  | V  | G  | G  | G  | G  | P  | G  | G  | P  | G  | G  | G  | G  | G  | G  | G   | G   | G   | G   | G   | G   | G   |     |   |
| 371                 | S                       | F                             | 1.13                        | S317F: Induce large-scale escapes of broad sarbecovirus neutralizing antibodies; Reduce spike sensitivity to neutralization by BNT/BNT sera in the range of 2 to 5 fold                                                                                                                                                                                                  | (7, 35)   | L  | F  | L  | F  | F  | F  | F  | F  | F  | F  | L  | F  | F  | L  | F  | F  | F  | F  | F  | F  | F   | F   | F   | F   | F   | F   | S   | F   |   |
| 376                 | T                       | A                             | 1.18                        | T376 mutation helps ACE2 competing antibodies escape                                                                                                                                                                                                                                                                                                                     | (7)       | T  | A  | T  | A  | A  | A  | A  | A  | A  | A  | T  | A  | A  | T  | A  | A  | A  | A  | A  | A  | A   | A   | A   | A   | A   | A   | A   | A   |   |
| 405                 | D                       | N                             | 1.17                        | D405N: Significant escape of BA.1 lineage omicron-specific neutralizing antibodies; induce large-scale escapes of broad sarbecovirus neutralizing antibodies; D405 mutation helps ACE2 competing antibodies escape; Alters the antigenic surface that disrupts the binding of antibodies; The main reason for poor crossreactivity among BA.2/BA.3/BA.4/BA.5 sublineage. | (7)       | D  | N  | D  | N  | N  | N  | N  | N  | N  | N  | D  | N  | N  | D  | N  | N  | N  | N  | N  | N  | N   | N   | N   | N   | N   | N   | N   | N   | N |
| 408                 | R                       | S                             | 1.2                         | R408S: Induce large-scale escapes of broad sarbecovirus neutralizing antibodies R408 mutation helps ACE2 competing antibodies escape ; Alters the antigenic surface that disrupts the binding of antibodies;                                                                                                                                                             | (7)       | R  | S  | R  | S  | S  | S  | S  | S  | S  | S  | R  | S  | S  | R  | S  | S  | S  | S  | S  | S  | S   | S   | S   | S   | S   | S   | S   | S   |   |
| 493                 | Q                       | R                             | 1.23                        | Q493R: Emerges during bamlanivimab/etesevimab cocktail treatment ; Causes resistance to bamlanivimab and etesevimab ; Q493 is critical for binding to Class 2 and 3 antibodies ; Q493 mutations increase binding affinity to the ACE2                                                                                                                                    | (36)      | R  | R  | R  | R  | R  | R  | R  | R  | R  | R  | R  | R  | R  | R  | R  | R  | R  | R  | R  | R  | R   | R   | R   | R   | R   | R   | R   | R   |   |

788

789 **Supplementary Table 2: At least one omicron parenting Recombinant lineage spike**  
 790 **residue conservation relative to omicron with discovered relevance in viral transmission**  
 791 **and immune escape having recombinant specific residue information.** Each conserved  
 792 amino acid position in spike which is varying from Wuhan reference sequence wuhan  
 793 reference spike residue at those positions in one letter code, conserved recombinant lineages  
 794 residue at that position in one letter code, relative residue conservation score of recombinant

795 lineages spike relative to residue conservation scores in spikes of omicron lineages, mutation  
796 significance, reference for the mutation significance information and specific amino acid  
797 residue in each of the 28 at least one omicron parenting recombinants in these conserved  
798 positions are tabulated.

799

## 800 REFERENCES

- 801 1. Duffy S. Why are RNA virus mutation rates so damn high? *PLoS Biol.* 2018;16(8):e3000003.
- 802 2. Warren CJ, Sawyer SL. How host genetics dictates successful viral zoonosis. *PLoS Biol.*  
803 2019;17(4):e3000217.
- 804 3. Harvey WT, Carabelli AM, Jackson B, Gupta RK, Thomson EC, Harrison EM, et al. SARS-CoV-2  
805 variants, spike mutations and immune escape. *Nat Rev Microbiol.* 2021;19(7):409-24.
- 806 4. Elena SF, Sanjuan R. Adaptive value of high mutation rates of RNA viruses: separating causes  
807 from consequences. *J Virol.* 2005;79(18):11555-8.
- 808 5. Hadfield J, Megill C, Bell SM, Huddleston J, Potter B, Callender C, et al. Nextstrain: real-time  
809 tracking of pathogen evolution. *Bioinformatics.* 2018;34(23):4121-3.
- 810 6. Wang Q, Guo Y, Iketani S, Nair MS, Li Z, Mohri H, et al. Antibody evasion by SARS-CoV-2  
811 Omicron subvariants BA.2.12.1, BA.4 and BA.5. *Nature.* 2022;608(7923):603-8.
- 812 7. Cao Y, Yisimayi A, Jian F, Song W, Xiao T, Wang L, et al. BA.2.12.1, BA.4 and BA.5 escape  
813 antibodies elicited by Omicron infection. *Nature.* 2022;608(7923):593-602.
- 814 8. Liu L, Iketani S, Guo Y, Chan JF, Wang M, Liu L, et al. Striking antibody evasion manifested by  
815 the Omicron variant of SARS-CoV-2. *Nature.* 2022;602(7898):676-81.
- 816 9. Wang P, Nair MS, Liu L, Iketani S, Luo Y, Guo Y, et al. Antibody resistance of SARS-CoV-2  
817 variants B.1.351 and B.1.1.7. *Nature.* 2021;593(7857):130-5.
- 818 10. Mlcochova P, Kemp SA, Dhar MS, Papa G, Meng B, Ferreira I, et al. SARS-CoV-2 B.1.617.2  
819 Delta variant replication and immune evasion. *Nature.* 2021;599(7883):114-9.
- 820 11. Iketani S, Liu L, Guo Y, Liu L, Chan JF, Huang Y, et al. Antibody evasion properties of SARS-  
821 CoV-2 Omicron sublineages. *Nature.* 2022;604(7906):553-6.
- 822 12. Zhang L, Jackson CB, Mou H, Ojha A, Peng H, Quinlan BD, et al. SARS-CoV-2 spike-protein  
823 D614G mutation increases virion spike density and infectivity. *Nat Commun.* 2020;11(1):6013.
- 824 13. Vijaykrishna D, Mukerji R, Smith GJ. RNA Virus Reassortment: An Evolutionary Mechanism  
825 for Host Jumps and Immune Evasion. *PLoS Pathog.* 2015;11(7):e1004902.
- 826 14. Gonzalez-Candelas F, Lopez-Labrador FX, Bracho MA. Recombination in hepatitis C virus.  
827 *Viruses.* 2011;3(10):2006-24.
- 828 15. Gutierrez B, Castelan Sanchez HG, Candido DDS, Jackson B, Fleishon S, Houzet R, et al.  
829 Emergence and widespread circulation of a recombinant SARS-CoV-2 lineage in North America. *Cell*  
830 *Host Microbe.* 2022;30(8):1112-23 e3.
- 831 16. Smith GJ, Bahl J, Vijaykrishna D, Zhang J, Poon LL, Chen H, et al. Dating the emergence of  
832 pandemic influenza viruses. *Proc Natl Acad Sci U S A.* 2009;106(28):11709-12.
- 833 17. Dahourou G, Guillot S, Le Gall O, Crainic R. Genetic recombination in wild-type poliovirus. *J*  
834 *Gen Virol.* 2002;83(Pt 12):3103-10.
- 835 18. Burke DS. Recombination in HIV: an important viral evolutionary strategy. *Emerg Infect Dis.*  
836 1997;3(3):253-9.
- 837 19. Wang H, Cui X, Cai X, An T. Recombination in Positive-Strand RNA Viruses. *Front Microbiol.*  
838 2022;13:870759.
- 839 20. Jackson B, Boni MF, Bull MJ, Colleran A, Colquhoun RM, Darby AC, et al. Generation and  
840 transmission of interlineage recombinants in the SARS-CoV-2 pandemic. *Cell.* 2021;184(20):5179-88  
841 e8.
- 842 21. Cui J, Li F, Shi ZL. Origin and evolution of pathogenic coronaviruses. *Nat Rev Microbiol.*  
843 2019;17(3):181-92.

- 844 22. Li X, Giorgi EE, Marichannegowda MH, Foley B, Xiao C, Kong XP, et al. Emergence of SARS-  
845 CoV-2 through recombination and strong purifying selection. *Sci Adv.* 2020;6(27).
- 846 23. Sekizuka T, Itokawa K, Saito M, Shimatani M, Matsuyama S, Hasegawa H, et al. Genome  
847 Recombination between the Delta and Alpha Variants of Severe Acute Respiratory Syndrome  
848 Coronavirus 2 (SARS-CoV-2). *Jpn J Infect Dis.* 2022;75(4):415-8.
- 849 24. Pollett S, Conte MA, Sanborn M, Jarman RG, Lidl GM, Modjarrad K, et al. A comparative  
850 recombination analysis of human coronaviruses and implications for the SARS-CoV-2 pandemic. *Sci*  
851 *Rep.* 2021;11(1):17365.
- 852 25. VanInsberghe D, Neish AS, Lowen AC, Koelle K. Recombinant SARS-CoV-2 genomes  
853 circulated at low levels over the first year of the pandemic. *Virus Evolution.* 2021;7(2).
- 854 26. Khare S, Gurry C, Freitas L, Schultz MB, Bach G, Diallo A, et al. GISAID's Role in Pandemic  
855 Response. *China CDC Wkly.* 2021;3(49):1049-51.
- 856 27. Hatcher EL, Zhdanov SA, Bao Y, Blinkova O, Nawrocki EP, Ostapchuck Y, et al. Virus Variation  
857 Resource - improved response to emergent viral outbreaks. *Nucleic Acids Res.* 2017;45(D1):D482-  
858 D90.
- 859 28. Furuse Y. Genomic sequencing effort for SARS-CoV-2 by country during the pandemic. *Int J*  
860 *Infect Dis.* 2021;103:305-7.
- 861 29. Boni MF, Lemey P, Jiang X, Lam TT, Perry BW, Castoe TA, et al. Evolutionary origins of the  
862 SARS-CoV-2 sarbecovirus lineage responsible for the COVID-19 pandemic. *Nat Microbiol.*  
863 2020;5(11):1408-17.
- 864 30. DeRonde S, Deuling H, Parker J, Chen J. Identification of a novel SARS-CoV-2 variant with a  
865 truncated protein in ORF8 gene by next generation sequencing. *Sci Rep.* 2022;12(1):4631.
- 866 31. Gribble J, Stevens LJ, Agostini ML, Anderson-Daniels J, Chappell JD, Lu X, et al. The  
867 coronavirus proofreading exoribonuclease mediates extensive viral recombination. *PLoS Pathog.*  
868 2021;17(1):e1009226.
- 869 32. Ahmad J, Ikram S, Ahmad F, Rehman IU, Mushtaq M. SARS-CoV-2 RNA Dependent RNA  
870 polymerase (RdRp) - A drug repurposing study. *Heliyon.* 2020;6(7):e04502.
- 871 33. Xia S, Wang L, Zhu Y, Lu L, Jiang S. Origin, virological features, immune evasion and  
872 intervention of SARS-CoV-2 Omicron sublineages. *Signal Transduct Target Ther.* 2022;7(1):241.
- 873 34. Ai J, Wang X, He X, Zhao X, Zhang Y, Jiang Y, et al. Antibody evasion of SARS-CoV-2 Omicron  
874 BA.1, BA.1.1, BA.2, and BA.3 sub-lineages. *Cell Host Microbe.* 2022;30(8):1077-83 e4.
- 875 35. Pastorio C, Zech F, Noettger S, Jung C, Jacob T, Sanderson T, et al. Determinants of Spike  
876 infectivity, processing, and neutralization in SARS-CoV-2 Omicron subvariants BA.1 and BA.2. *Cell*  
877 *Host Microbe.* 2022.
- 878 36. Focosi D, Novazzi F, Genoni A, Dentali F, Gasperina DD, Baj A, et al. Emergence of SARS-COV-  
879 2 Spike Protein Escape Mutation Q493R after Treatment for COVID-19. *Emerg Infect Dis.*  
880 2021;27(10):2728-31.
- 881 37. Simon-Loriere E, Holmes EC. Why do RNA viruses recombine? *Nat Rev Microbiol.*  
882 2011;9(8):617-26.
- 883 38. Raghwani J, Thomas XV, Koekkoek SM, Schinkel J, Molenkamp R, van de Laar TJ, et al. Origin  
884 and evolution of the unique hepatitis C virus circulating recombinant form 2k/1b. *J Virol.*  
885 2012;86(4):2212-20.
- 886 39. Glaesser D, Kester J, Paulose H, Alizadeh A, Valentin B. Global travel patterns: an overview. *J*  
887 *Travel Med.* 2017;24(4).
- 888 40. Mallapaty S. Where did Omicron come from? Three key theories. *Nature.*  
889 2022;602(7895):26-8.
- 890 41. Peacock TP, Goldhill DH, Zhou J, Baillon L, Frise R, Swann OC, et al. The furin cleavage site in  
891 the SARS-CoV-2 spike protein is required for transmission in ferrets. *Nat Microbiol.* 2021;6(7):899-  
892 909.
- 893 42. Li Q, Wu J, Nie J, Zhang L, Hao H, Liu S, et al. The Impact of Mutations in SARS-CoV-2 Spike on  
894 Viral Infectivity and Antigenicity. *Cell.* 2020;182(5):1284-94 e9.

- 895 43. Long QX, Liu BZ, Deng HJ, Wu GC, Deng K, Chen YK, et al. Antibody responses to SARS-CoV-2  
896 in patients with COVID-19. *Nat Med.* 2020;26(6):845-8.
- 897 44. Chi X, Yan R, Zhang J, Zhang G, Zhang Y, Hao M, et al. A neutralizing human antibody binds to  
898 the N-terminal domain of the Spike protein of SARS-CoV-2. *Science.* 2020;369(6504):650-5.
- 899 45. Elshabrawy HA, Coughlin MM, Baker SC, Prabhakar BS. Human monoclonal antibodies  
900 against highly conserved HR1 and HR2 domains of the SARS-CoV spike protein are more broadly  
901 neutralizing. *PLoS One.* 2012;7(11):e50366.
- 902 46. Kumar R, Murugan NA, Srivastava V. Improved Binding Affinity of Omicron's Spike Protein for  
903 the Human Angiotensin-Converting Enzyme 2 Receptor Is the Key behind Its Increased Virulence. *Int*  
904 *J Mol Sci.* 2022;23(6).
- 905 47. Grifoni A, Sidney J, Vita R, Peters B, Crotty S, Weiskopf D, et al. SARS-CoV-2 human T cell  
906 epitopes: Adaptive immune response against COVID-19. *Cell Host Microbe.* 2021;29(7):1076-92.
- 907 48. Brito AF, Semenova E, Dudas G, Hassler GW, Kalinich CC, Kraemer MUG, et al. Global  
908 disparities in SARS-CoV-2 genomic surveillance. *medRxiv.* 2021.
- 909 49. Zhao J, Qiu J, Aryal S, Hackett JL, Wang J. The RNA Architecture of the SARS-CoV-2 3'-  
910 Untranslated Region. *Viruses.* 2020;12(12).
- 911 50. Oude Munnink BB, Sikkema RS, Nieuwenhuijse DF, Molenaar RJ, Munger E, Molenkamp R, et  
912 al. Transmission of SARS-CoV-2 on mink farms between humans and mink and back to humans.  
913 *Science.* 2021;371(6525):172-7.
- 914 51. Tan CCS, Lam SD, Richard D, Owen CJ, Berchtold D, Orengo C, et al. Transmission of SARS-  
915 CoV-2 from humans to animals and potential host adaptation. *Nat Commun.* 2022;13(1):2988.
- 916 52. Sayers EW, Bolton EE, Brister JR, Canese K, Chan J, Comeau DC, et al. Database resources of  
917 the national center for biotechnology information. *Nucleic Acids Res.* 2022;50(D1):D20-D6.
- 918 53. Walls AC, Park YJ, Tortorici MA, Wall A, McGuire AT, Veesler D. Structure, Function, and  
919 Antigenicity of the SARS-CoV-2 Spike Glycoprotein. *Cell.* 2020;181(2):281-92 e6.
- 920 54. Liu C, Shi W, Becker ST, Schatz DG, Liu B, Yang Y. Structural basis of mismatch recognition by  
921 a SARS-CoV-2 proofreading enzyme. *Science.* 2021;373(6559):1142-6.
- 922 55. Berman HM, Westbrook J, Feng Z, Gilliland G, Bhat TN, Weissig H, et al. The Protein Data  
923 Bank. *Nucleic Acids Res.* 2000;28(1):235-42.
- 924 56. Rambaut A, Holmes EC, O'Toole A, Hill V, McCrone JT, Ruis C, et al. A dynamic nomenclature  
925 proposal for SARS-CoV-2 lineages to assist genomic epidemiology. *Nat Microbiol.* 2020;5(11):1403-7.
- 926 57. O'Toole A, Scher E, Underwood A, Jackson B, Hill V, McCrone JT, et al. Assignment of  
927 epidemiological lineages in an emerging pandemic using the pangolin tool. *Virus Evol.*  
928 2021;7(2):veab064.
- 929 58. Aksamentov I, Roemer C, Hodcroft E, Neher R. Nextclade: clade assignment, mutation calling  
930 and quality control for viral genomes. *Journal of Open Source Software.* 2021;6(67).
- 931 59. Nguyen LT, Schmidt HA, von Haeseler A, Minh BQ. IQ-TREE: a fast and effective stochastic  
932 algorithm for estimating maximum-likelihood phylogenies. *Mol Biol Evol.* 2015;32(1):268-74.
- 933 60. Hoang DT, Chernomor O, von Haeseler A, Minh BQ, Vinh LS. UFBoot2: Improving the  
934 Ultrafast Bootstrap Approximation. *Mol Biol Evol.* 2018;35(2):518-22.
- 935 61. Katoh K, Standley DM. MAFFT multiple sequence alignment software version 7:  
936 improvements in performance and usability. *Mol Biol Evol.* 2013;30(4):772-80.
- 937 62. Lam HM, Ratmann O, Boni MF. Improved Algorithmic Complexity for the 3SEQ  
938 Recombination Detection Algorithm. *Mol Biol Evol.* 2018;35(1):247-51.
- 939 63. Martin DP, Varsani A, Roumagnac P, Botha G, Maslamoney S, Schwab T, et al. RDP5: a  
940 computer program for analyzing recombination in, and removing signals of recombination from,  
941 nucleotide sequence datasets. *Virus Evol.* 2021;7(1):veaa087.
- 942 64. Capella-Gutierrez S, Silla-Martinez JM, Gabaldon T. trimAl: a tool for automated alignment  
943 trimming in large-scale phylogenetic analyses. *Bioinformatics.* 2009;25(15):1972-3.
- 944 65. Camacho C, Coulouris G, Avagyan V, Ma N, Papadopoulos J, Bealer K, et al. BLAST+:  
945 architecture and applications. *BMC Bioinformatics.* 2009;10:421.



- 946 66. Madeira F, Park YM, Lee J, Buso N, Gur T, Madhusoodanan N, et al. The EMBL-EBI search and  
947 sequence analysis tools APIs in 2019. *Nucleic Acids Res.* 2019;47(W1):W636-W41.
- 948 67. Quinlan AR, Hall IM. BEDTools: a flexible suite of utilities for comparing genomic features.  
949 *Bioinformatics.* 2010;26(6):841-2.
- 950 68. Grant BJ, Skjaerven L, Yao XQ. The Bio3D packages for structural bioinformatics. *Protein Sci.*  
951 2021;30(1):20-30.
- 952 69. Pettersen EF, Goddard TD, Huang CC, Meng EC, Couch GS, Croll TI, et al. UCSF ChimeraX:  
953 Structure visualization for researchers, educators, and developers. *Protein Sci.* 2021;30(1):70-82.
- 954 70. Yu G. Using ggtree to Visualize Data on Tree-Like Structures. *Curr Protoc Bioinformatics.*  
955 2020;69(1):e96.
- 956 71. Wang LG, Lam TT, Xu S, Dai Z, Zhou L, Feng T, et al. Treeio: An R Package for Phylogenetic  
957 Tree Input and Output with Richly Annotated and Associated Data. *Mol Biol Evol.* 2020;37(2):599-  
958 603.
- 959 72. Wickham H, Averick M, Bryan J, Chang W, McGowan L, François R, et al. Welcome to the  
960 Tidyverse. *Journal of Open Source Software.* 2019;4(43).
- 961

**A**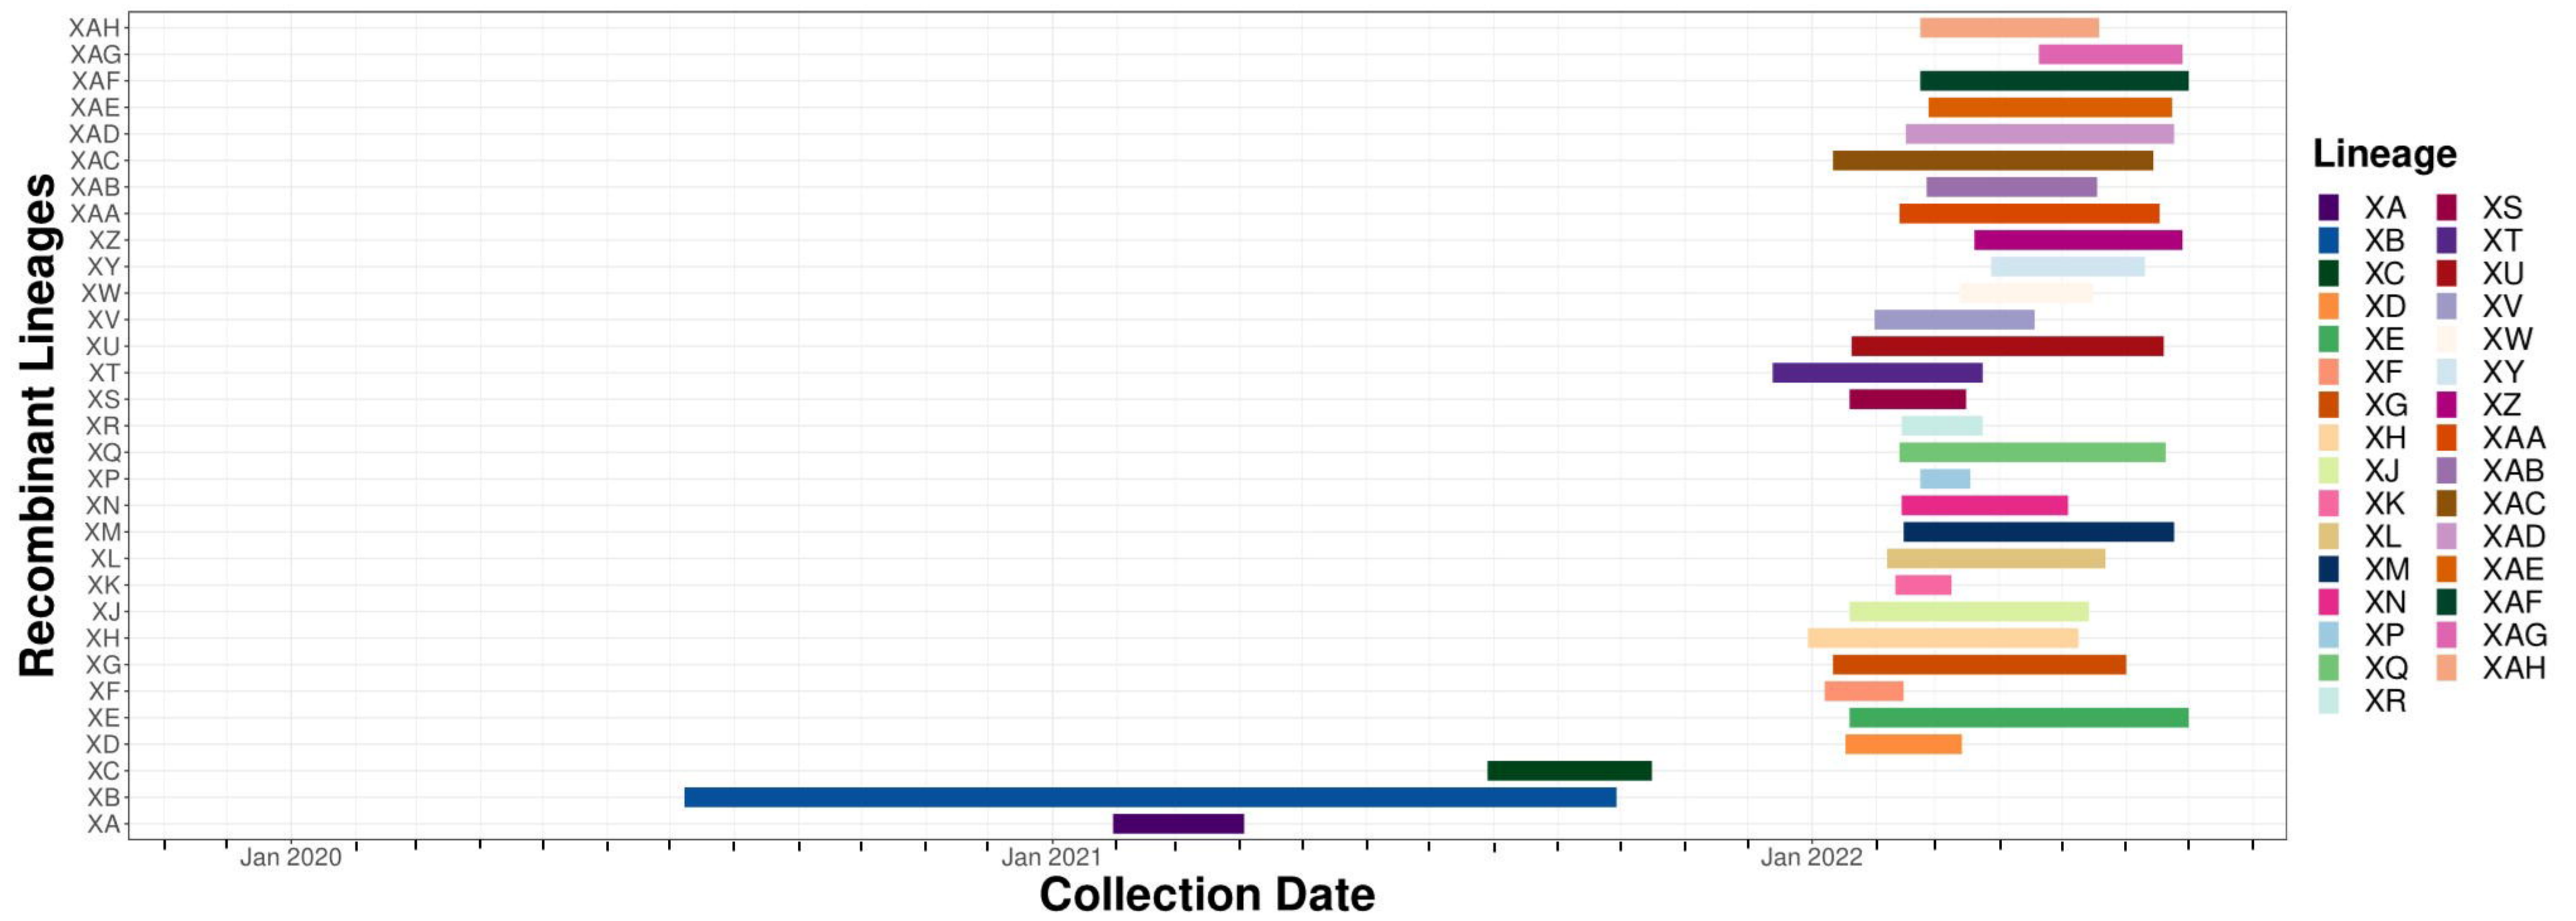**B**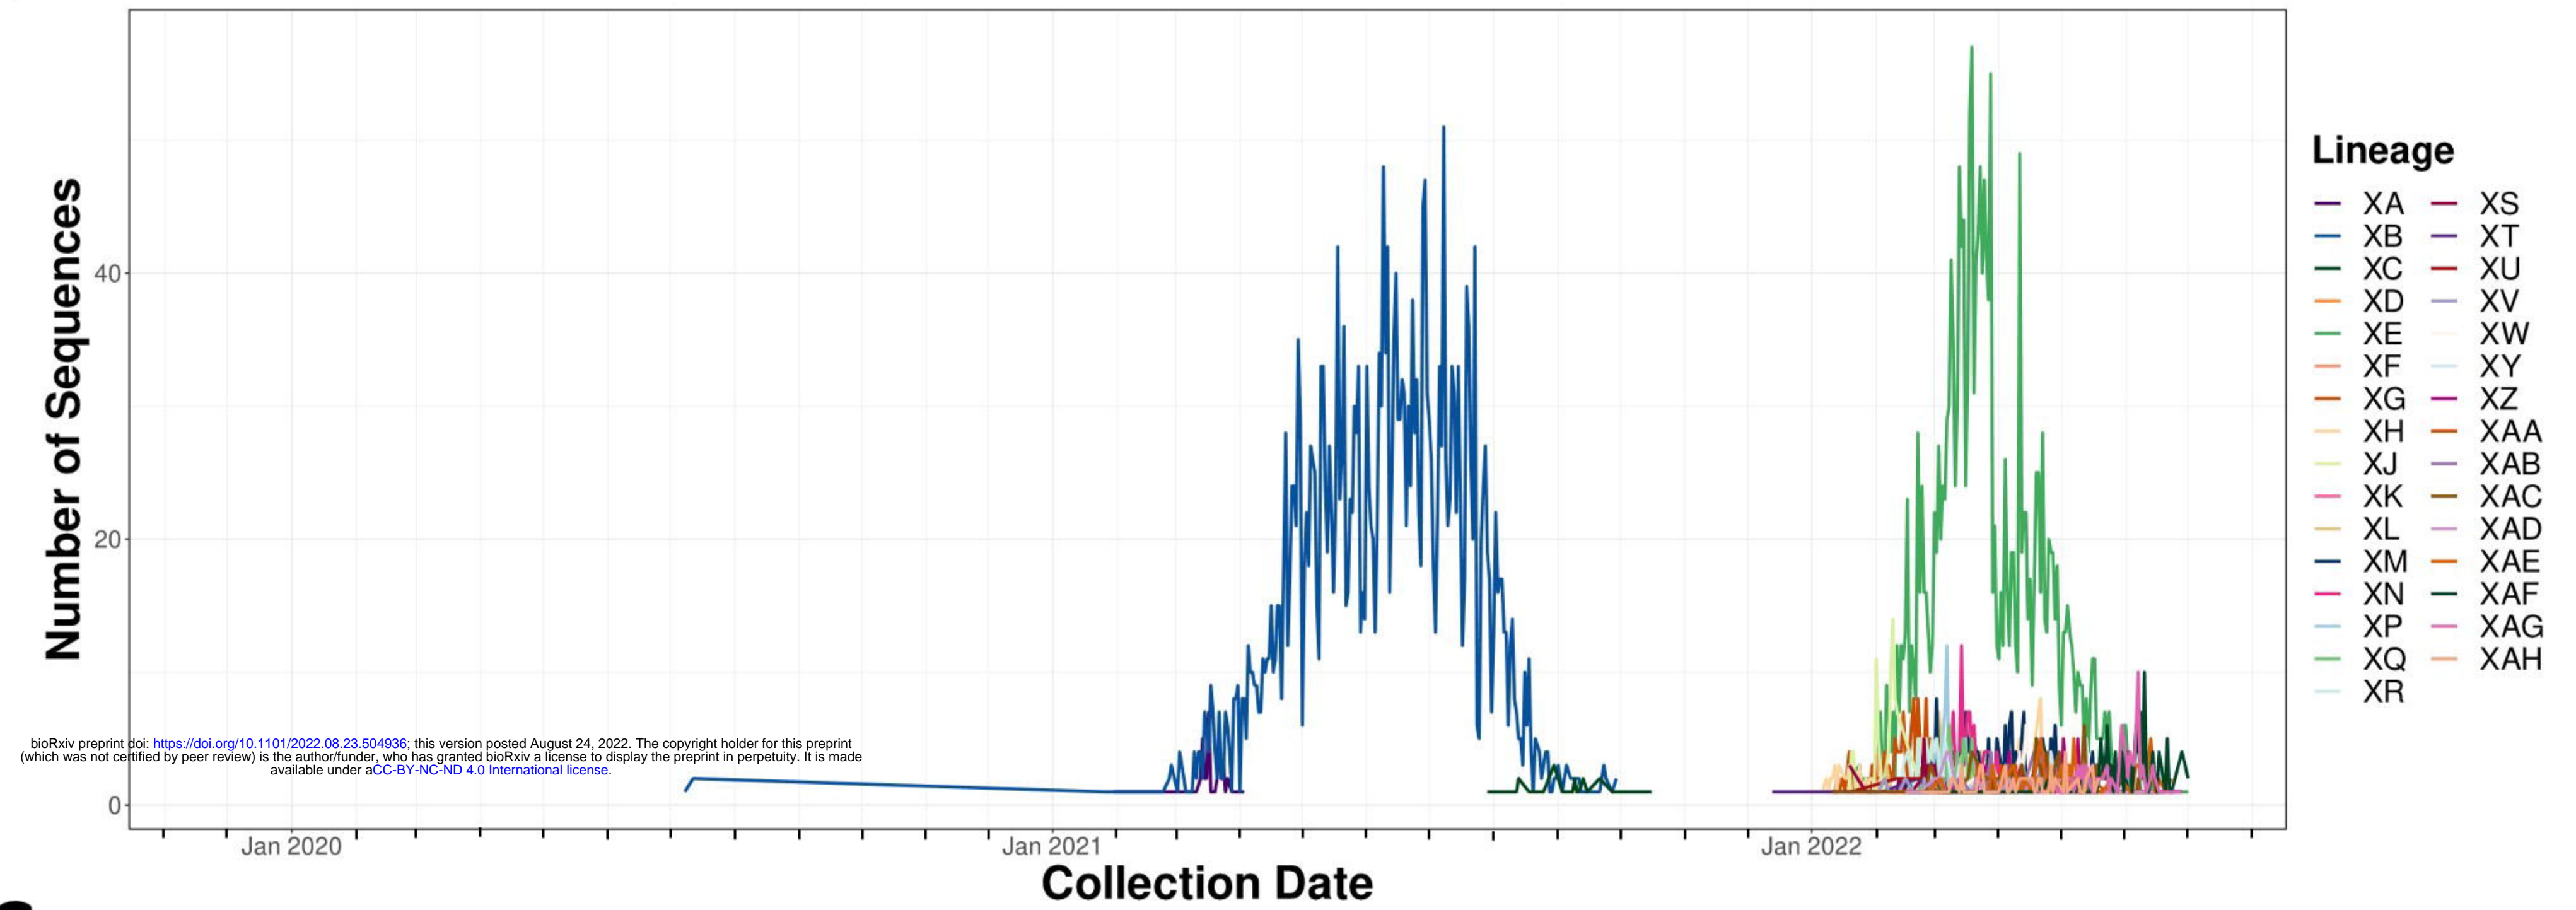**C**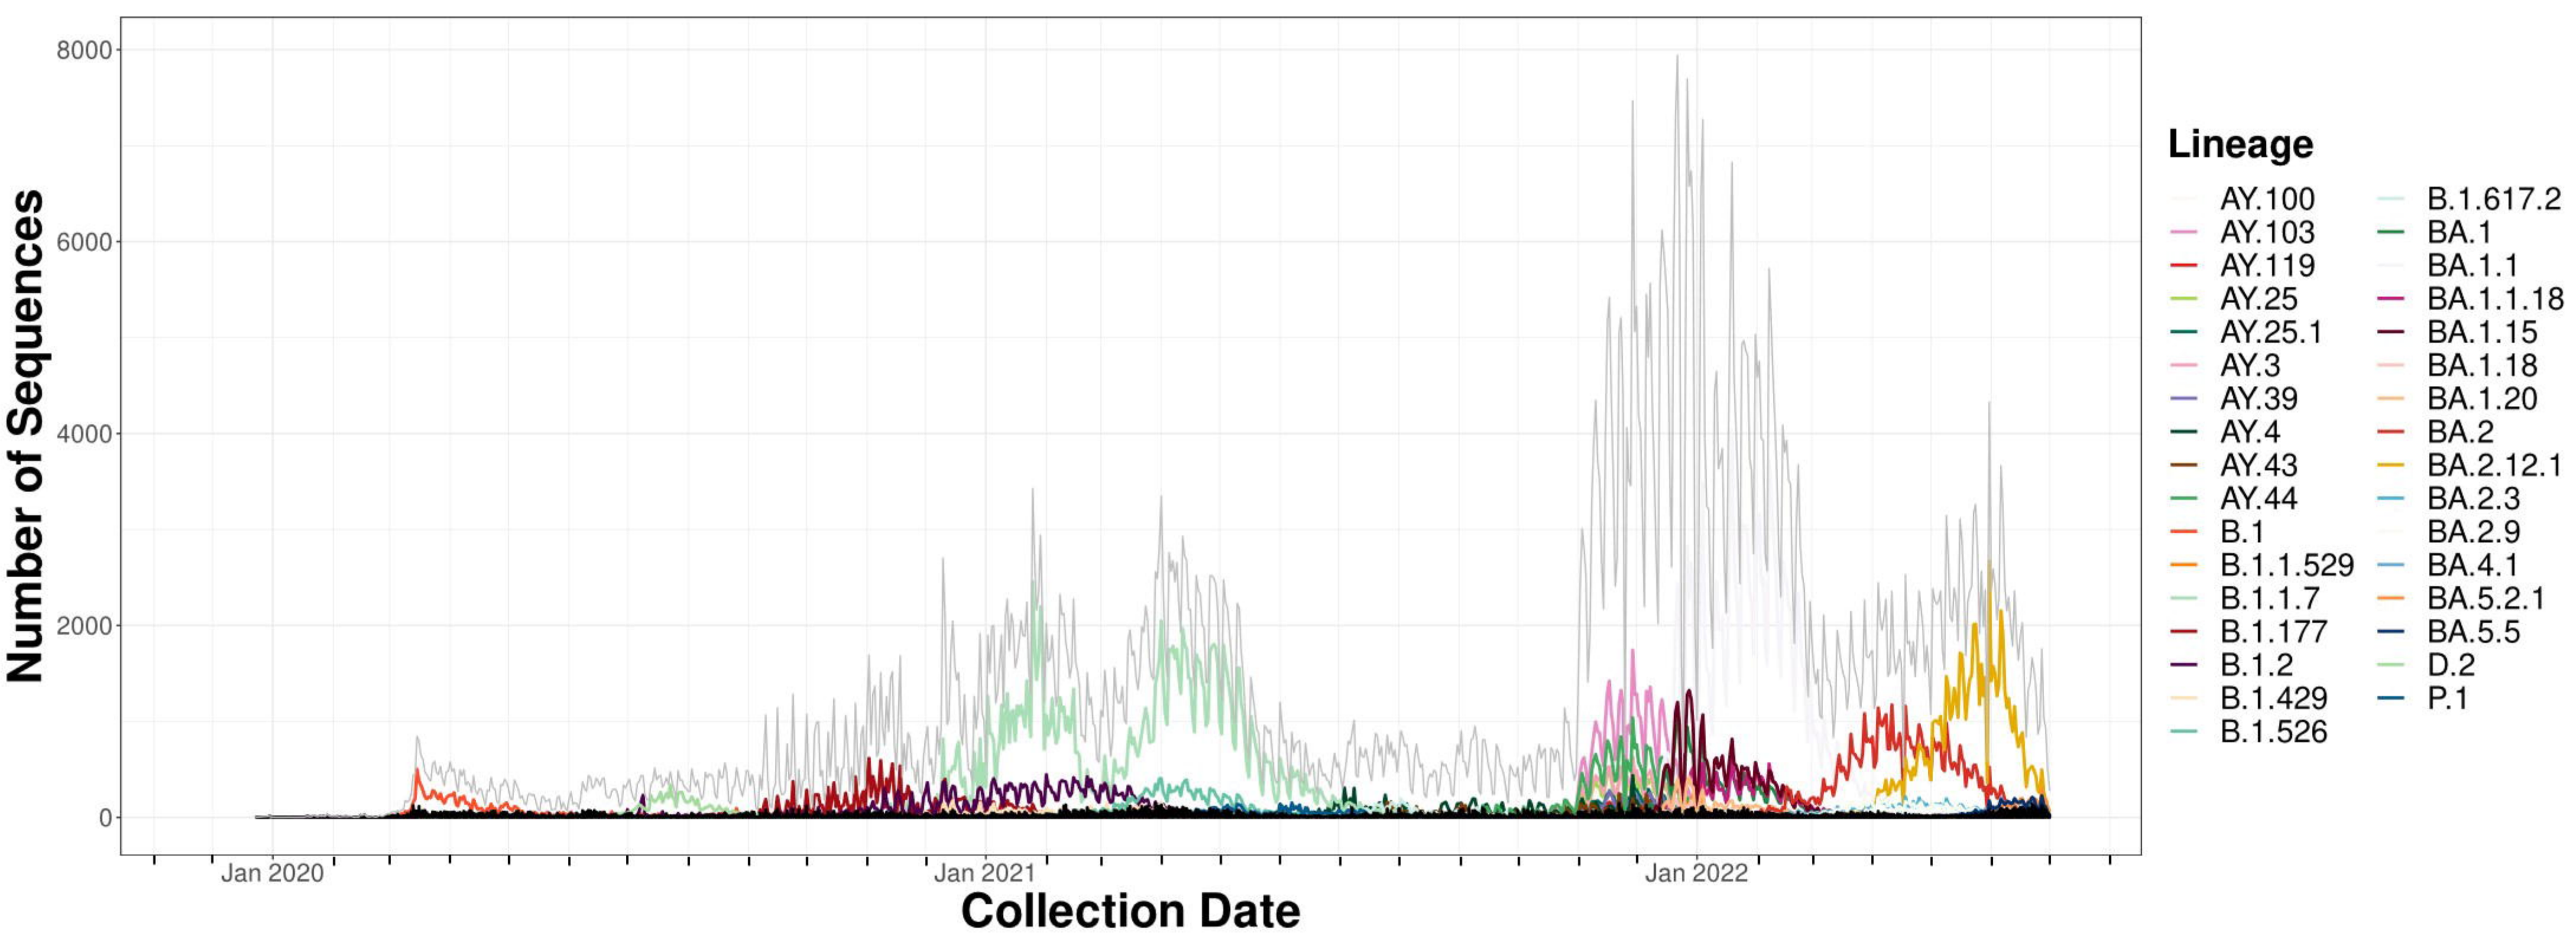

**A**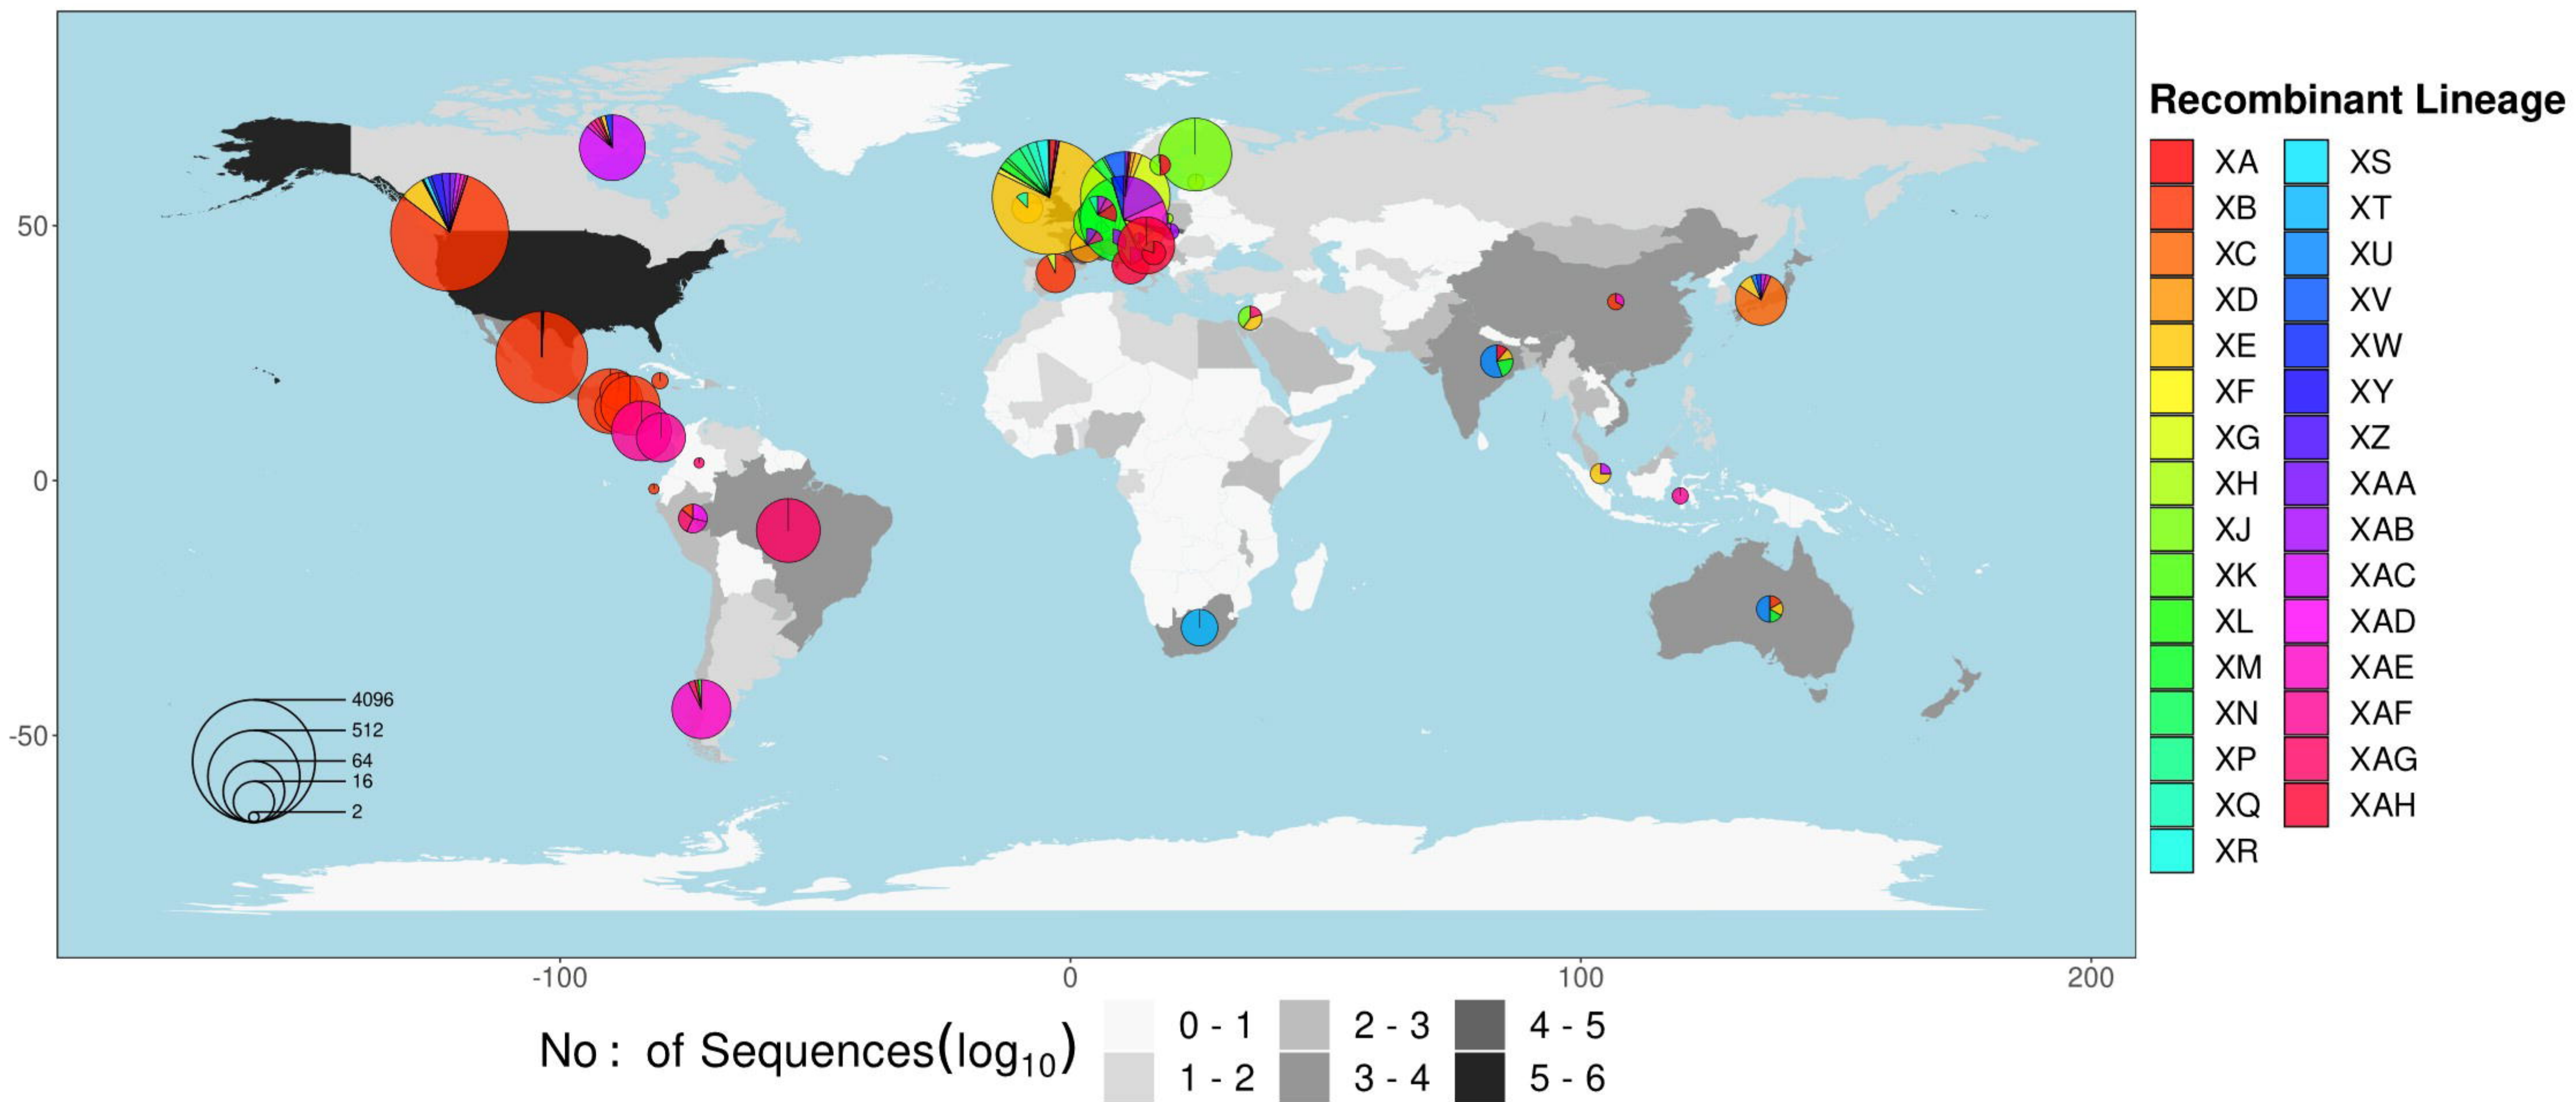**B**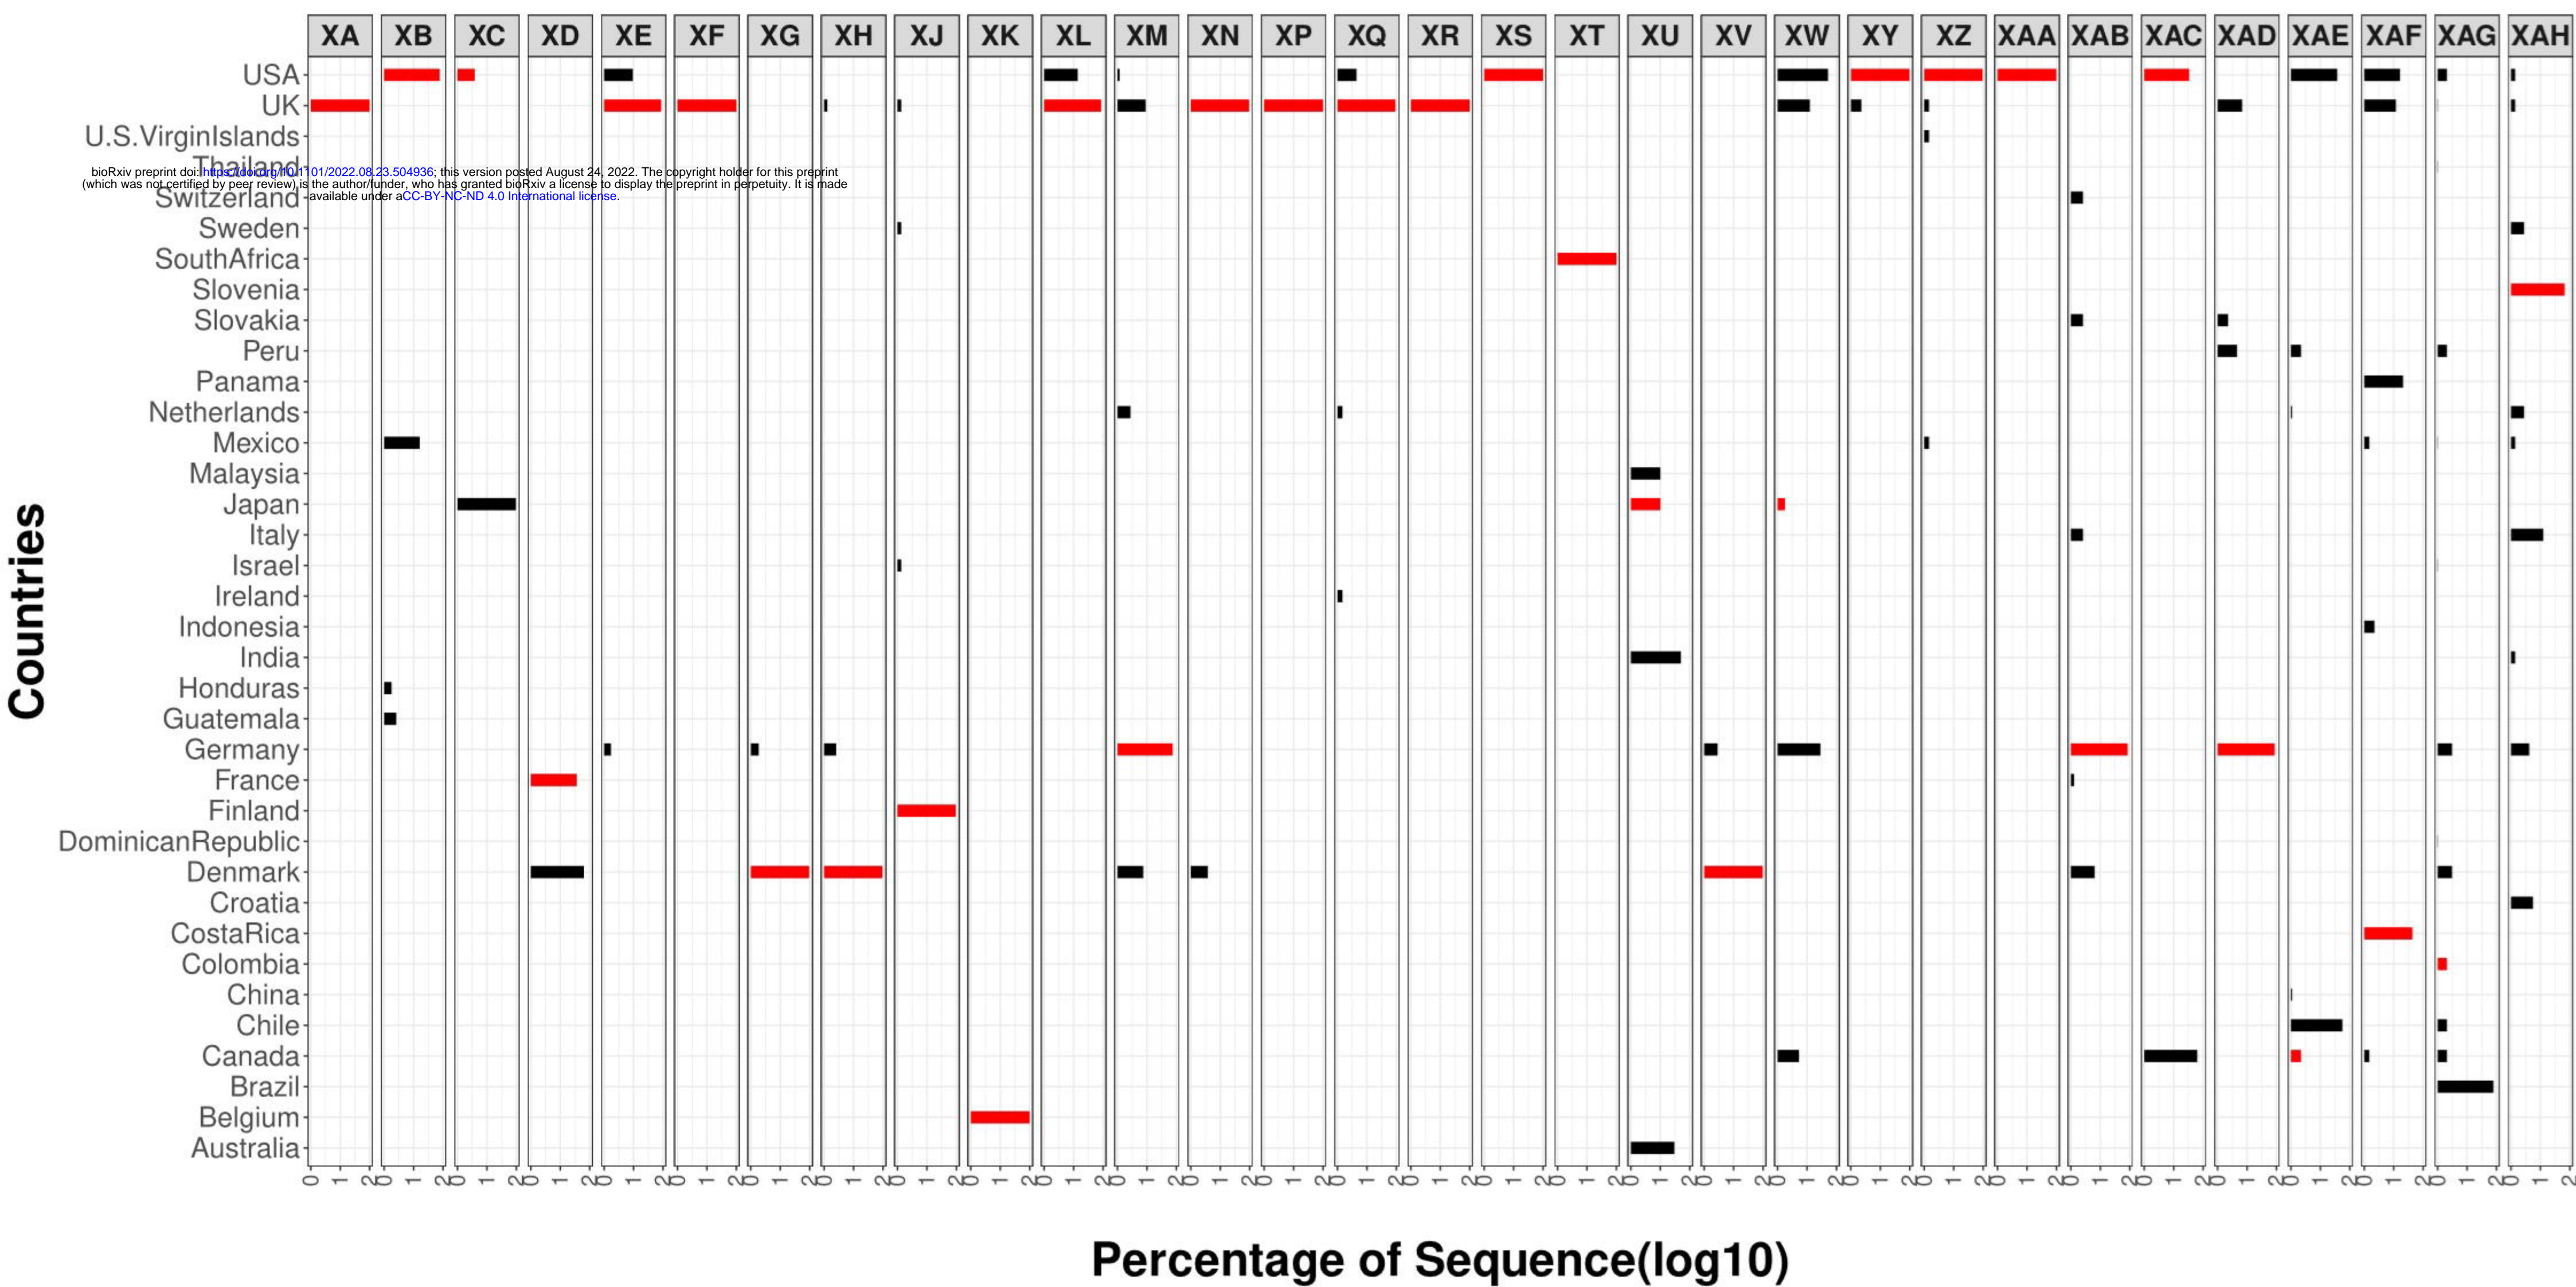

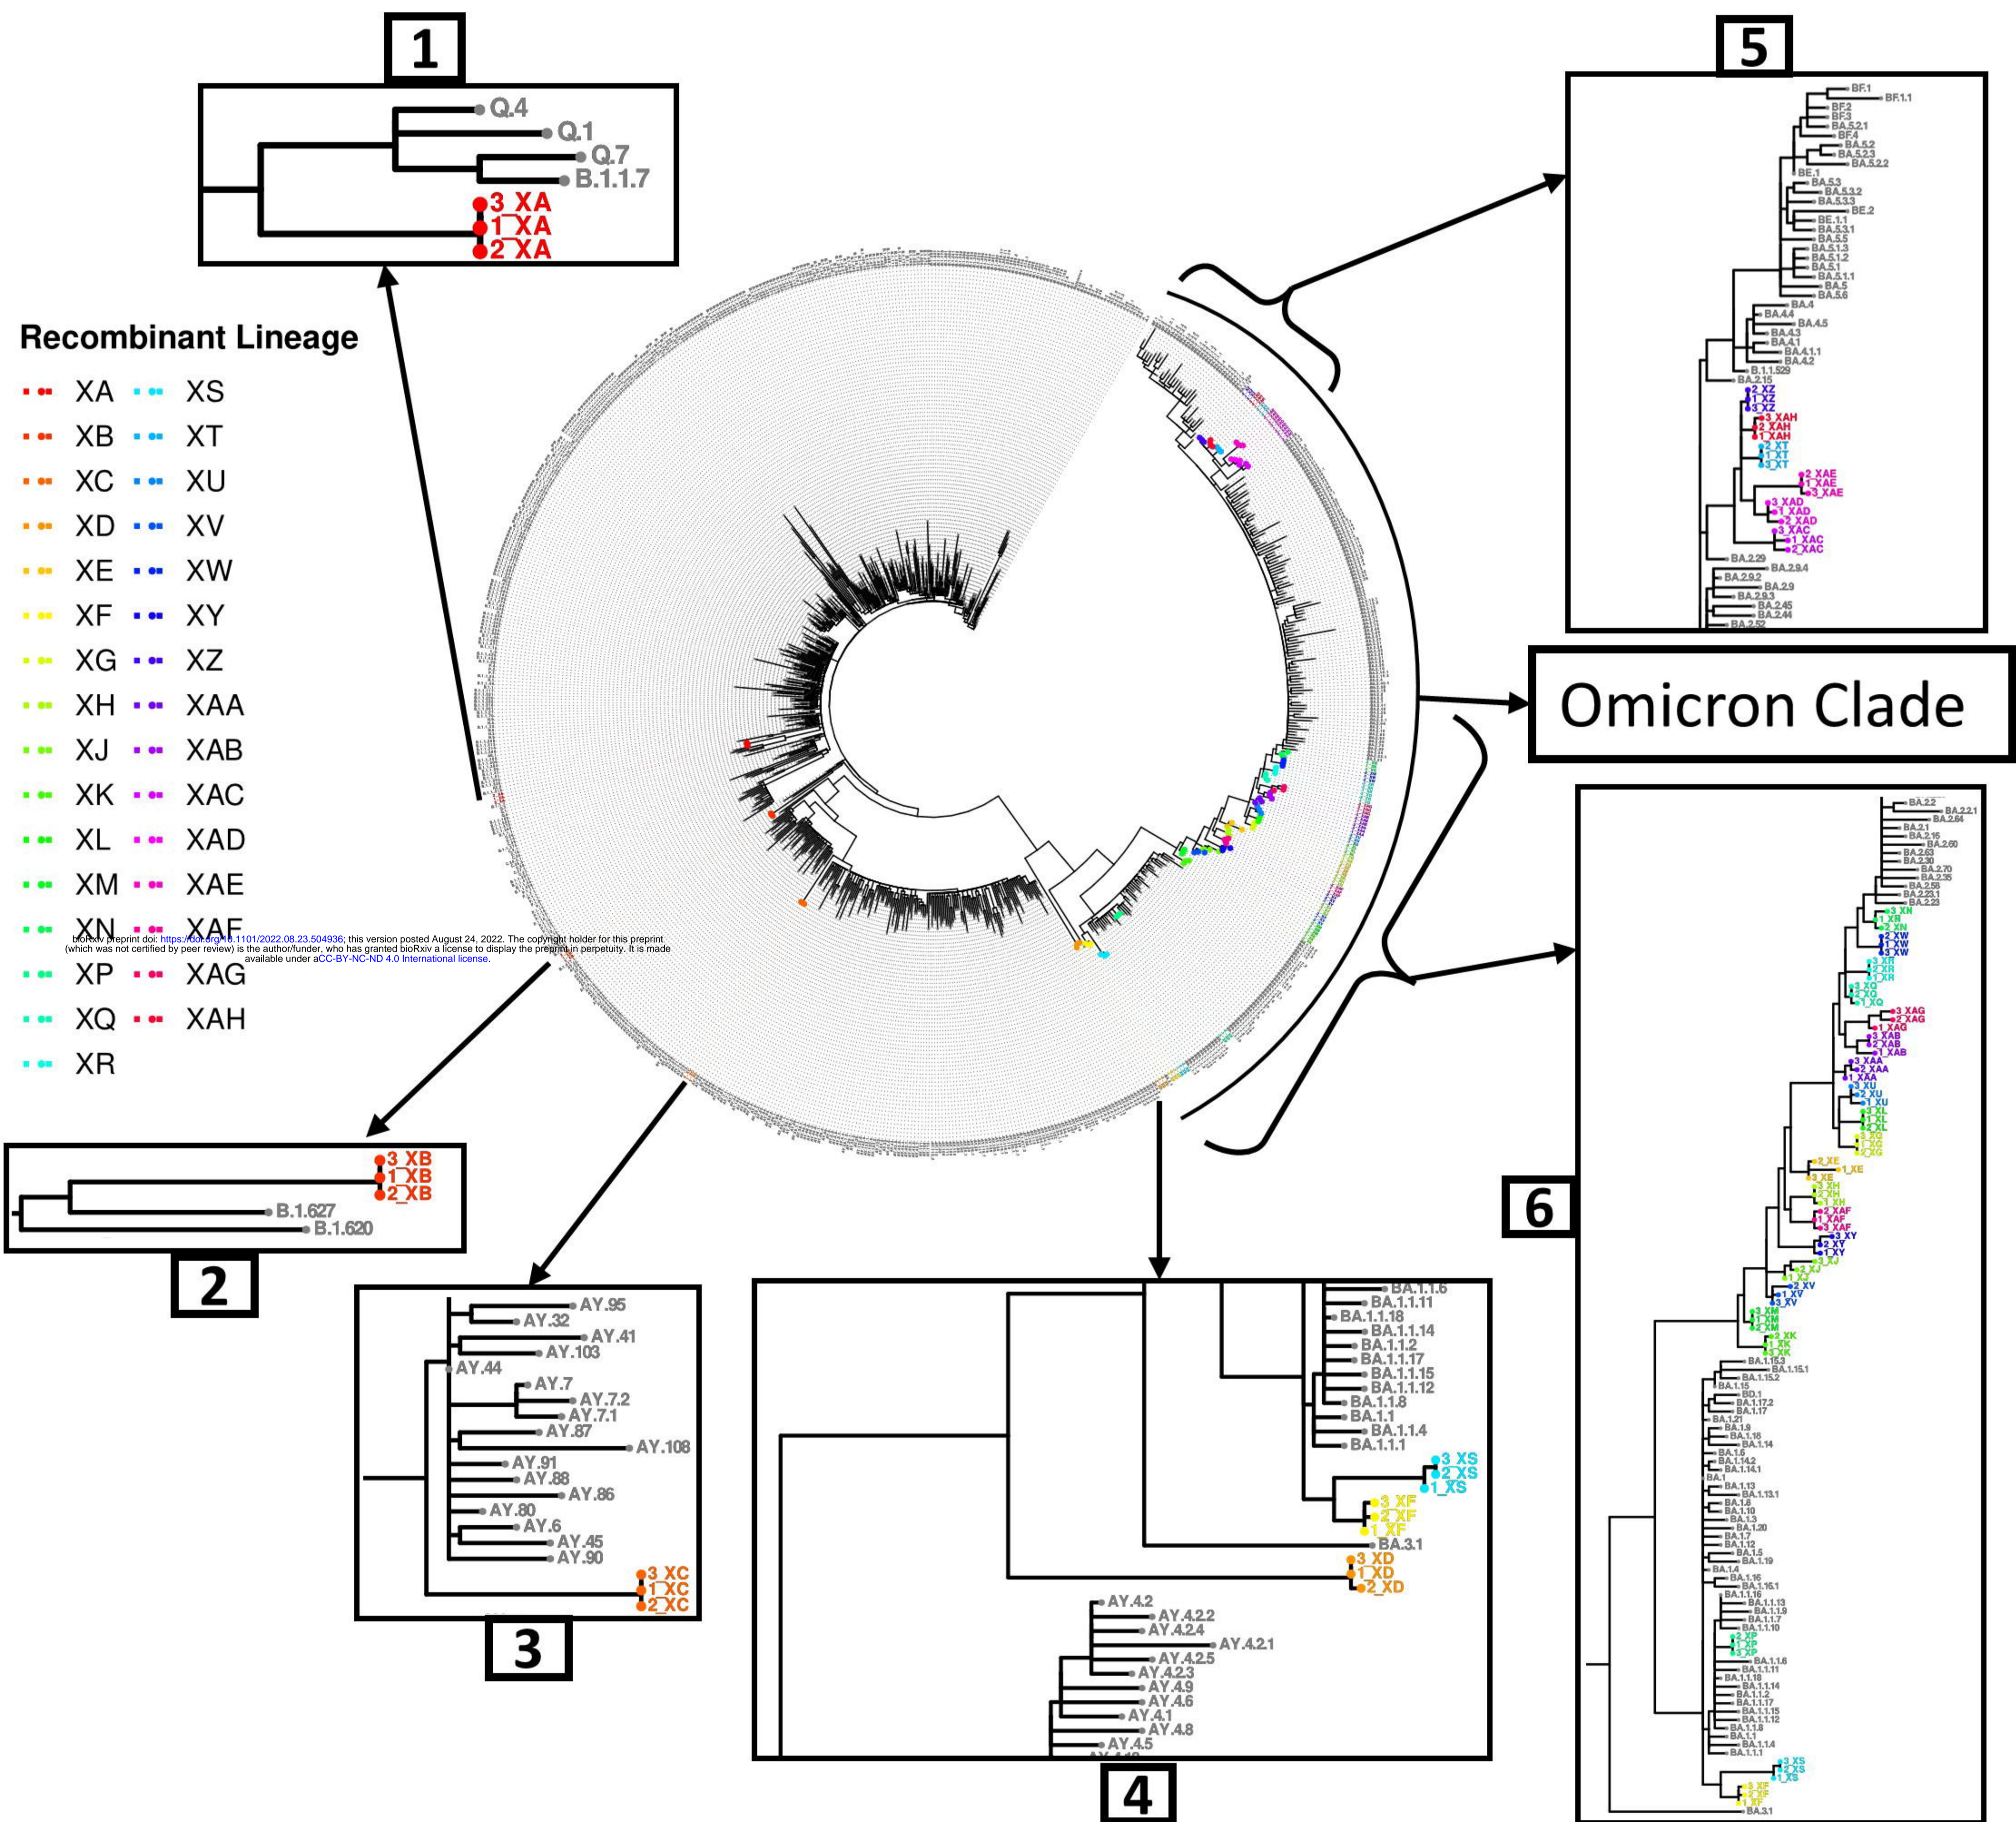

**A**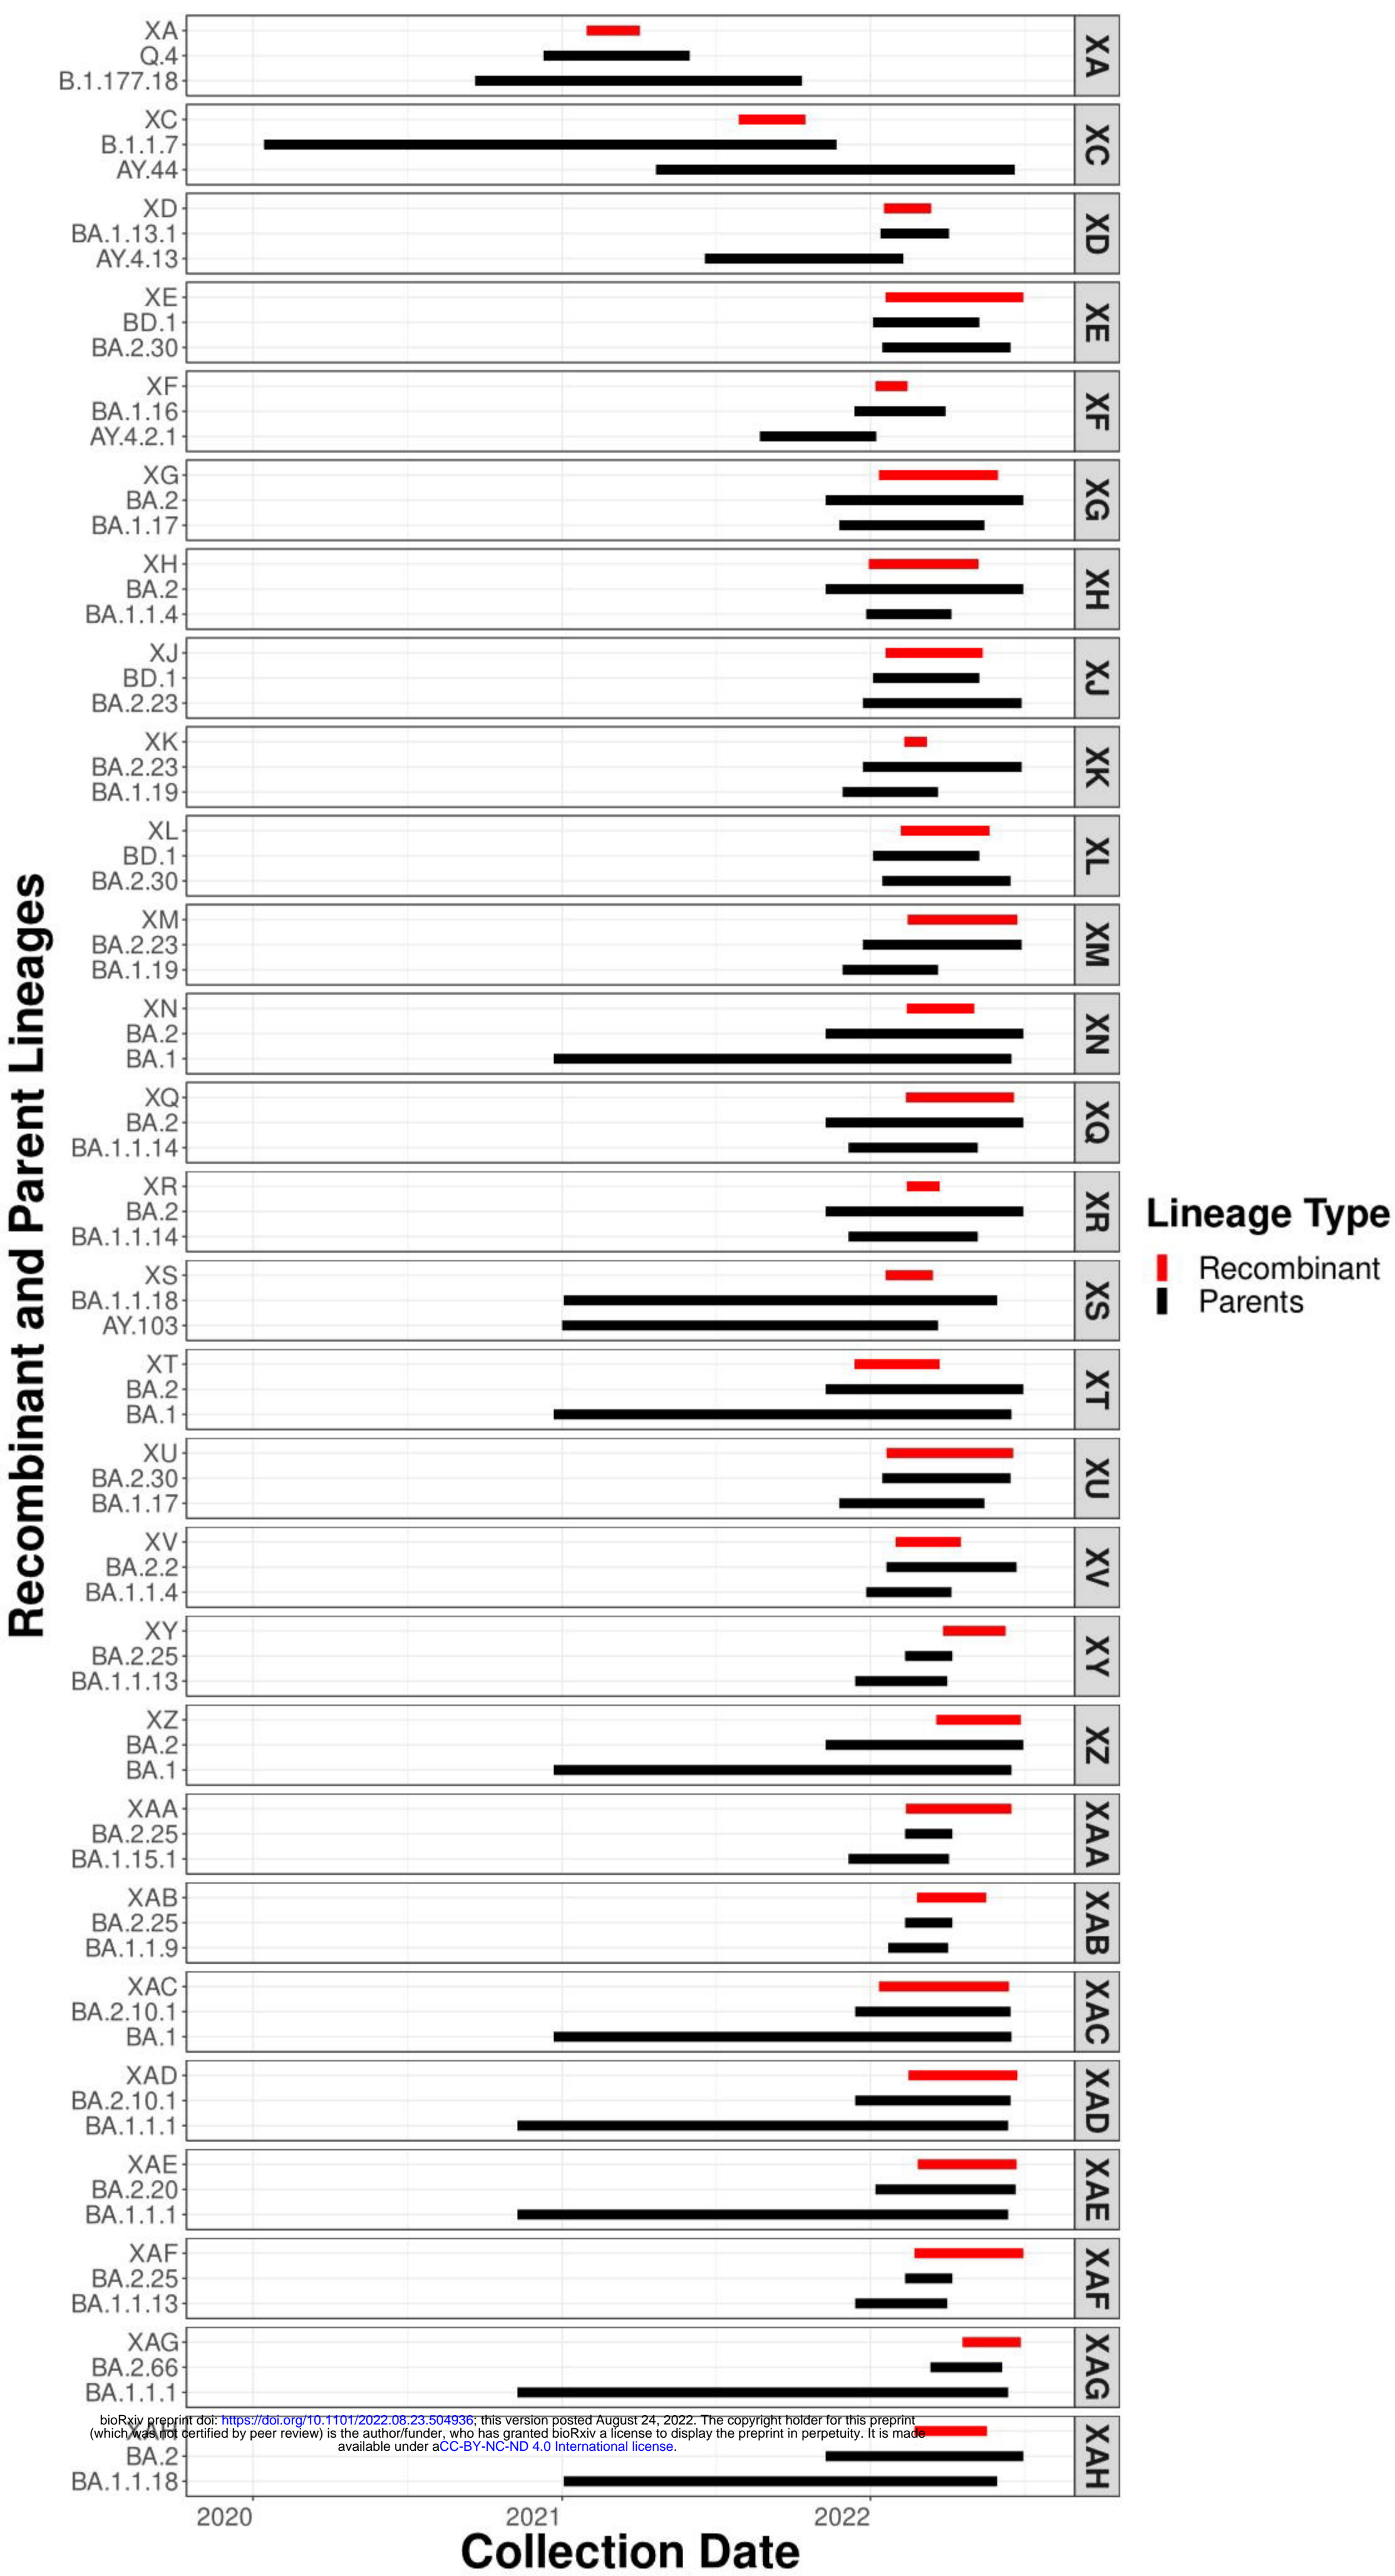**B**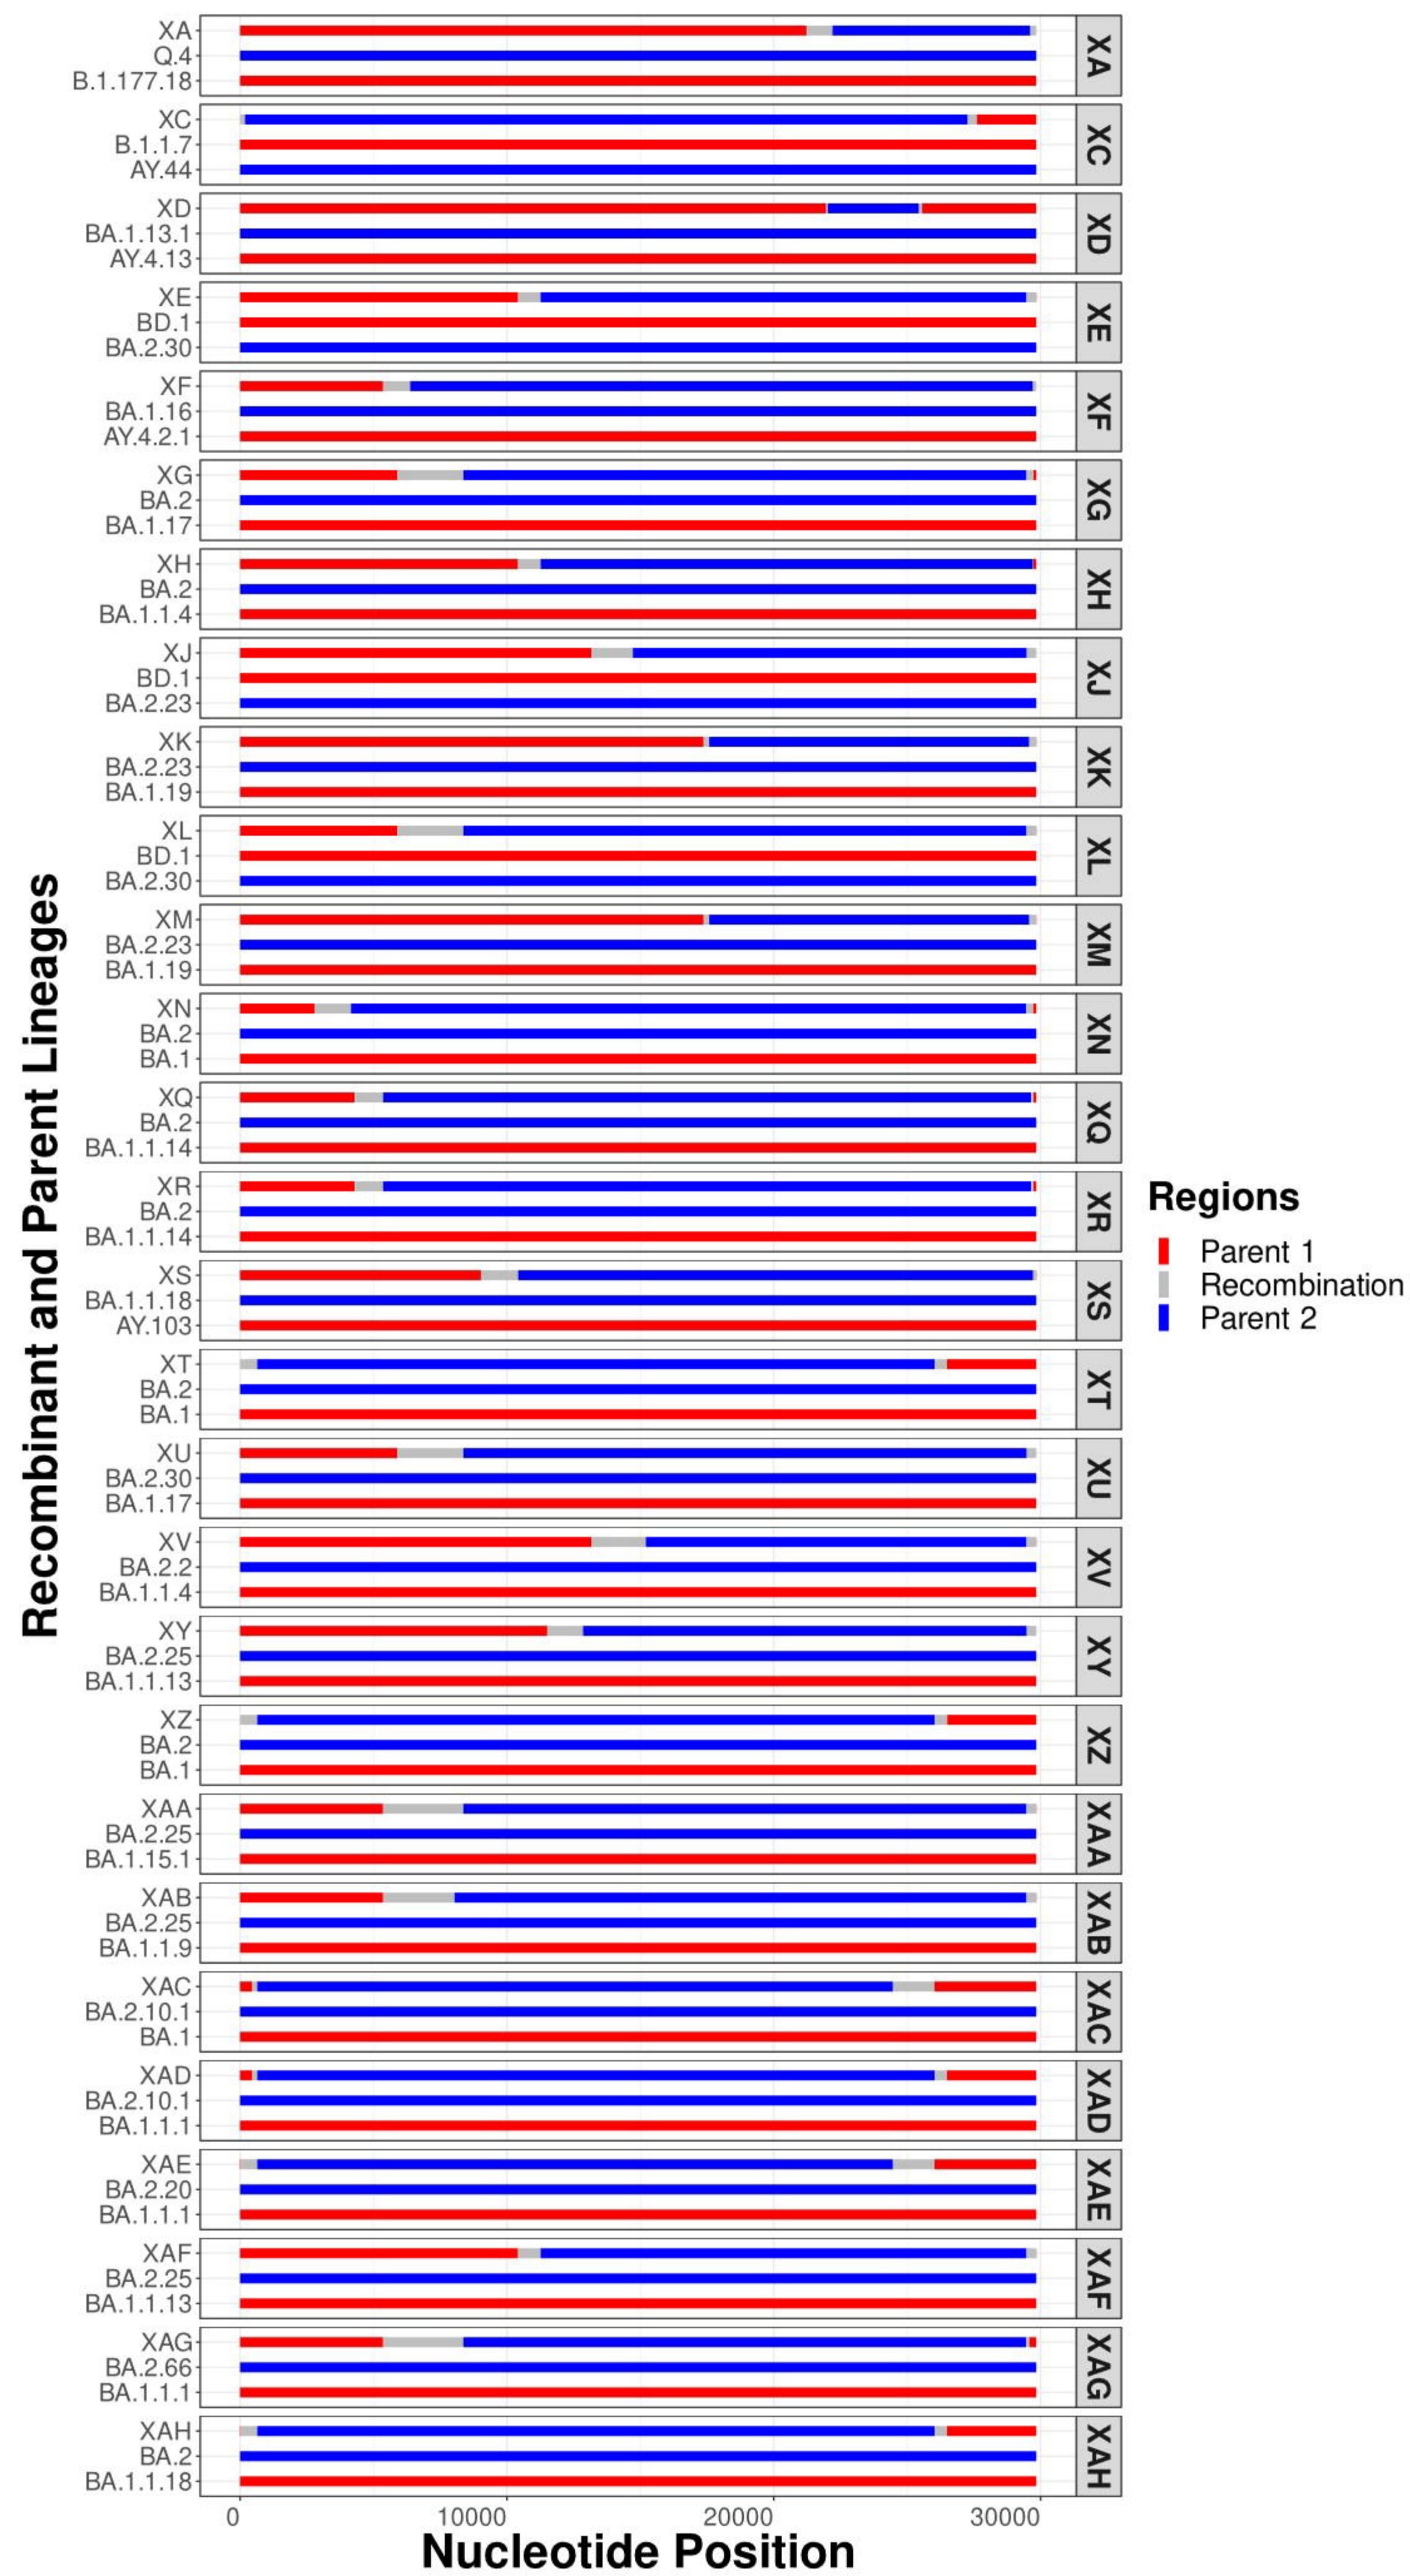**C**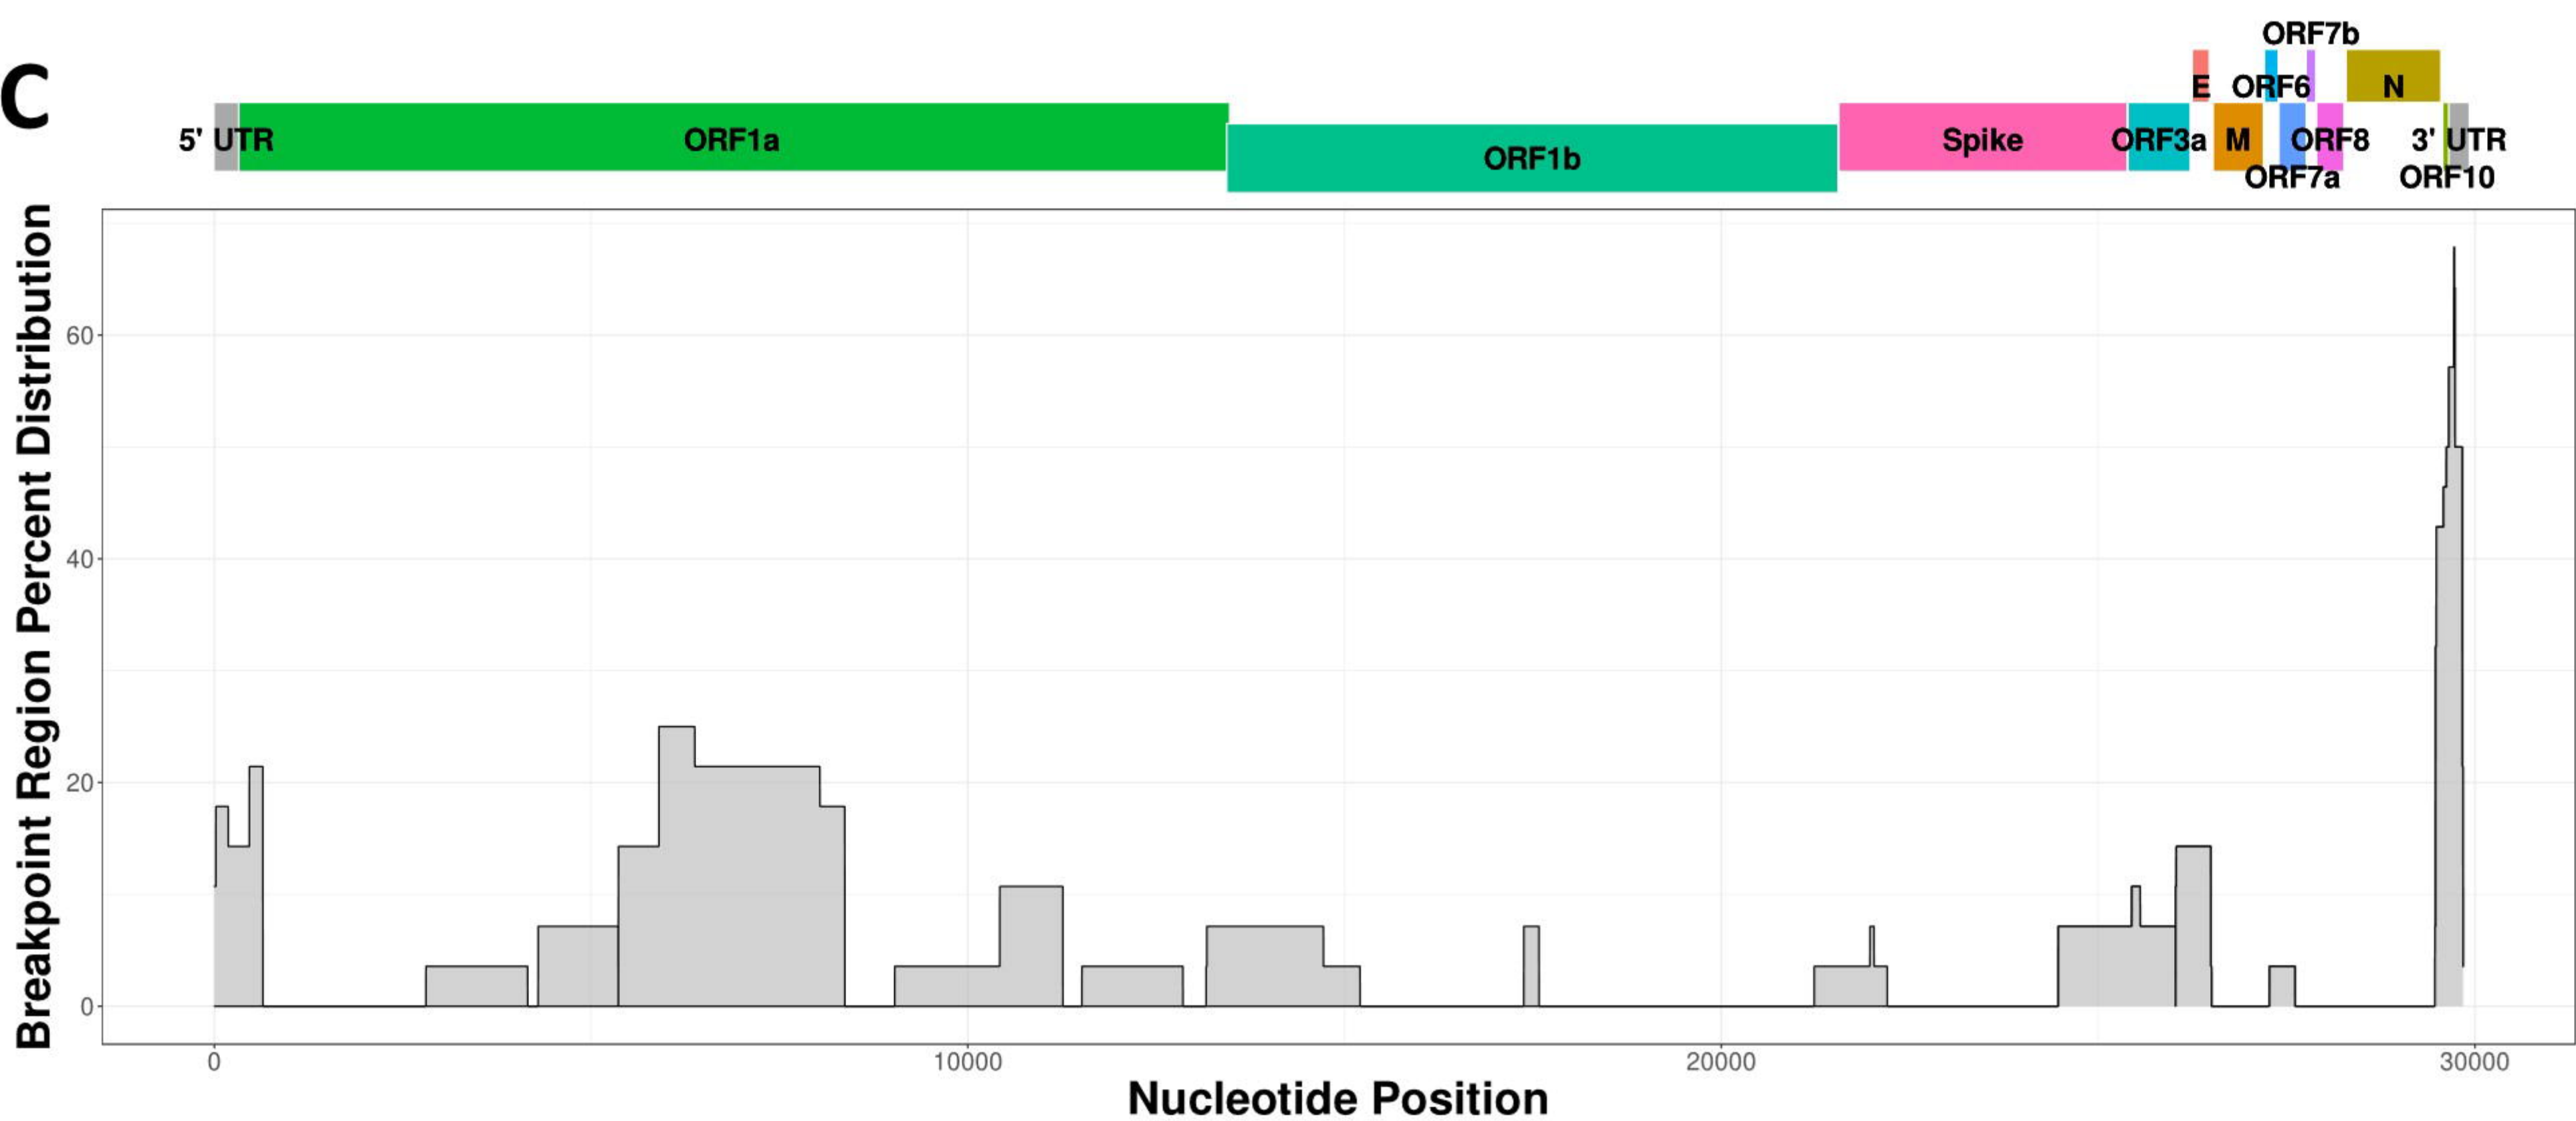

**A**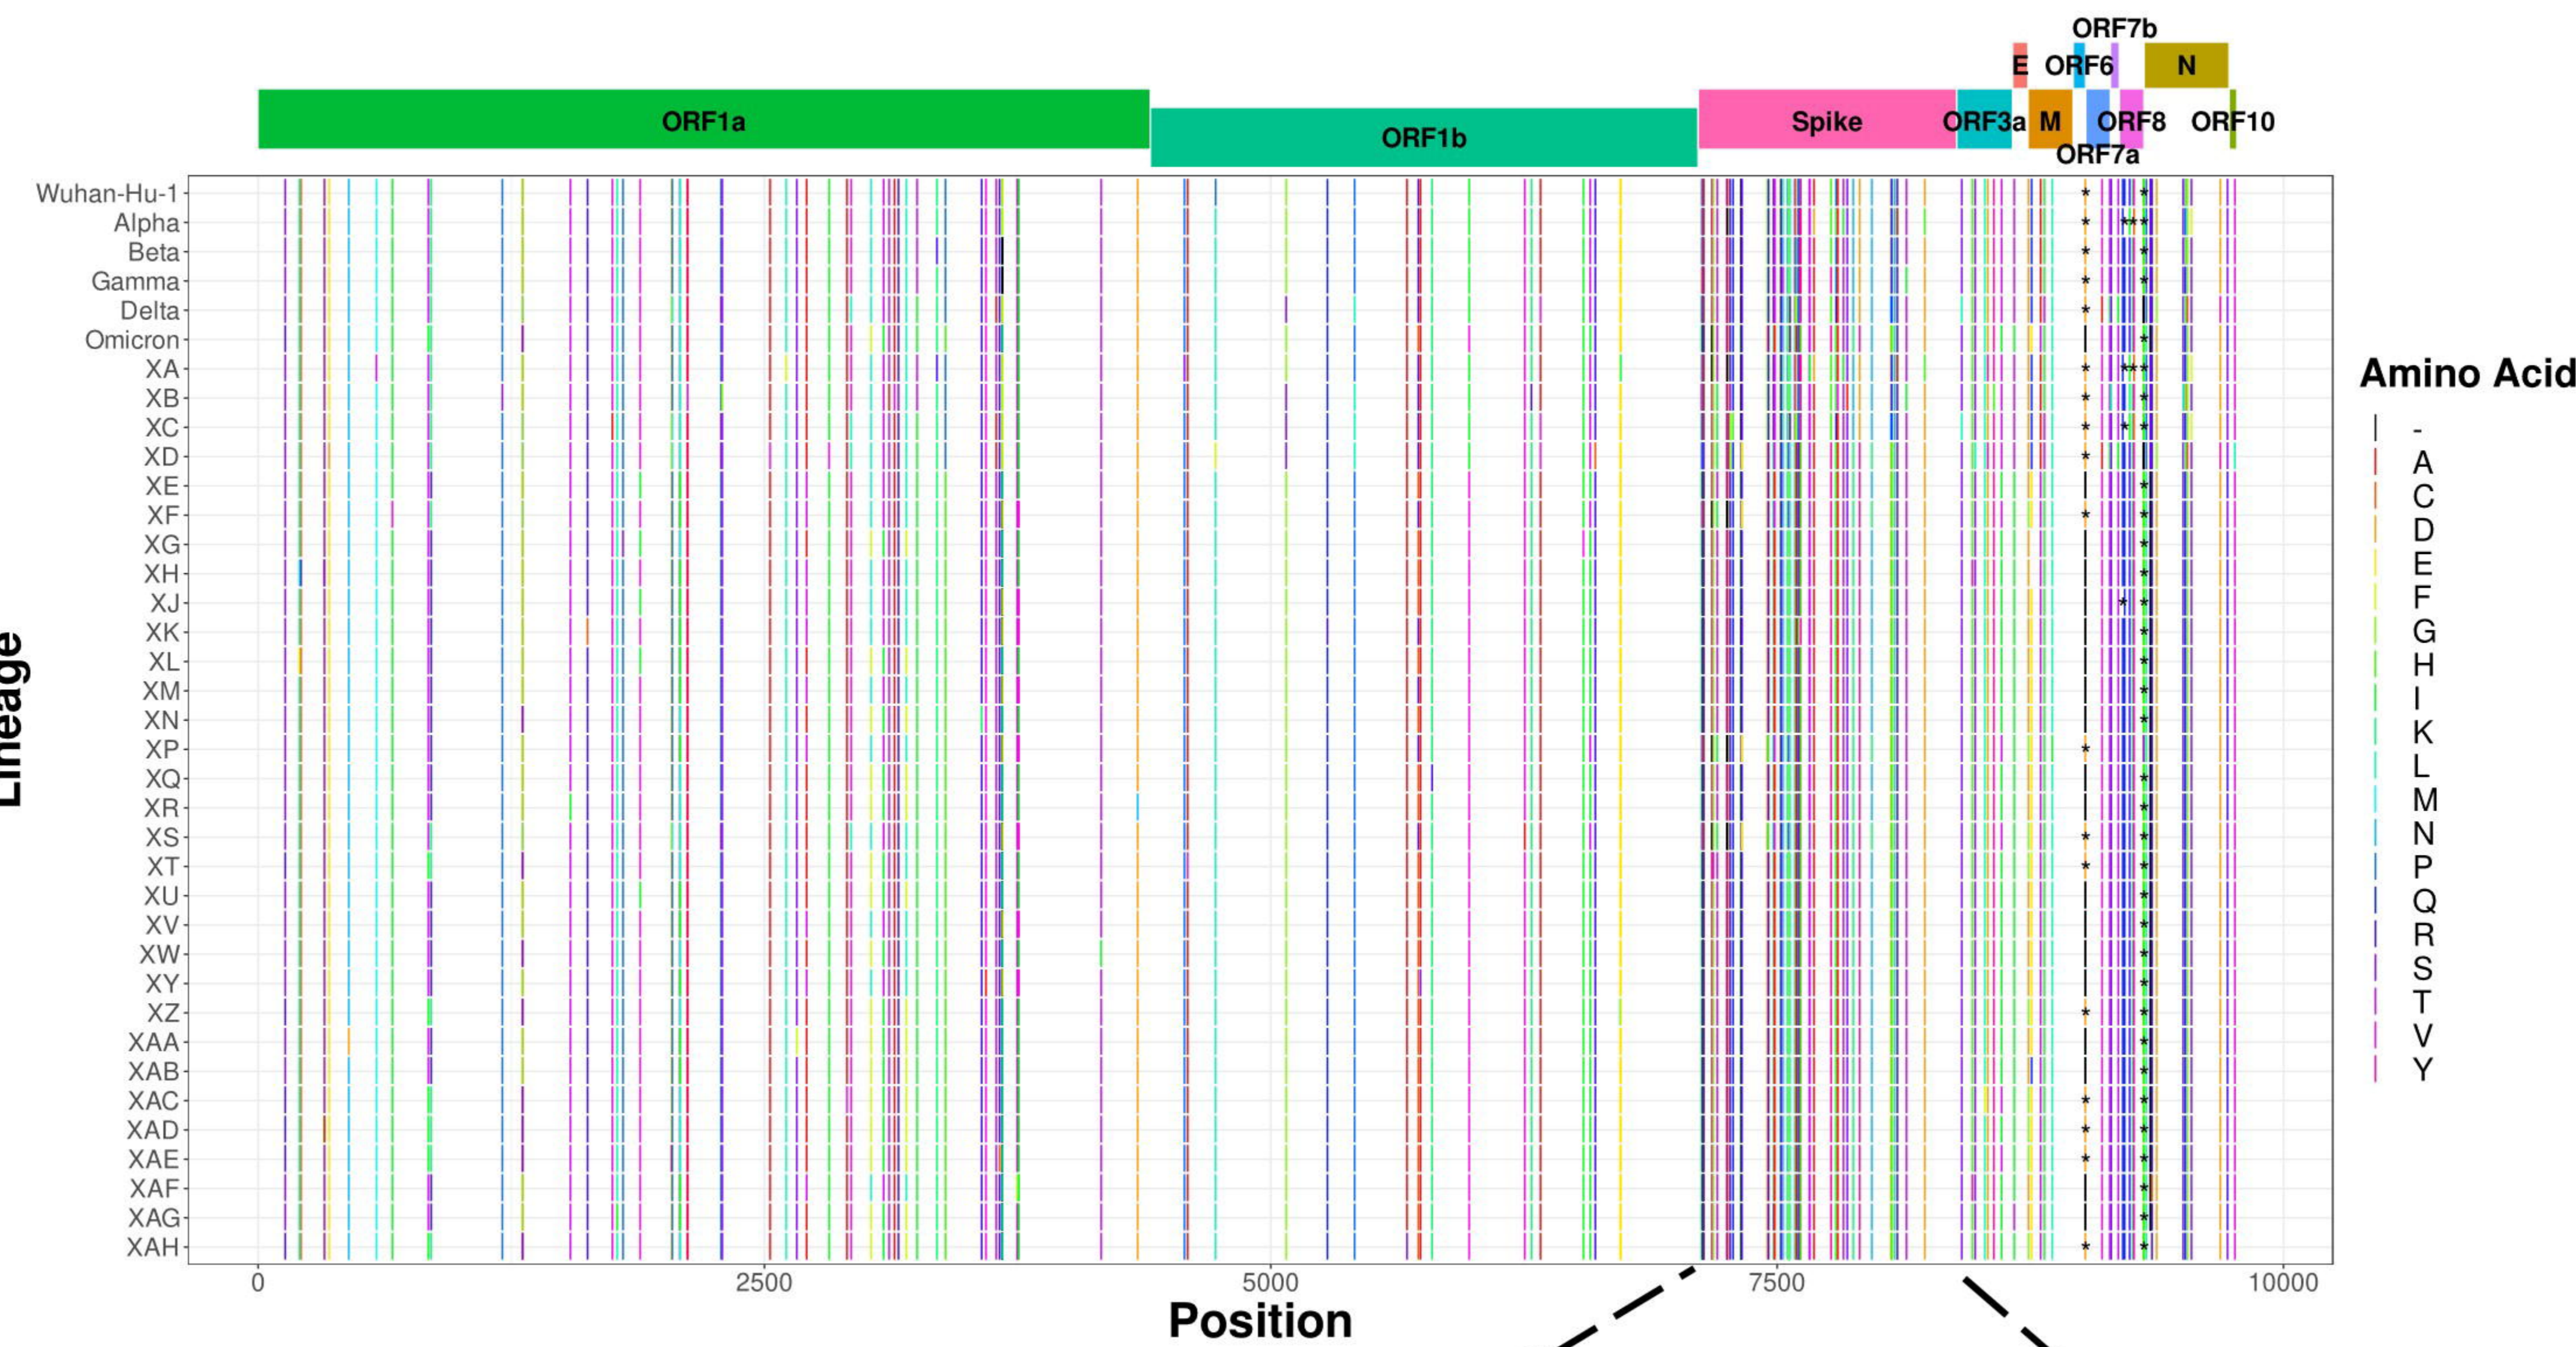**B**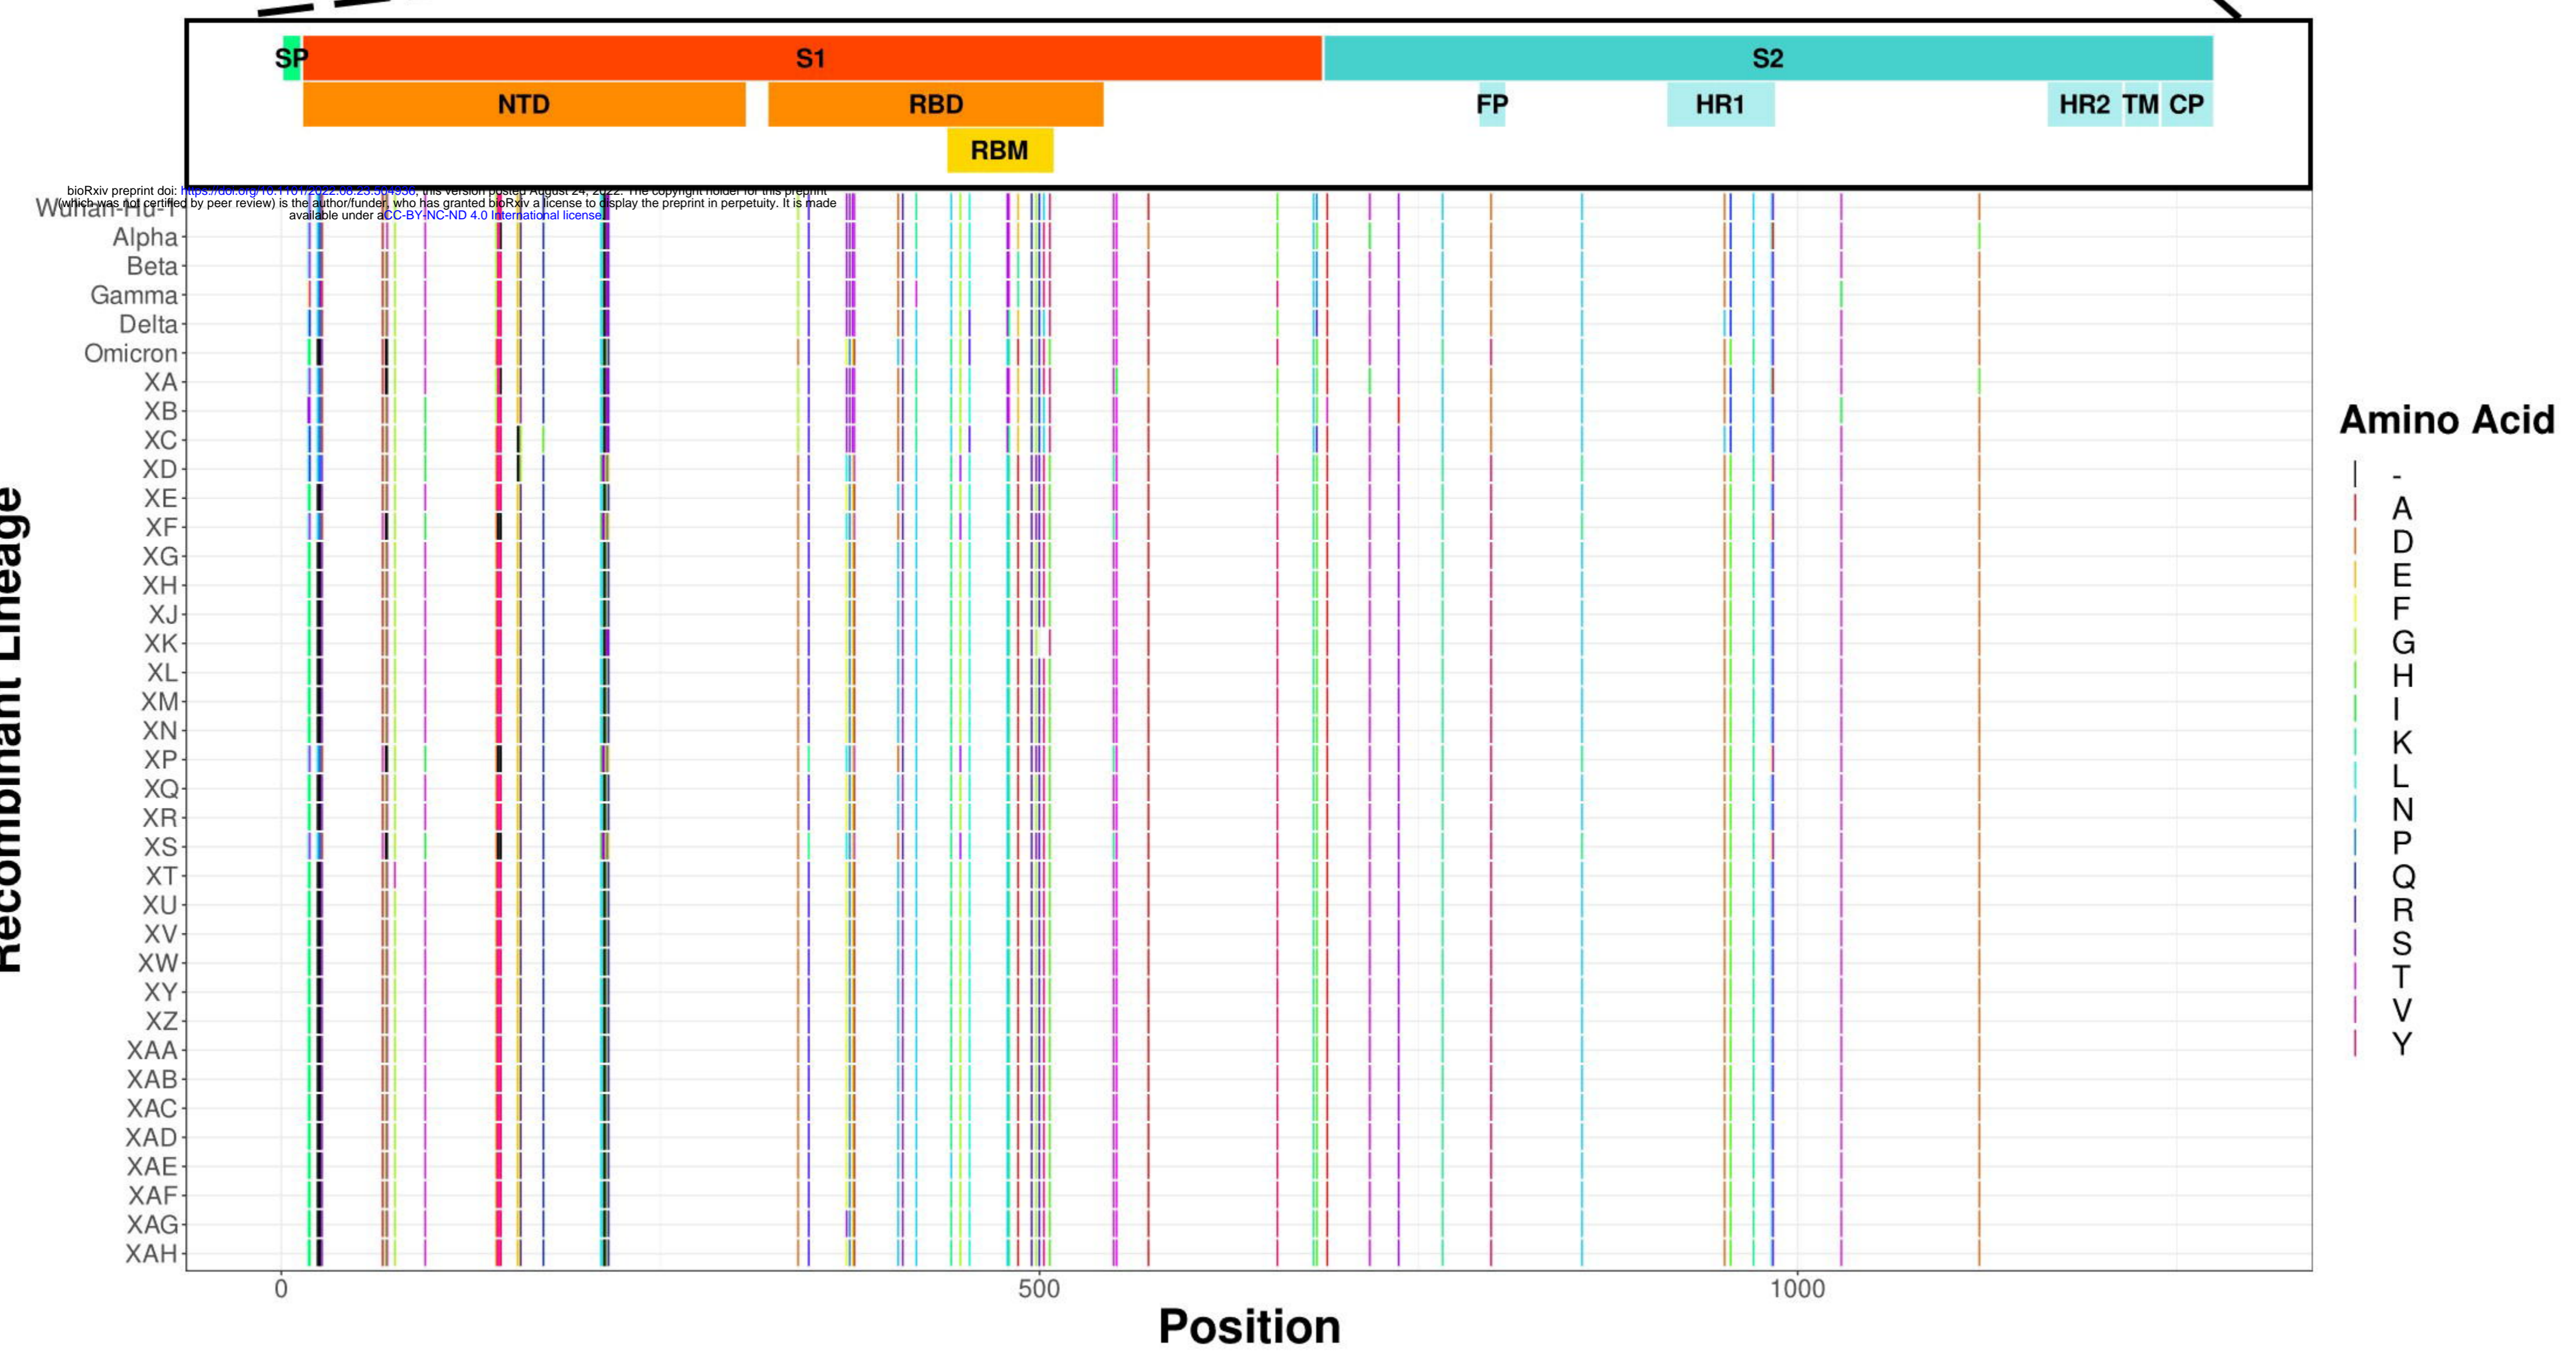

**A**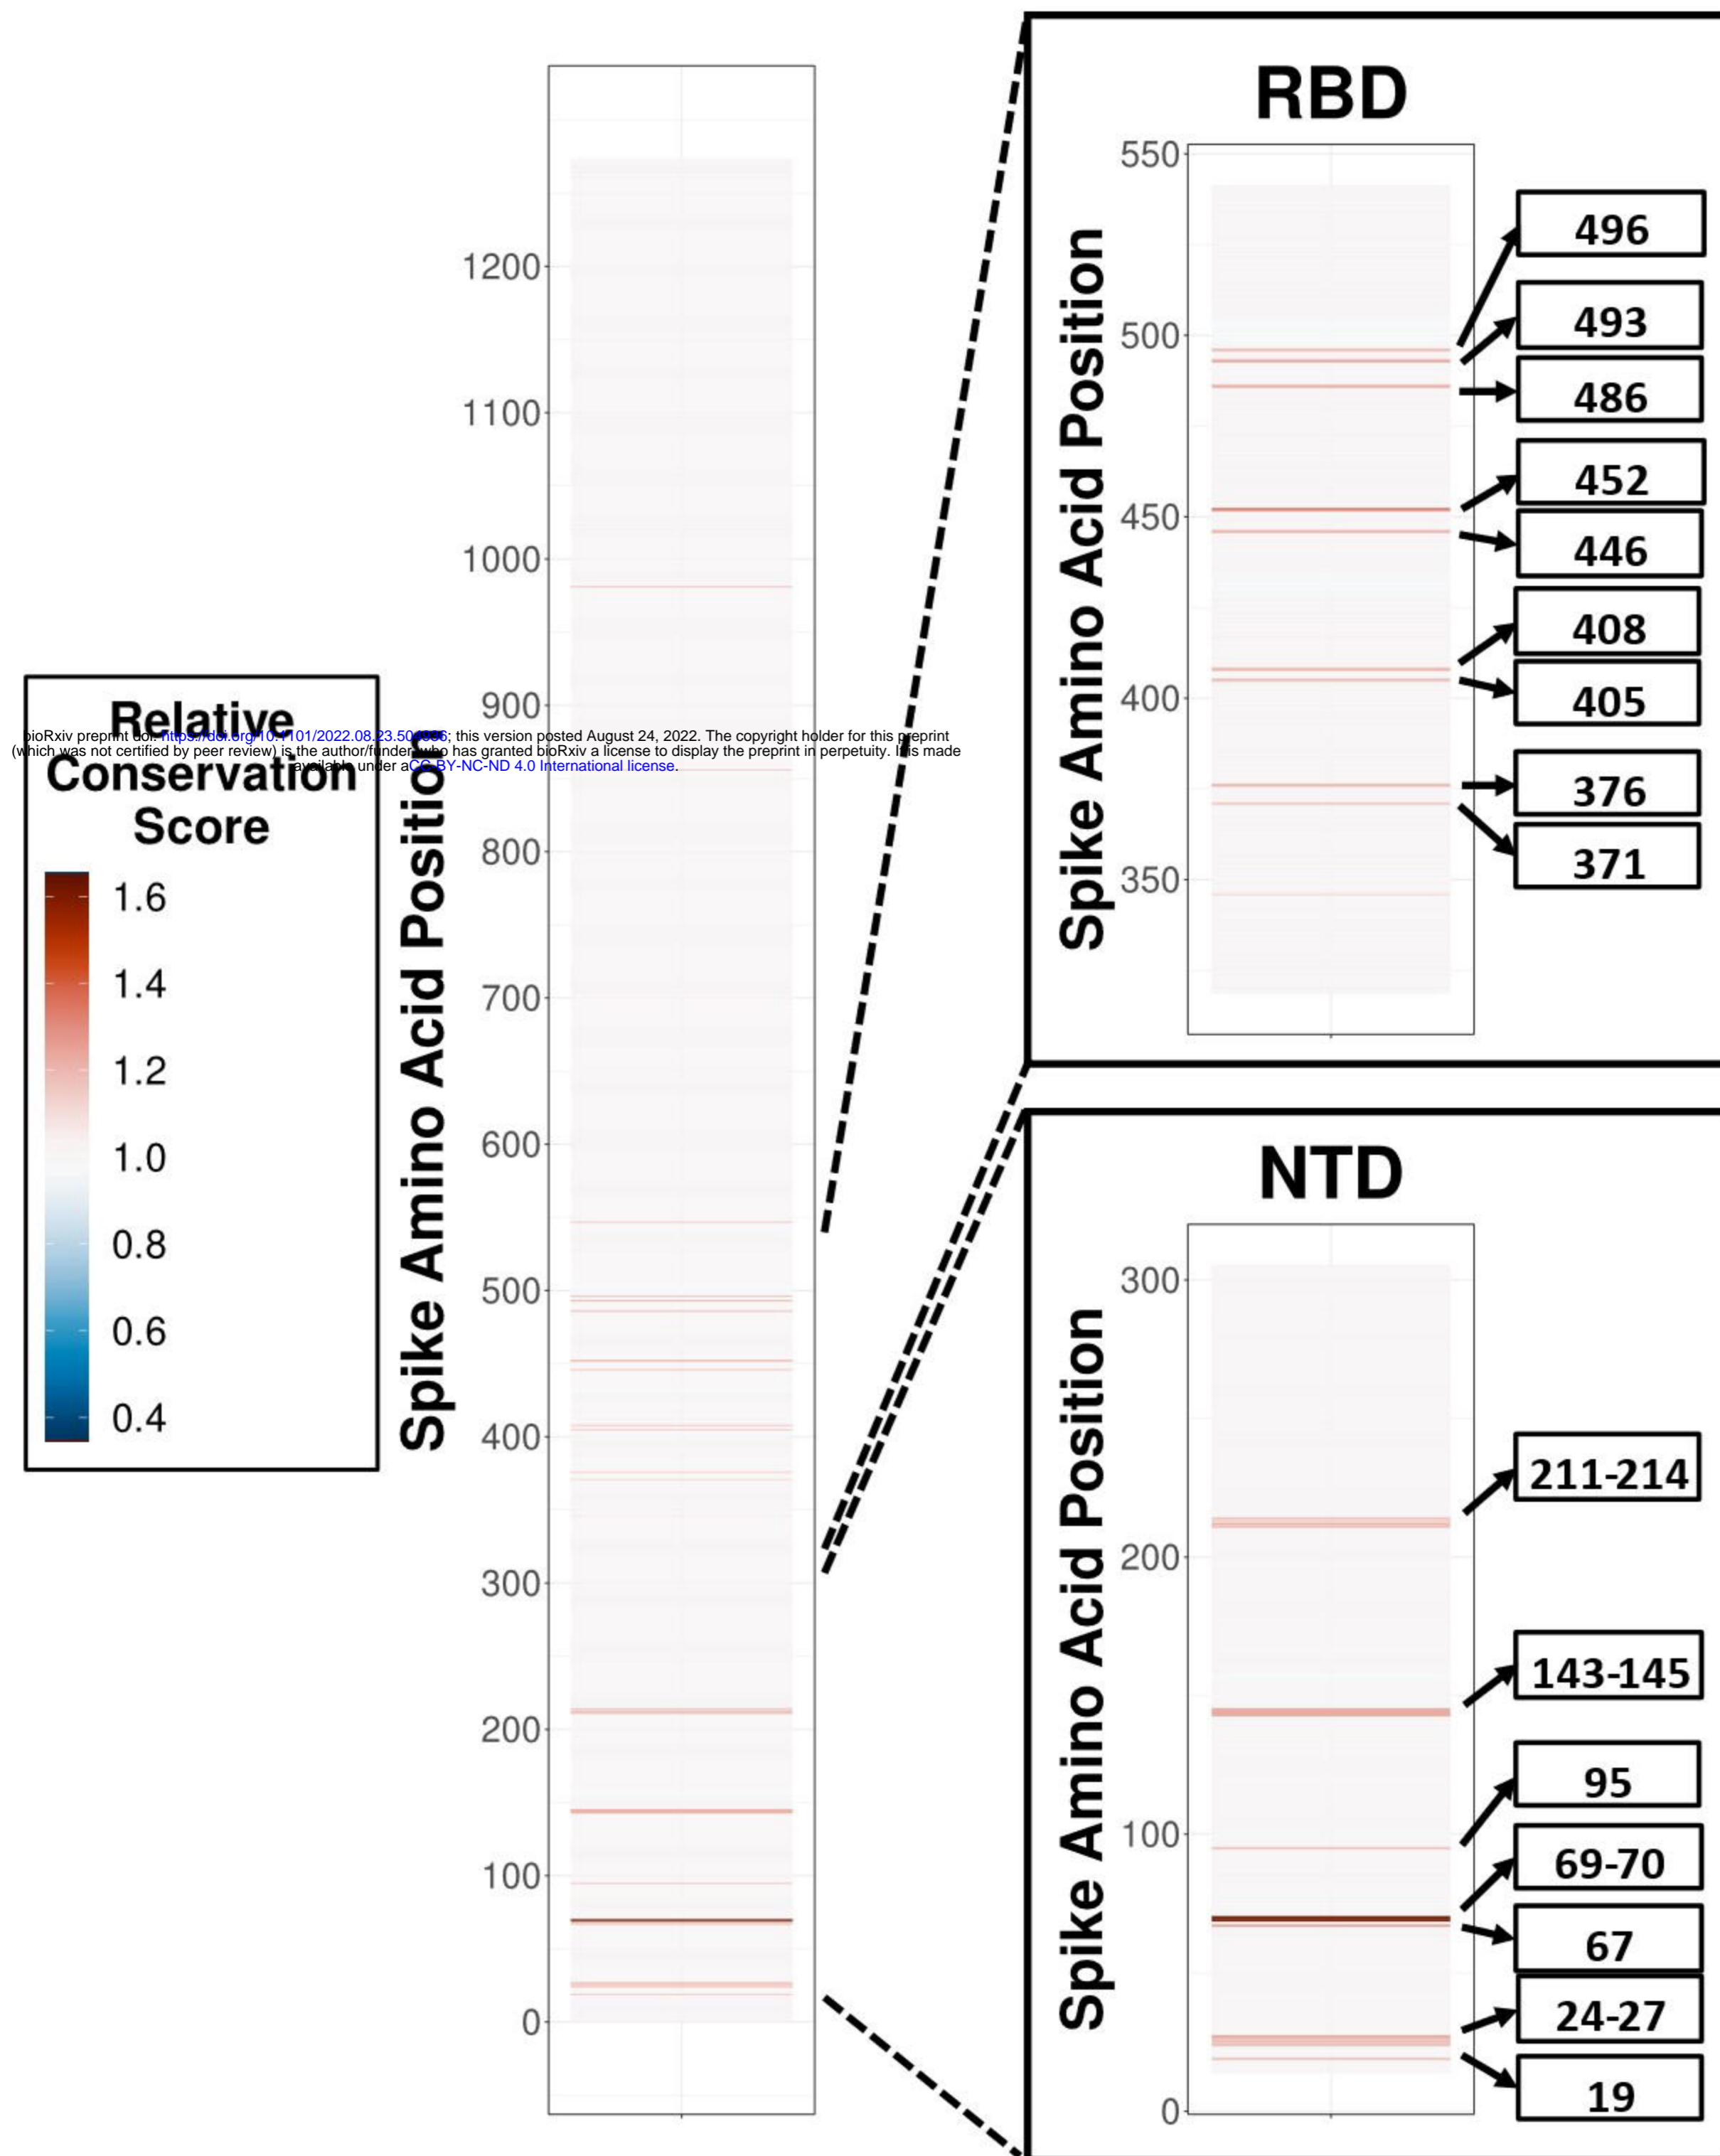**B**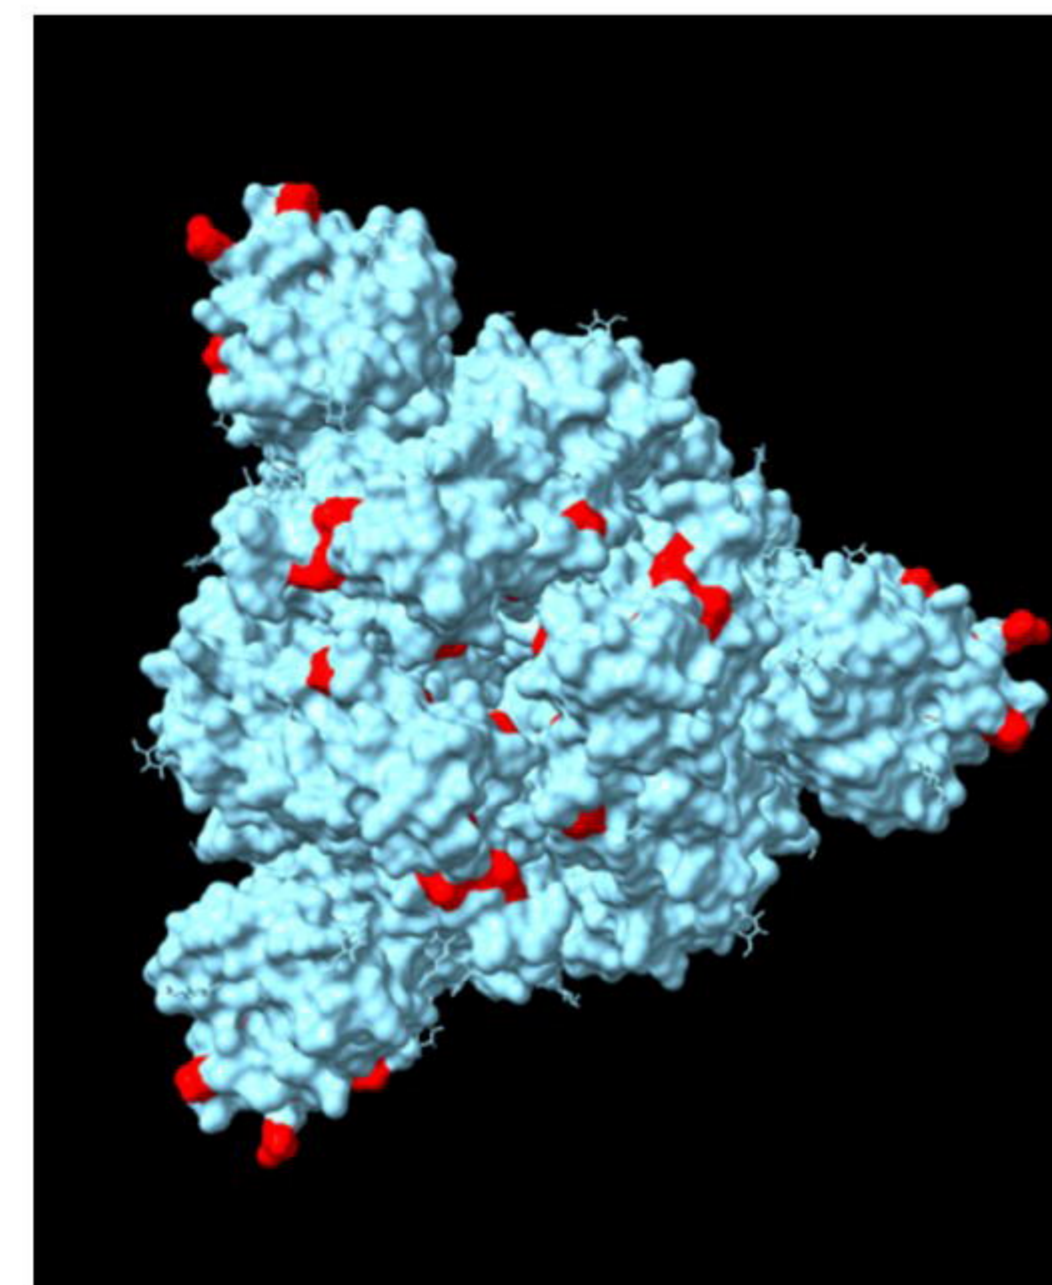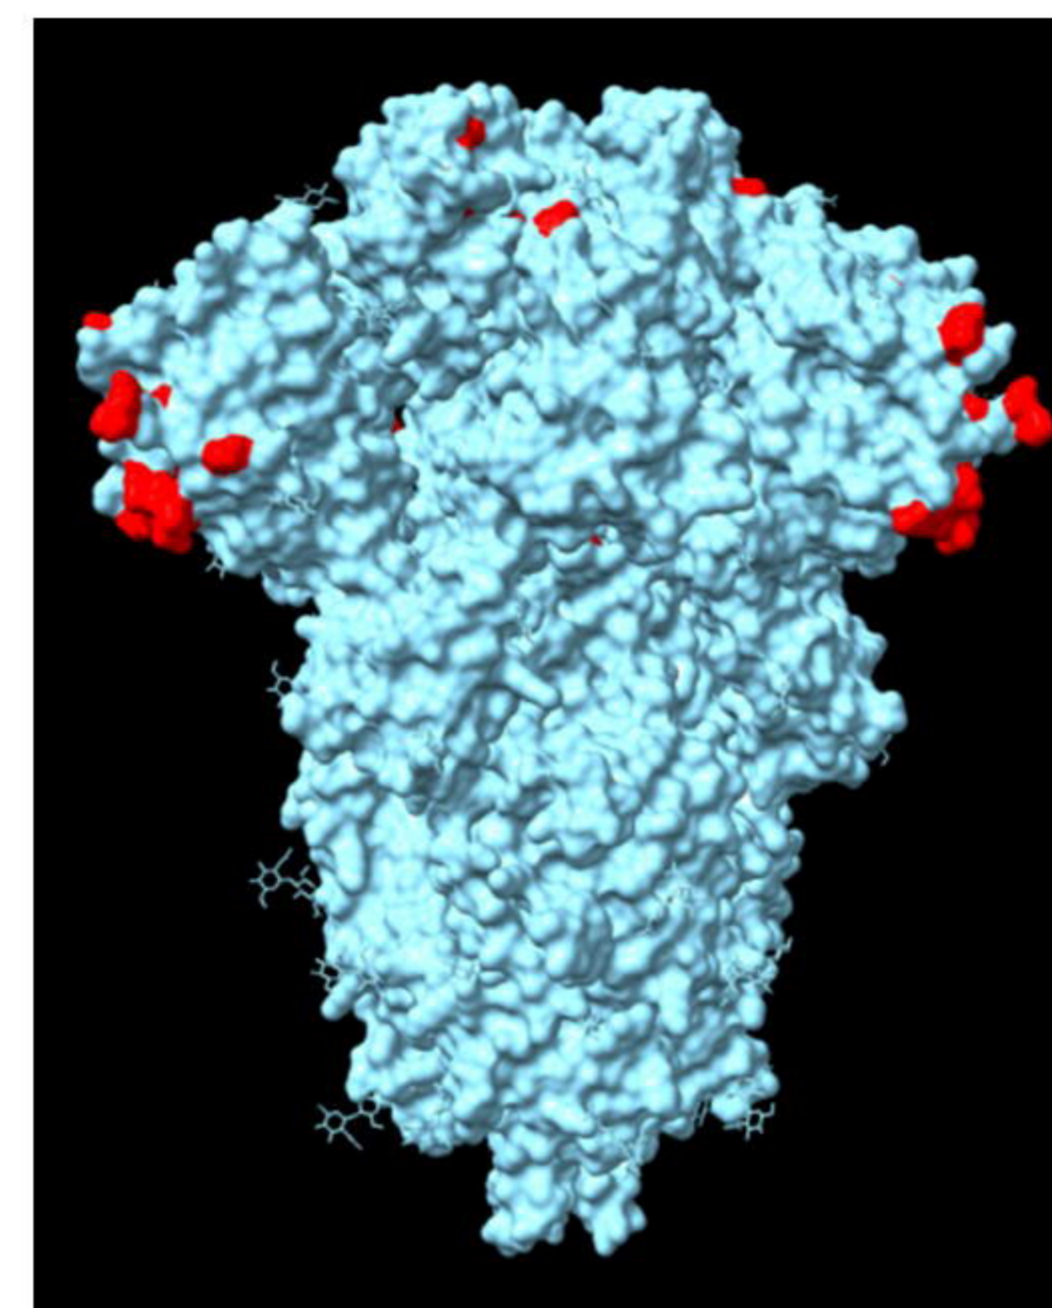

| Amino acid Position | Wuhan Reference Residue | Recombinant Conserved Residue | Relative Conservation Score | Significance                                                                                                                                                                                                                                                                                                                                                                                         | Reference |
|---------------------|-------------------------|-------------------------------|-----------------------------|------------------------------------------------------------------------------------------------------------------------------------------------------------------------------------------------------------------------------------------------------------------------------------------------------------------------------------------------------------------------------------------------------|-----------|
| 19                  | T                       | I                             | 1.18                        | T19I: Significant evasion from NTD-targeted neutralizing antibodies (nAbs)                                                                                                                                                                                                                                                                                                                           | (34)      |
| 24                  | L                       | -                             | 1.18                        | del24-26+A27S: Loss in neutralization activity of NTD-directed monoclonal antibodies(mAbs)                                                                                                                                                                                                                                                                                                           | (34)      |
| 25                  | P                       | -                             | 1.18                        | del25-27 : Significant evasion from NTD-targeted neutralizing antibodies (nAbs) ;<br>del24-26+A27S: Loss in neutralization activity of NTD-directed monoclonal antibodies(mAbs)                                                                                                                                                                                                                      | (33, 34)  |
| 26                  | P                       | -                             | 1.18                        | del25-27 : Significant evasion from NTD-targeted neutralizing antibodies (nAbs);<br>del24-26+A27S: Loss in neutralization activity of NTD-directed monoclonal antibodies(mAbs)                                                                                                                                                                                                                       | (33, 34)  |
| 27                  | A                       | S                             | 1.23                        | A27S: Reduce spike sensitivity to neutralization by sera from BNT/BNT vaccinated individuals;<br>del24-26+A27S: Loss in neutralization activity of NTD-directed monoclonal antibodies(mAbs)                                                                                                                                                                                                          | (34, 35)  |
| 213                 | V                       | G                             | 1.13                        | V213G: Reduce spike sensitivity to neutralization by sera from BNT/BNT vaccinated individuals                                                                                                                                                                                                                                                                                                        | (35)      |
| 371                 | S                       | F                             | 1.13                        | S317F: Induce large-scale escapes of broad sarbecovirus neutralizing antibodies(nAbs) ;<br>Reduce spike sensitivity to neutralization by BNT/BNT sera in the range of 2 to 5 fold                                                                                                                                                                                                                    | (7, 35)   |
| 376                 | T                       | A                             | 1.18                        | T376 mutation helps ACE2 competing antibodies escape                                                                                                                                                                                                                                                                                                                                                 | (7)       |
| 405                 | D                       | N                             | 1.17                        | D405N: Significant escape of BA.1 lineage omicron-specific neutralizing antibodies (nAbs) ;<br>Induce large-scale escapes of broad sarbecovirus neutralizing antibodies(nAbs) ;<br>D405 mutation helps ACE2 competing antibodies escape ;<br>Alters the antigenic surface that disrupts the binding of antibodies;<br>The main reason for poor crossreactivity among BA.2/BA.3/BA.4/BA.5 sublineage. | (7)       |
| 408                 | R                       | S                             | 1.2                         | R408S: Induce large-scale escapes of broad sarbecovirus neutralizing antibodies(nAbs)<br>R408 mutation helps ACE2 competing antibodies escape ;<br>Alters the antigenic surface that disrupts the binding of antibodies;                                                                                                                                                                             | (7)       |
| 493                 | Q                       | R                             | 1.23                        | Q493R: Emerges during bamlanivimab/etesevimab cocktail treatment ;<br>Causes resistance to bamlanivimab and etesevimab ;<br>Q493 is critical for binding to Class 2 and 3 antibodies ;<br>Q493 mutations increase binding affinity to the ACE2                                                                                                                                                       | (36)      |

**Table 1: SARS-CoV2 spike relative conserved mutated positions in recombinant lineages with discovered relevance in viral transmission and immune escape.** Column 1: SARS-CoV2 spike relative conserved mutated positions in recombinant lineages; Column 2: Wuhan Hu 1 strain reference sequence residue at the conserved positions; Column 3: Amino acid residue conserved among recombinant lineages(with at least one omicron variant parent lineage) at that relative conserved positions; Column 4: Relative conservation score of each conserved position; Column 5: Reported significance of the conserved mutation in the relative conserved position; Column 6: References reporting the significance of the conserved mutations in the relative conserved positions.
